# Supplementary material for: A cross-sectional survey of essential surgical capacity in Somalia
Source: PubMed Central journal article supplement — BMJ Open. 2014 May 7;4(5):e004360. doi: 10.1136/bmjopen-2013-004360 (PMC4024602; doi:10.1136/bmjopen-2013-004360), 2014-05-07
Supplement: bmjopen-2013-004360.draft_revisions.pdf [file bmjopen-2013-004360.draft_revisions.pdf]

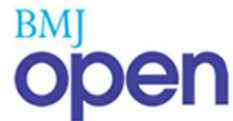

## Essential Surgical Capacity in Somalia

|                                    |                                                                                                                                                                                                                                                                                                                                                                                                        |
|------------------------------------|--------------------------------------------------------------------------------------------------------------------------------------------------------------------------------------------------------------------------------------------------------------------------------------------------------------------------------------------------------------------------------------------------------|
| Journal:                           | <i>BMJ Open</i>                                                                                                                                                                                                                                                                                                                                                                                        |
| Manuscript ID:                     | bmjopen-2013-004360                                                                                                                                                                                                                                                                                                                                                                                    |
| Article Type:                      | Research                                                                                                                                                                                                                                                                                                                                                                                               |
| Date Submitted by the Author:      | 29-Oct-2013                                                                                                                                                                                                                                                                                                                                                                                            |
| Complete List of Authors:          | Sharma, Akshay; Harvard University, Harvard College<br>Elkheir, Natalie; St George's Hospital, London,<br>Cherian, M; World Health Organization, Emergency and Essential Surgical<br>Care<br>Saleh, Omar; World Health Organization Somalia,<br>Everard, Marthe; World Health Organization Somalia,<br>Popal, Ghulam; World Health Organization Somalia,<br>Ibrahim, Abdi; Ministry of Health Somalia, |
| <b>Primary Subject<br>Heading</b>: | Surgery                                                                                                                                                                                                                                                                                                                                                                                                |
| Secondary Subject Heading:         | Anaesthesia, Global health, Health services research, Obstetrics and<br>gynaecology, Medical management                                                                                                                                                                                                                                                                                                |
| Keywords:                          | ANAESTHETICS, Health & safety < HEALTH SERVICES ADMINISTRATION &<br>MANAGEMENT, Quality in health care < HEALTH SERVICES<br>ADMINISTRATION & MANAGEMENT, MEDICAL EDUCATION & TRAINING,<br>SURGERY, WOUND MANAGEMENT                                                                                                                                                                                    |
|                                    |                                                                                                                                                                                                                                                                                                                                                                                                        |

SCHOLARONE™  
Manuscripts

only

# Essential Surgical Capacity in Somalia

## Corresponding Author:

Akshay Sharma  
254 Cabot Mail Center  
Cambridge, MA USA  
Phone: 001-949-735-4736  
Email: akshay1227@gmail.com

## Co-Authors:

Dr. Natalie Elkheir<sup>1</sup>; Akshay Sharma<sup>2</sup>; Dr. Meena Cherian<sup>3</sup>; Dr. Omar Abdelrahman Saleh<sup>4</sup>; Dr. Marthe Everard<sup>5</sup>; Dr. Ghulam Rabani Popal<sup>6</sup>; Dr Abdi Awad Ibrahim<sup>7</sup>

<sup>1</sup>St. George's Hospital, London, United Kingdom

<sup>2</sup>Harvard College, Harvard University, Cambridge, Massachusetts, USA

<sup>3</sup>Emergency & Essential Surgical Care Programme, Health Systems and Innovation, World Health Organization - HQ, Geneva, Switzerland

<sup>4</sup>EHA Coordinator, World Health Organization Somalia, Nairobi, Kenya

<sup>5</sup>World Health Organization Somalia, Nairobi, Kenya

<sup>6</sup>WHO Representative Somalia, World Health Organization Somalia, Nairobi, Kenya

<sup>7</sup>Resident Advisor to the Minister of Health Somalia, Ministry of Health Somalia, Mogadishu, Somalia

**Keywords:** Surgery, Somalia, Emergency, Anaesthesia, Trauma

**Word count:** 2,679

## ABSTRACT

**Objective:** To assess life-saving and disability-preventing surgical including emergency, trauma, obstetrics, anaesthesia services of health facilities Somalia to assist in planning strategies for strengthening surgical care systems.

**Design:** Cross-sectional survey

**Setting:** Health facilities in all 3 administrative zones of Somalia: northwest Somalia (NWS), known as Somaliland; northeast Somalia (NES), known as Puntland; and south/central Somalia (SCS).

**Participants:** 14 health facilities

**Measures:** The WHO Tool for Situational Analysis to Assess Emergency and Essential Surgical Care was employed to capture a health facility's capacity to deliver (including obstetrics and trauma) and anaesthesia services by investigating four categories of data: infrastructure; human resources; interventions available; and equipment.

**Results:** The 14 facilities surveyed in Somalia represented 10 of 18 districts throughout the country. The facilities served an average patient population of 331,250 people, and 12 of 14 identified as hospitals. While major surgical procedures were provided at many facilities (Caesarean Section, Laparotomy, Appendectomy, etc.), only 22% had fully available oxygen access, 50% fully available electricity, and less than 30% had any management guidelines for emergency and surgical care. Further, only 36% were able to provide general anaesthesia inhalation due lack of skills, supplies, and equipment. Basic supplies for airway management and prevention of infection and HIV transmission were severely lacking in most facilities.

**Conclusions:** According to the results of the WHO Tool for Situational Analysis to Assess Emergency and Essential Surgical Care survey, there exist significant gaps in the capacity of emergency and essential surgical services in Somalia including inadequacies in essential equipment and infrastructure. The information provided by this tool can serve as a basis for evidenced-based decisions on country-level policy regarding the allocation of resources and provision of emergency and essential surgical services.

## ARTICLE SUMMARY

### Article Focus

- On-site visits to primary health centres in a developing nation
- Evaluate capacity to deliver emergency and essential surgical care

### Strengths and limitations of this study

- Provides insight into the surgical capacity of Somalia
- Identifies significant gaps and areas for improvement towards evidence-based planning to improve surgical infrastructure, skills training, and equipment and supplies
- Does not capture data from every first-referral health facilities of the country

## INTRODUCTION

Conditions that can be treated with surgery account for an estimated 11% of the world's disability-adjusted life years.[1] Despite recent data estimating the global volume of

1  
2  
3  
4  
5  
6  
7  
8  
9  
10  
11  
12  
13  
14  
15  
16  
17  
18  
19  
20  
21  
22  
23  
24  
25  
26  
27  
28  
29  
30  
31  
32  
33  
34  
35  
36  
37  
38  
39  
40  
41  
42  
43  
44  
45  
46  
47  
48  
49  
50  
51  
52  
53  
54  
55  
56  
57  
58  
59  
60

surgery at 234 million surgical procedures annually and significant disparities between procedures performed in high- and low- income countries, global public health initiatives have traditionally neglected the necessity for the provision of surgical services.[2] Poor access to surgical services, particularly at rural facilities, results in excess morbidity and mortality from a broad range of treatable surgical conditions including injuries, complications of pregnancy, sequelae of infectious diseases, acute abdominal conditions and congenital anomalies. Improving the access to surgical services in low-income countries requires addressing gaps in infrastructure, trained/skilled personnel, appropriate equipment and medications.

## BACKGROUND

Somalia's 21 years of war, armed conflict and insecurity have had a devastating effect on the health sector. The current situation is at its worst level since the beginning of the civil war in 1991, with unprecedented levels of child malnutrition, internal displacement, as well as conflict and insecurity rife in some parts of the country.[3] Continuing conflict has left 90% of health infrastructure looted, damaged or destroyed.[4] The low health workforce ratios before the war have depreciated through high levels of healthcare worker emigration, leaving an estimated 3 physicians per 100000 population (total 253 physicians), 11 nurses per 100 000 population (861 nurses) and 2 midwives per 100 000 population (116 midwives) serving the whole country.[5]

Rates of death and disability from treatable surgical conditions continue to be unacceptably high. Somalia's maternal mortality rate is estimated to be 1044 per 100 000 live births, one of the highest in the region.[6] This corresponds to a lifetime risk of one maternal death for every 10 women. The leading causes of maternal death (ante-partum and postpartum haemorrhage, obstructed labour and eclampsia) can all be addressed with appropriate emergency obstetric care, which often require surgical and/or anaesthesia interventions. Trauma-related mortality, through road traffic accidents, armed fighting and landmine explosions is also common. In 2010 and 2011, WHO reported more than 7500 war-wounded civilians who were admitted to three main hospitals in Mogadishu, one in five being children and one in three women (World Health Organization. Emergency and Essential Surgical Care. 2013. [www.who.int/surgery/en/](http://www.who.int/surgery/en/))

The health sector faces overwhelming challenges in a country where two decades of lawlessness have resulted in the collapse of central government and 3 almost autonomously-ruled zones: northwest Somalia (NWS), known as Somaliland; northeast Somalia (NES), known as Puntland; and south/central Somalia (SCS). Somalia's public health system is tiered, comprising regional referral hospitals, district hospitals, maternal and child health centres and health posts. However, hospitals and health facilities are limited in number, inadequately distributed, operate using vastly different standards, and often cannot provide a minimum package of primary health care (PHC) services. As funders and public health experts adopt the expansion of primary healthcare services, the inclusion of surgical services at the first-referral level is critical. The purpose of this

1  
2  
3 survey was to collect knowledge gained from comprehensive quantitative assessments of  
4 surgical capacity in Somalia in order to assist in planning strategies for universal access  
5 to life-saving and disability-preventing surgical services (World Health Organization.  
6 Emergency and Essential Surgical Care. 2013. [www.who.int/surgery/en/](http://www.who.int/surgery/en/)).  
7  
8

## 9 10 **OBJECTIVE**

11 To assess the current capacity for essential anesthesia and surgical services in Somalia  
12 with the purpose of providing a benchmark for critical areas needing improvement.  
13  
14

## 15 16 **METHODS**

17 The WHO Tool for Situational Analysis to Assess Emergency and Essential Surgical  
18 Care was employed to capture a health facility's capacity to perform basic surgical  
19 (including obstetrics and trauma) and anaesthesia interventions by investigating four  
20 categories of data: infrastructure, human resources, interventions provided and equipment  
21 availability. The tool queries the availability of 8 types of care providers, 35 surgical  
22 interventions and 67 items of equipment.  
23  
24

25 The WHO Tool for Situational Analysis to Assess Emergency and Essential Surgical  
26 Care was distributed by the Ministry of Health and WHO Somalia to the 20 first-referral-  
27 level-health facilities around the country and was completed at 14 health facilities  
28 representing 10 of the 18 regions of Somalia and all 3 administrative zones. The survey  
29 was extended to regional medical officers and facility administrators. The data were  
30 obtained during site visits from the Somalia Ministry of Health (MoH), the WHO country  
31 office and members of the Global Initiative for Emergency and Essential Surgical Care  
32 (GIEESC) between 2011 and 2012, many of whom were in attendance of the WHO  
33 Meeting on Strengthening Surgical and Obstetrics Care in Somalia in April 2012  
34 ([http://www.who.int/surgery/globalinitiative/gieesc\\_country\\_reports/en/index.html](http://www.who.int/surgery/globalinitiative/gieesc_country_reports/en/index.html)).  
35 Participation in the survey and reporting to the WHO was voluntary. Data on various  
36 indices were entered into and analyzed from WHO Global DataCol Database for  
37 Emergency and Essential Surgical Care.  
38  
39  
40

41 Facilities were asked the size of the 'population served', intending to quantify the  
42 population living in the catchment area. This value represents the number of residents  
43 who might use the facility as their first-referral health facility, not the number of patients  
44 seen.  
45  
46  
47  
48

## 49 50 **RESULTS**

- |    |                                          |
|----|------------------------------------------|
| 51 |                                          |
| 52 | <b>i Health facility characteristics</b> |
| 53 | <b>ii Infrastructure</b>                 |
| 54 | <b>iii Human resources</b>               |
| 55 | <b>iv Interventions</b>                  |
| 56 | <b>v Equipment</b>                       |
| 57 |                                          |
| 58 |                                          |
| 59 |                                          |
| 60 |                                          |

Data were gathered from 14 of 20 health facilities in 10 regions (out of 18) across Somalia, as featured figure 1 and table 1.

| Type of Facility (Self-identified)  | Name of Facility            | Region          |
|-------------------------------------|-----------------------------|-----------------|
| <b>General Hospital</b>             | Garowe Hospital             | Nugaal          |
|                                     | Gardo General Hospital      | Bari            |
|                                     | Hergeisa Group Hospital     | Woqooyi Galbeed |
| <b>Provincial Hospital</b>          | Borama General Hospital     | Awdal           |
|                                     | Burao Regional Hospital     | Togdeer         |
|                                     | Berbera Referral Hospital   | Woqooyi Galbeed |
|                                     | Erigavo Regional Hospital   | Sanaag          |
|                                     | Sool Regional Hospital      | Sool            |
| <b>Health Center</b>                | Doolow Health Center        | Gedo            |
| <b>Private/NGO/Mission Hospital</b> | Galkayo Medical Center      | Mudug           |
|                                     | Galkayo Specialist Hospital | Mudug           |
|                                     | Medina Hospital             | Banadir         |
|                                     | Maani Hospital              | Banadir         |
|                                     | Manhal Specialty Hospital   | Woqooyi Galbeed |

**Table 1.** Participating health facilities. N=14

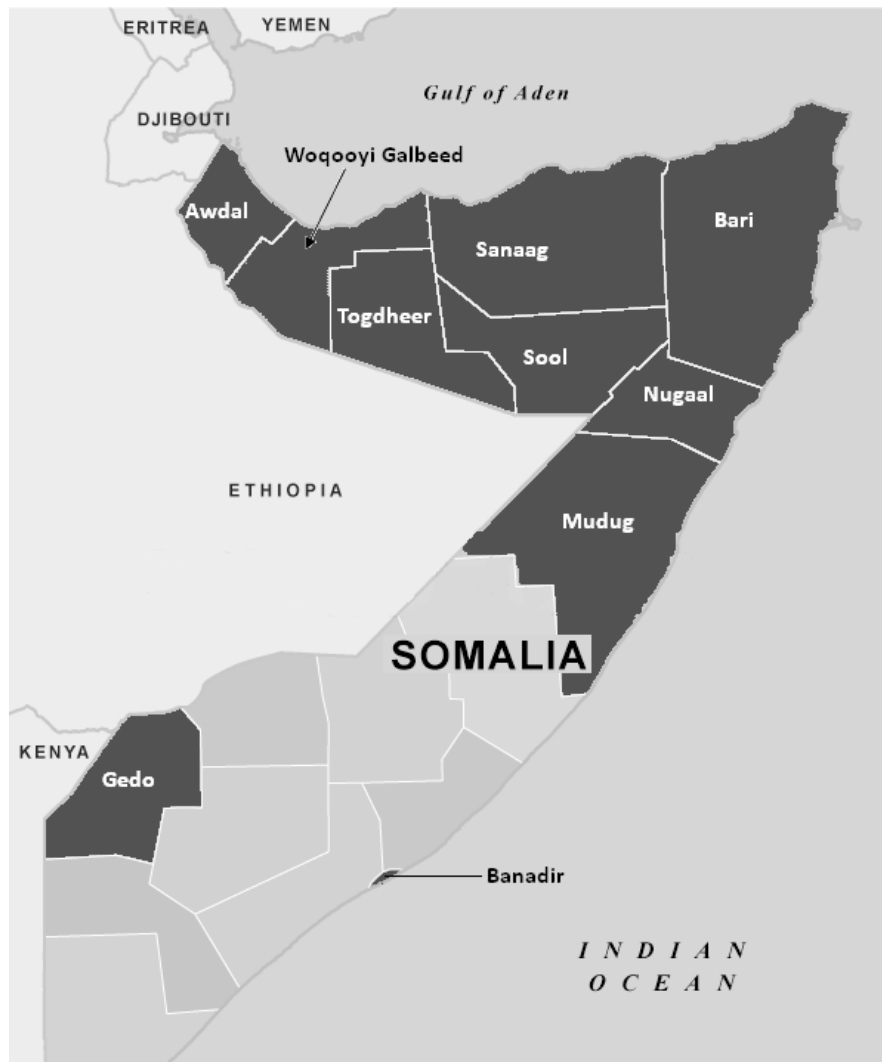

Figure 1. Participating regions of Somalia.

### i. Health facility characteristics

Of the 14 facilities that responded to the survey 5 were provincial hospitals, 5 were private/mission/NGO hospitals, 3 were general hospitals and 1 was a health center. Each facility reported having at least 1 operating theatre, with a maximum of between 11 and 20 operating theatres. The populations served by each facility ranged from 100,000 to 1,000,000 people, with the average of the reporting facilities being 331,250 people.

### ii. Infrastructure

The emergency and surgical infrastructure of the 14 reporting facilities were largely inadequate, with only 22% of health facilities having oxygen cylinder supplies consistently available. 28% of facilities never or only sometimes had access to running water available and only 50% had a consistently available electricity source. Only 50% of

the facilities had fully available access to both running water and electricity. Access to a functional anaesthesia machine was only present in 2 (15%) of the 14 facilities, one of those facilities being a local health center. Only 3 facilities had access to a functioning pulse oximeter.

50% of facilities had areas designated always for emergency care and only 38% of facilities had the same for postoperative care.

A minority of facilities had formal management guidelines for emergency care (3/14 = 21%), surgery (5/14 = 36%), anaesthesia (4/14 = 29%), or pain relief (1/14 = 7%).

Table 2 depicts the key infrastructural elements available in the health facilities accessed.

|                                          | Always | Sometimes | Not Available |
|------------------------------------------|--------|-----------|---------------|
| Oxygen cylinder                          | 22     | 7         | 71            |
| Running water                            | 72     | 14        | 14            |
| Electricity source                       | 50     | 36        | 14            |
| Operational power generator              | 50     | 36        | 14            |
| Functioning anaesthesia machine          | 15     | 15        | 70            |
| Medical records                          | 71     | 21        | 7             |
| Area designated for emergency care       | 50     | 14        | 36            |
| Area designated for postoperative care   | 38     | 8         | 54            |
| Management Guidelines for Emergency Care | 21     | 7         | 72            |
| Management Guidelines for Surgery        | 36     | 0         | 64            |
| Management Guidelines for Anaesthesia    | 29     | 7         | 64            |
| Management Guidelines for Pain relief    | 7      | 21        | 72            |
| Blood bank                               | 36     | 21        | 43            |
| Haemoglobin & urine testing              | 86     | 14        | 0             |
| X-ray machine                            | 57     | 29        | 14            |

**Table 2. Availability of infrastructure and health resources in Somalia, 2012**  
% of facilities where element is always, sometimes, or never available. N=14

### iii. Human Resources

More data is needed to comment on the Health Human Resources in Somalia. The 14 facilities reported a total of 137 healthcare providers. Only 15 (10.9%) individuals were identified as full time trained surgical specialists, located only at 9 out of 14 of the facilities. 14 (10.9%) were identified as obstetricians, and only 4 (2.9%) individuals were identified as qualified anesthesiologists and were located in only 3 of the 14 facilities, with 27 (19.7%) unlicensed medical staff (Nurses, medical assistants, etc.) providing anesthetic services.



#### iv. Interventions

Of the 35 basic interventions listed in the tool, only suturing and abscess incision and drainage are offered at all 14 facilities. Additionally, acute burn management, wound debridement, hydrocele treatment, and male circumcision are widely provided by the surveyed facilities being offered at 86%, 85%, 86%, 86%, of all facilities respectively. Caesarean section is offered at 93% of all facilities (n=14).

Provision of anaesthesia services was severely lacking, however, with only 36% of facilities able to perform general anaesthesia inhalational procedures. Of the 8 facilities that reported back why they could not provide this service, 1 attributed it to lack of skill, 4 to lack of supplies/drugs, and 2 to a lack of equipment. 1 facility attributed it both to lack of skill and lack of equipment.

The ability of each health facility to provide basic surgical and anaesthesia procedures was assessed (table 3).

| General surgery & trauma                                                                                       | Available |
|----------------------------------------------------------------------------------------------------------------|-----------|
| Resuscitation (airway, haemorrhage, peripheral percutaneous intravenous access, peripheral venous cut down)    | 79        |
| Cricothyroidotomy/ Tracheostomy                                                                                | 71        |
| Chest tube insertion                                                                                           | 64        |
| Removal of foreign body (throat/ear/eye/nose)                                                                  | 79        |
| Acute burn management                                                                                          | 86        |
| Incision & drainage of abscess                                                                                 | 100       |
| Suturing (for wounds, episiotomy, cervical & vaginal lacerations)                                              | 100       |
| Wound debridement                                                                                              | 85        |
| Caesarean section                                                                                              | 93        |
| Dilatation & curettage (gynaecology/obstetrics)                                                                | 92        |
| Obstetric fistula repair                                                                                       | 50        |
| Appendectomy                                                                                                   | 79        |
| Hernia repair (strangulated, elective)                                                                         | 71        |
| Hydrocele                                                                                                      | 86        |
| Cystostomy                                                                                                     | 64        |
| Urethral stricture dilatation                                                                                  | 79        |
| Laparotomy (uterine rupture, ectopic pregnancy,, acute abdomen, intestinal obstruction, perforation, injuries) | 86        |
| Male circumcision                                                                                              | 86        |
| Congenital hernia repair                                                                                       | 69        |
| Neonatal surgery (abdominal wall defect, colostomy imperforate anus, intussusceptions)                         | 39        |
| Cleft lip repair                                                                                               | 71        |

|                                            |        |      |
|--------------------------------------------|--------|------|
| Clubfoot repair                            | 64     |      |
| Contracture release/ skin grafting         | 71     |      |
| Fracture treatment                         | Closed | Open |
|                                            | 71     | 57   |
| Joint dislocation treatment                | 64     |      |
| Drainage of osteomyelitis/septic arthritis | 64     |      |
| Amputation                                 | 79     |      |
| Biopsy (lymph node, mass, other)           | 57     |      |
| Tubal ligation/vasectomy                   | 64     |      |
| Cataract surgery                           | 29     |      |
| <b>Anaesthesia</b>                         |        |      |
| Regional anaesthesia blocks                | 43     |      |
| Spinal anaesthesia                         | 93     |      |
| Ketamine intravenous anaesthesia           | 93     |      |
| General anaesthesia inhalational           | 36     |      |

**Table 3. Availability of surgical (including obstetrics and trauma) and anaesthesia interventions.** % of facilities which offer the procedure. N=14

#### v. Emergency equipment and supplies for resuscitation

Basic equipment access was also lacking. No facility had access to all pieces of basic and essential surgical equipment listed on the tool. Only 1 hospital (7%) always had adult resuscitator bag valves and masks always available, and only 2 out of 14 facilities (14%) reported the same for paediatric bag valves and masks. 64% of facilities had access to oxygen only sometimes or never, and less than 30% had oropharyngeal airways available always for both adults and children. 39% of institutions were without an examination table.

Basic tools such as suction catheters, IV cannulas, and Foley catheters were only consistently available in less than 30% of all facilities.

57 % of facilities did not have sterile gloves consistently available, and 64% reported the same for examination gloves. Only 64% of the reporting institutions had a sterilizer available all the time. 71% could not make face masks available, and 86% were without consistent availability of eye protection. Availability of soap and wash basins was reported in less than two thirds of the 14 facilities.

The availability of emergency equipment and supplies was assessed in each of the health facilities (depicted in table 4).

| Capital Outlays               | Always | Sometimes | Never |
|-------------------------------|--------|-----------|-------|
| Resuscitator bag valve & mask |        |           |       |
| Adult                         | 7      | 50        | 43    |
| Paediatric                    | 14     | 36        | 50    |
| Oxygen                        | 36     | 28        | 36    |

|                                                  |    |    |    |
|--------------------------------------------------|----|----|----|
| Stethoscope                                      | 75 | 25 | 0  |
| Batteries for flash light                        | 57 | 14 | 29 |
| Suction pump                                     | 79 | 21 | 0  |
| Blood pressure monitoring equipment              | 71 | 21 | 7  |
| Thermometer                                      | 71 | 21 | 7  |
| Scalpel Handle with blade                        | 64 | 29 | 7  |
| Retractor                                        | 54 | 46 | 0  |
| Scissors straight 12cm                           | 57 | 36 | 7  |
| Scissors blunt 14cm                              | 54 | 46 | 0  |
| Oropharyngeal airway                             |    |    |    |
| Adult                                            | 29 | 42 | 29 |
| Paediatric                                       | 28 | 36 | 36 |
| Forceps Kocher no teeth                          | 38 | 54 | 8  |
| Forceps, artery                                  | 57 | 43 | 0  |
| Kidney dishes stainless steel                    | 46 | 46 | 7  |
| Capped bottle, alcohol based solutions           | 33 | 42 | 25 |
| Gloves (sterile)                                 | 43 | 50 | 7  |
| Gloves (examination)                             | 36 | 57 | 7  |
| Needle holder                                    | 64 | 36 | 0  |
| Sterilizer                                       | 64 | 36 | 0  |
| Nail brush, scrubbing surgeon's                  | 54 | 38 | 8  |
| Vaginal speculum                                 | 64 | 14 | 22 |
| Bucket, plastic                                  | 33 | 33 | 33 |
| Drum for sterile compresses, bandages, dressings | 61 | 31 | 8  |
| Examination table                                | 61 | 31 | 8  |
| <b>Renewable</b>                                 |    |    |    |
| Suction catheter sizes 16 FG                     | 15 | 39 | 46 |
| Tongue depressor wooden disposable               | 23 | 54 | 23 |
| Nasogastric tubes 10 to 16 FG                    | 14 | 72 | 14 |
| Light source (lamp & flash light)                | 29 | 64 | 7  |
| Intravenous fluid infusion set                   | 21 | 65 | 14 |
| IV cannulas                                      | 29 | 57 | 14 |
| Scalp vein infusion set                          | 23 | 54 | 23 |
| Syringes 2ml                                     | 29 | 64 | 7  |
| Syringes 10 ml                                   | 29 | 71 | 0  |
| Disposable needles                               | 36 | 57 | 7  |
| Sharps disposal container                        | 36 | 57 | 7  |
| Tourniquet                                       | 31 | 62 | 7  |
| Sterile gauze dressing                           | 23 | 52 | 15 |
| Bandages sterile                                 | 23 | 54 | 23 |
| Adhesive tape                                    | 23 | 69 | 8  |
| Needles, cutting & round bodied (for suturing)   | 29 | 57 | 14 |
| Suture synthetic absorbable                      | 31 | 46 | 23 |

|                                                        |    |    |    |
|--------------------------------------------------------|----|----|----|
| Splints for arm, leg                                   | 14 | 57 | 29 |
| Towel cloth                                            | 15 | 62 | 23 |
| Absorbent cotton wool                                  | 15 | 77 | 8  |
| Urinary catheter Foleys disposable #12, 14,18 with bag | 23 | 54 | 23 |
| Sheeting, plastic for examination table                | 29 | 50 | 21 |
| Waste disposal container                               | 29 | 57 | 14 |
| Face masks                                             | 29 | 57 | 14 |
| Eye protection                                         | 14 | 36 | 50 |
| Apron, plastic reusable                                | 22 | 64 | 14 |
| Soap                                                   | 36 | 64 | 0  |
| Wash basin                                             | 31 | 62 | 7  |
| <b>Supplementary equipment</b>                         |    |    |    |
| Magills forceps                                        |    |    |    |
| Adult                                                  | 21 | 14 | 64 |
| Paediatric                                             | 7  | 16 | 77 |
| Endotracheal tubes                                     | 8  | 15 | 77 |
| IV infusor bags                                        | 8  | 15 | 77 |
| Chest tubes insertion equipment                        | 8  | 23 | 69 |
| Laryngoscope                                           |    |    |    |
| Adult                                                  | 23 | 23 | 54 |
| Paediatric                                             | 8  | 23 | 69 |
| Cricothyroidotomy set                                  | 8  | 8  | 84 |

**Table 4. Availability of Emergency Equipment and Supplies for Resuscitation.**

% of facilities where element is always, sometimes, or never available. N=14

## DISCUSSION

Surgically treatable diseases are among the top 15 causes of disability,[7] and conservative estimates show that 11% of the world's Disability-Adjusted life years (DALYs) stem from surgically treated conditions.[1] In 2004, South East Asia and Africa accounted for 54% of the global burden,[8] and since then the burden of surgical disease is thought to be increasing.[7]

More than 2 billion people globally are without access to surgical care.[9] Of the 243 million surgical procedures performed globally each year, the 34.8% of the world's population living in low-income countries only have access to 8.1 million (only 3.5%) of such procedures.[2] As a result, rates of maternal mortality are high, minor surgical pathologies become lethal, and treatable trauma progresses to death.

Despite the great unmet need and inclusion in policy-level dialogue on primary health care, the delivery of emergency surgical care has long been sidelined in global financing and policy debates, largely due to perceived complexity and cost. Further, despite the large and growing need for expanding access to surgical care, human resources, metrics and science focused on global surgery, and sustained financing mechanisms for surgical infrastructure lag behind other public health priorities (Smith-Rohrberg Maru, D, McGee,

1  
2  
3 HM, Brady, JS et al. Global Surgical Care in 2030: Metrics and Strategies for Expansion  
4 in Access and Quality. 2013. [www.worldwewant2015.org/file/298623/download/323967](http://www.worldwewant2015.org/file/298623/download/323967))  
5  
6

7 Enormous shortfalls in infrastructure, supplies, and procedures undertaken are common at  
8 district-level health facilities in LMICs.[10] Every \$1 spent strengthening local surgical  
9 capacity generates \$10 through improved health and increased productivity.[11] In 2008,  
10 the Copenhagen Consensus Center's research identified strengthening surgical capacity,  
11 particularly at the district hospital level, as a highly cost-efficient solution to global  
12 diseases. Notably, strengthening local surgical capacity is an approach that would both  
13 provide a high degree of financial protection to populations and address the most DALYs  
14 in a cost effective manner.[1] In fact, the benefit-cost-ratio for the expansion of surgical  
15 capacity at district hospitals was found to be 10:1.[12] Further, due to the implementation  
16 of "vertical" programmes in public health (i.e. child health, maternal health, cancer, and  
17 trauma), in which most programmes contain some surgical component, strengthening  
18 surgical services may improve health system overall.[13]  
19  
20  
21

22 This study provides an overview of the capacity for surgical care representing health  
23 facilities from in all 3 administrative zones, including 10 regions of 18 in Somalia, and  
24 demonstrates the significant gaps in infrastructure, life-saving and disability-preventive  
25 surgical interventions and essential equipment. Of the 14 reporting health facilities, 12  
26 identified as full hospitals, serving an average patient population of over 300,000 people,  
27 further indicating the need for surgical care system strengthening.  
28

29 Of the 35 basic surgical and anaesthesia interventions, most hospitals were unable to  
30 provide all of the basic surgical services. Major essential procedures such as Caesarean  
31 section, appendectomy, elective hernia repair, laparotomy, and hydrocele were offered at  
32 a majority of hospitals, but these conflicted directly with the continuous availability of  
33 basic and necessary supplies and infrastructures. Only 3 facilities had any consistent  
34 access to oxygen cylinders, and even less reported access to tubing, valves, and masks.  
35  
36

37 Necessary procedures including resuscitation and airway management were offered at a  
38 majority (79%) of facilities. Those reporting the inability to provide resuscitation  
39 procedures, however, all reported the provision of major surgical procedures that would  
40 require provision and knowledge of those same procedures. The facilities in questions  
41 could not be contacted for confirmation.  
42  
43

44 Still, many facilities lacked access to key equipment and supplies such as provisional  
45 oxygen equipment, oropharyngeal airways, and IV cannulas. Only 2 facilities reported  
46 access to a functional anaesthesia machines, and few facilities noted the ability to provide  
47 general anaesthesia inhalation. Both oxygen and anaesthesia are essential medicines,  
48 (WHO Model List of Essential Medicines. World Health Organizations. 2013.  
49 [http://www.who.int/medicines/publications/essentialmedicines/18th\\_EML\\_Final\\_web\\_8J  
50 ul13.pdf](http://www.who.int/medicines/publications/essentialmedicines/18th_EML_Final_web_8Jul13.pdf)) and the existing deficit limits the availability safe and effective life-saving  
51 surgeries in Somalia or can result in significant complication or unnecessary patient  
52 suffering when these medicines are not provided.[14]  
53  
54

55 A surprising low amount of facilities reported having access to equipment necessary for  
56 the prevention of HIV transmission and other infection control. Less than half of the  
57  
58  
59  
60

1  
2  
3 facilities reported access to sterile gloves, waste disposal containers, face masks, eye  
4 masks, aprons, and even soap and only slight more than half of the facilities had access to  
5 a sterilizer, all key components in the reduction of HIV transmission (WHO Prevention  
6 of Transmission of HIV. 2007.

7  
8 <http://www.who.int/surgery/publications/HIVprevention.pdf>  
9

10 A majority of the facilities lacked any formal guidelines for the management of  
11 emergency care, surgery, pain relief, or anaesthesia, providing a significant barrier to the  
12 strengthening of emergency and surgical care services and severely limiting their ability  
13 to respond to large scale disaster and crisis situations.  
14

15  
16 The provision of safe and effective surgical care is dependent on the presence of all  
17 components inherent in a functional health system. Systematic investments and changes  
18 that address and strengthen the availability of appropriately trained human resources,  
19 capital outlays, and necessary infrastructure are necessary to decrease mortality from  
20 surgically treatable conditions. Further, strengthening of surgical systems will not only  
21 reduce the disease burden of surgically related issues but can also increase progress  
22 toward achieving the 2015 Millennium Development Goals (MDGs). Strengthening  
23 surgical care delivery can help achieve MDGs 1 (eradication of poverty),[9] 4 (child  
24 health), 5 (maternal health), and 6 (HIV/AIDS prevention).[12] Systematic changes such  
25 and investments in oxygen and related equipment and appropriately trained surgical  
26 workforce will also serve to benefit patients suffering from a range of conditions  
27 including sepsis, pneumonia, HIV-related conditions and other infectious diseases.  
28  
29  
30  
31  
32  
33

34 To meet the needs of LMICs, the WHO Emergency and Essential Surgical Care (EESC)  
35 program with its partners worldwide developed the *Integrated Management for*  
36 *Emergency and Essential Surgical Care* (IMEESC) toolkit (WHO IMEESC Toolkit:  
37 <http://www.who.int/surgery/en>). It guides policies, research for evidence-based planning  
38 (WHO EESC Situation Analysis Tool to assess emergency, trauma, obstetrics, anesthesia  
39 and surgical services, WHO EESC Global Database), trainings, best practice protocols at  
40 point-of-care, monitoring and evaluation of the progress of surgical care systems. The  
41 IMEESC toolkit provides guidance for policymakers, managers, and providers at various  
42 levels of care, instructional videos, training modules on Emergency & Trauma Care for  
43 frontline health workers, disaster- management resources, and monitoring and evaluation.  
44  
45  
46  
47  
48

49 There are a several limitations to this survey. First, it provides only a brief overview of  
50 the capacity for surgical care and cannot be used for detailed programme planning.  
51 Second, it does not capture data from every first-referral health facility of the country;  
52 however, a majority of first-referral health facilities identified by the MoH and WHO  
53 Somalia have responded, allowing us to provide a glimpse into the state of basic surgical  
54 capacity in the country. Third, some of the data was taken after the WHO IMEESC  
55  
56  
57  
58  
59  
60

1  
2  
3 toolkit was implemented in the country, and results should be qualified by the possibility  
4 of interpretation constraints of the survey.  
5  
6

7  
8 However, this study provides insight into the surgical capacity of Somalia, using the  
9 WHO Tool for Situational Analysis to Assess Emergency and Essential Surgical Care.  
10 The survey identified significant gaps and areas for improvement towards evidence-based  
11 planning to improve surgical infrastructure, skills training, and equipment and supplies.  
12 Addressing these gaps and the strengthening of surgical services within existing related  
13 national programmes are needed to strengthen health systems as a whole, particularly at  
14 the district and sub-district level.[15] Further research is needed to determine the burden  
15 of surgical disease in Somalia and to determine the cost-benefit of specific interventions  
16 to improve surgical services.  
17  
18  
19

20  
21 **Disclaimer:** The authors include staff members of WHO. They are responsible for the  
22 views expressed in this publication and do not necessarily represent the decisions or  
23 stated policy of WHO.  
24

25  
26 **Contributors:** NE analyzed and interpreted the data, drafted the article, revised it and  
27 finally approved the submitted version. AS analyzed and interpreted the data, drafted the  
28 article, revised it and finally approved the submitted version. MC contributed to  
29 conception and design, acquisition and interpretation of data, helped draft the article,  
30 made critical revisions and finally approved the submitted version. OS contributed to  
31 acquisition of data, made critical revisions and finally approved the submitted version.  
32 ME contributed to acquisition of data, made critical revisions and finally approved the  
33 submitted version. GP contributed to acquisition of data, made critical revisions and  
34 finally approved the submitted version. AI contributed to acquisition of data, made  
35 critical revisions and finally approved the submitted version.  
36

37  
38 **Acknowledgements:** The following members of GIEESC in Somalia were instrumental  
39 in obtaining the reported data: Yassin Arab Abdi, Dr. Nima Abdi Hassan, Mohamed  
40 Samy Salama, Dr. Mahmoud Mostafa El-Antably, Dr. Soleh Abdullah Omar, Jamal  
41 Mohamed Jama, Abdulcadir Mohamud Giama, Nura Mohamed Ahmed, Saeed Hussien  
42 Legeh, Risaaq Mohamoud Yousuf, Cabdi Qaadu Bikri, Ahmed Jama, Dr. Muse Geele,  
43 Noor M. Noor.  
44

45  
46 **Funding Statement:** This research received no specific grant from any funding agency  
47 in the public, commercial or not-for-profit sectors.  
48

49 **Competing interests:** None.

50 **Data sharing statement:** No additional data are available, all has been included.  
51  
52

## 53 REFERENCES

54  
55  
56  
57  
58  
59  
60

- 1
  - 2
  - 3
  - 4
  - 5
  - 6
  - 7
  - 8
  - 9
  - 10
  - 11
  - 12
  - 13
  - 14
  - 15
  - 16
  - 17
  - 18
  - 19
  - 20
  - 21
  - 22
  - 23
  - 24
  - 25
  - 26
  - 27
  - 28
  - 29
  - 30
  - 31
  - 32
  - 33
  - 34
  - 35
  - 36
  - 37
  - 38
  - 39
  - 40
  - 41
  - 42
  - 43
  - 44
  - 45
  - 46
  - 47
  - 48
  - 49
  - 50
  - 51
  - 52
  - 53
  - 54
  - 55
  - 56
  - 57
  - 58
  - 59
  - 60
1. Debas HT, Gosselin R, McCord C, et al. Surgery. In: Jamison D, ed. Disease Control Priorities in Developing Countries. 2<sup>nd</sup> edn. New York: Oxford University Press, 2006:1245-59.
  2. Weiser TG, Regenbogen SE, Thompson KD, et al. An estimation of the global volume of surgery: a modelling strategy based on available data. *Lancet* 2008;**372**:139-44.
  3. World Health Organisation. Regional Office for the Eastern Mediterranean, Cairo. Country Cooperation Strategy for WHO and Somalia 2010-2014. 2010.
  4. UNICEF. The private sector and health: a survey of Somaliland private pharmacies. 2008.
  5. UNDP. Population projections. 2007.
  6. UNDP. Millennium Development Goals Report for Somalia. 2007
  7. Farmer P, Kim J. "Surgery and global health: a view from beyond the OR." *World J Surg* 2008; 32(4):533-536.
  8. Johnson, WD. Surgery as a Global Health Issue. *Surg Neurol Int*. First: 03 April 2013. doi:10.4103/2152-7806.110030
  9. Funk, LM, Weiser, TG, Berry, WR, et al. "Global Operating Theatre Distribution and Pulse Oximetry Supply: an Estimation from Reported Data." *Lancet*. 2010;**376**(9746): 1055-1061.
  10. Kushner AI, Cherian MN, Shokohmand, AS, et al. Addressing the Millennium Development Goals from a surgical perspective: essential surgery and anesthesia in 8 low- and middle-income countries. *Arch Surg* 2010;**145**(2): 154-159.
  11. United Nations. A New Global Partnership: Eradicate Poverty And Transform Economies Through Sustainable Development: The Report of the High-Level Panel of Eminent Persons on the Post-2015 Development Agenda. United Nations Publication 2013.
  12. Jamison, D, Jha, P, Bloom, D. Diseases – disease control. In: Lomborg, B. Global Crises, Global Solutions: 2<sup>nd</sup> ed. New York: Cambridge University Press. 2009:129-163.
  13. Ozgediz, D, Jamison, D, McQueen, K. The burden of surgical conditions and access to surgical care in low- and middle-income countries. *Bull World Health Organ* 2008;**86**(8):646-647
  14. Cherian, MN, Merry, AF, Wilson, IH. The World Health Organization and Anaesthesia. *Anaesthesia*, 2007;**62**:65-66
  15. Hedges JP, Mock CN, Cherian MN. The Political Economy of emergency and essential surgery in global health. *World J Surg* 2010;**34**:2003–2006. [PubMed: 20454792]



1  
2  
3  
4  
5  
6  
7  
8  
9  
10  
11  
12  
13  
14  
15  
16  
17  
18  
19  
20  
21  
22  
23  
24  
25  
26  
27  
28  
29  
30  
31  
32  
33  
34  
35  
36  
37  
38  
39  
40  
41  
42  
43  
44  
45  
46  
47  
48  
49  
50  
51  
52  
53  
54  
55  
56  
57  
58  
59  
60

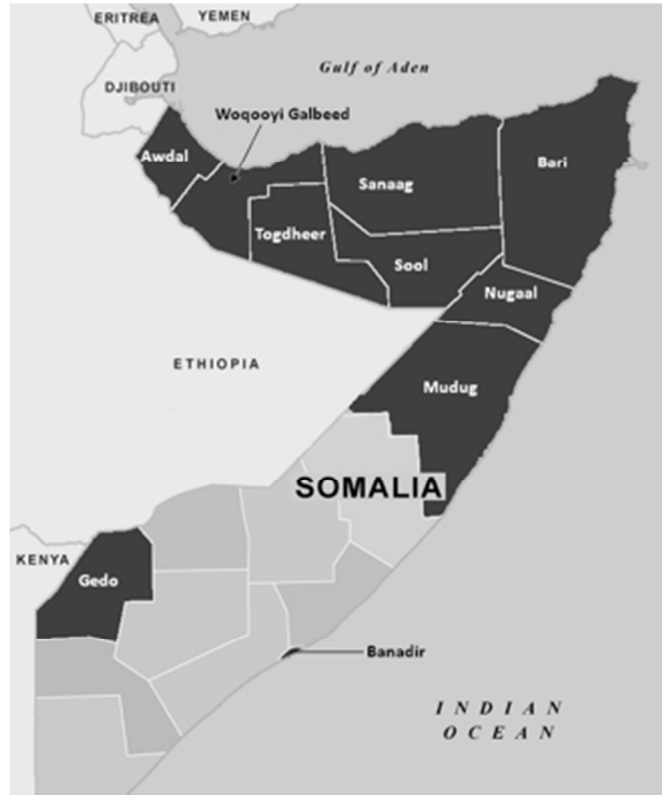

Figure 1: Participating regions of Somalia  
117x140mm (72 x 72 DPI)

ew only



## A Survey of Essential Surgical Capacity in Somalia

|                                 |                                                                                                                                                                                                                                                                                                                                                                                         |
|---------------------------------|-----------------------------------------------------------------------------------------------------------------------------------------------------------------------------------------------------------------------------------------------------------------------------------------------------------------------------------------------------------------------------------------|
| Journal:                        | <i>BMJ Open</i>                                                                                                                                                                                                                                                                                                                                                                         |
| Manuscript ID:                  | bmjopen-2013-004360.R1                                                                                                                                                                                                                                                                                                                                                                  |
| Article Type:                   | Research                                                                                                                                                                                                                                                                                                                                                                                |
| Date Submitted by the Author:   | 09-Jan-2014                                                                                                                                                                                                                                                                                                                                                                             |
| Complete List of Authors:       | Elkheir, Natalie; St George's Hospital, London, Sharma, Akshay; Harvard University, Harvard College<br>Cherian, M; World Health Organization, Emergency and Essential Surgical Care<br>Saleh, Omar; World Health Organization Somalia, Everard, Marthe; World Health Organization Somalia, Popal, Ghulam; World Health Organization Somalia, Ibrahim, Abdi; Ministry of Health Somalia, |
| <b>Primary Subject Heading</b>: | Surgery                                                                                                                                                                                                                                                                                                                                                                                 |
| Secondary Subject Heading:      | Anaesthesia, Global health, Health services research, Obstetrics and gynaecology, Medical management                                                                                                                                                                                                                                                                                    |
| Keywords:                       | ANAESTHETICS, Health & safety < HEALTH SERVICES ADMINISTRATION & MANAGEMENT, Quality in health care < HEALTH SERVICES ADMINISTRATION & MANAGEMENT, MEDICAL EDUCATION & TRAINING, SURGERY, WOUND MANAGEMENT                                                                                                                                                                              |
|                                 |                                                                                                                                                                                                                                                                                                                                                                                         |

SCHOLARONE™  
Manuscripts

only

# A Survey of Essential Surgical Capacity in Somalia

## Corresponding Author:

Akshay Sharma  
254 Cabot Mail Center  
Cambridge, MA USA  
Phone: 001-949-735-4736  
Email: akshay1227@gmail.com

## Co-Authors:

Dr. Natalie Elkheir<sup>1</sup>; Akshay Sharma<sup>2</sup>; Dr. Meena Cherian<sup>3</sup>; Dr. Omar Abdelrahman Saleh<sup>4</sup>; Dr. Marthe Everard<sup>5</sup>; Dr. Ghulam Rabani Popal<sup>6</sup>; Dr Abdi Awad Ibrahim<sup>7</sup>

<sup>1</sup>St. George's Hospital, London, United Kingdom

<sup>2</sup>Harvard College, Harvard University, Cambridge, Massachusetts, USA

<sup>3</sup>Emergency & Essential Surgical Care Programme, Health Systems and Innovation, World Health Organization - HQ, Geneva, Switzerland

<sup>4</sup>EHA Coordinator, World Health Organization Somalia, Nairobi, Kenya

<sup>5</sup>World Health Organization Somalia, Nairobi, Kenya

<sup>6</sup>WHO Representative Somalia, World Health Organization Somalia, Nairobi, Kenya

<sup>7</sup>Resident Advisor to the Minister of Health Somalia, Ministry of Health Somalia, Mogadishu, Somalia

**Keywords:** Surgery, Somalia, Emergency, Anaesthesia, Trauma

**Word count:** 2,679

## ABSTRACT

**Objective:** The objective of this study was to assess life-saving and disability-preventing surgical services (including emergency, trauma, obstetrics, anaesthesia) of health facilities in Somalia and to assist in the planning of strategies for strengthening surgical care systems.

**Design:** Cross-sectional survey

**Setting:** Health facilities in all 3 administrative zones of Somalia: northwest Somalia (NWS), known as Somaliland; northeast Somalia (NES), known as Puntland; and south/central Somalia (SCS).

**Participants:** 14 health facilities

**Measures:** The WHO Tool for Situational Analysis to Assess Emergency and Essential Surgical Care was employed to capture a health facility's capacity to deliver surgical and anaesthesia services by investigating four categories of data: infrastructure; human resources; interventions available; and equipment.

**Results:** The 14 facilities surveyed in Somalia represent 10 of 18 districts throughout the country. The facilities serve an average patient population of 331,250 people, and 12 of 14 identify as hospitals. While major surgical procedures were provided at many facilities (Caesarean Section, Laparotomy, Appendectomy, etc.), only 22% had fully available oxygen access, 50% fully available electricity, and less than 30% had any management guidelines for emergency and surgical care. Further, only 36% were able to provide general anaesthesia inhalation due to lack of skills, supplies, and equipment. Basic supplies for airway management and the prevention of infection transmission were severely lacking in most facilities.

**Conclusions:** According to the results of the WHO Tool for Situational Analysis to Assess Emergency and Essential Surgical Care survey, there exist significant gaps in the capacity of emergency and essential surgical services in Somalia including inadequacies in essential equipment, services, and infrastructure. The information provided by this tool can serve as a basis for evidenced-based decisions on country-level policy regarding the allocation of resources and provision of emergency and essential surgical services.

## ARTICLE SUMMARY

### Article Focus

- On-site visits to primary health centres in a developing nation
- Evaluate capacity to deliver emergency and essential surgical care

### Strengths and limitations of this study

- Provides insight into the surgical capacity of Somalia
- Identifies significant gaps and areas for improvement towards evidence-based planning to improve surgical infrastructure, skills training, and equipment and supplies
- Does not capture data from every first-referral health facilities of the country
- Measures are subjective and in some cases estimates

## INTRODUCTION

Conditions that can be treated with surgery account for an estimated 11% of the world's disability-adjusted life years.[1] Despite recent data estimating the global volume of surgery at 234 million surgical procedures annually and significant disparities between procedures performed in high- and low- income countries, global public health initiatives have traditionally neglected the necessity for the provision of surgical services.[2] Poor access to surgical services, particularly at rural facilities, results in excess morbidity and mortality from a broad range of treatable surgical conditions including injuries, complications of pregnancy, sequelae of infectious diseases, acute abdominal conditions and congenital anomalies. Improving the access to surgical services in low-income countries requires addressing gaps in infrastructure, trained/skilled personnel, appropriate equipment and medications.

## BACKGROUND

Somalia's 21 years of war, armed conflict and insecurity have had a devastating effect on the health sector. The current situation is at its worst level since the beginning of the civil war in 1991, with unprecedented levels of child malnutrition, internal displacement, as well as conflict and insecurity rife in some parts of the country.[3] Continuing conflict has left 90% of health infrastructure looted, damaged or destroyed.[4] The low health workforce ratios before the war have depreciated through high levels of healthcare worker emigration, leaving an estimated 3 physicians per 100000 population (total 253 physicians), 11 nurses per 100 000 population (861 nurses) and 2 midwives per 100 000 population (116 midwives) serving the whole country.[5]

Rates of death and disability from treatable surgical conditions continue to be unacceptably high. Somalia's maternal mortality rate is estimated to be 1044 per 100 000 live births, one of the highest in the region.[6] This corresponds to a lifetime risk of one maternal death for every 10 women. The leading causes of maternal death (anteartum and postpartum haemorrhage, obstructed labour and eclampsia) can all be addressed with appropriate emergency obstetric care, which often require surgical and/or anaesthesia interventions. Trauma-related mortality, through road traffic accidents, armed fighting and landmine explosions is also common. In 2010 and 2011, WHO reported more than 7500 war-wounded civilians who were admitted to three main hospitals in Mogadishu, one in five being children and one in three women (World Health Organization. Emergency and Essential Surgical Care. 2013.

[www.who.int/surgery/en/](http://www.who.int/surgery/en/))

The health sector faces overwhelming challenges in a country where two decades of lawlessness have resulted in the collapse of central government and 3 almost autonomously-ruled zones: northwest Somalia (NWS), known as Somaliland; northeast Somalia (NES), known as Puntland; and south/central Somalia (SCS). Somalia's public health system is tiered, comprising regional referral hospitals, district hospitals, maternal

1  
2  
3 and child health centres and health posts. However, hospitals and health facilities are  
4 limited in number, inadequately distributed, operate using vastly different standards, and  
5 often cannot provide a minimum package of primary health care (PHC) services. As  
6 funders and public health experts adopt the expansion of primary healthcare services, the  
7 inclusion of surgical services at the first-referral level is critical. The purpose of this  
8 survey was to collect knowledge gained from comprehensive quantitative assessments of  
9 surgical capacity in Somalia in order to assist in planning strategies for universal access  
10 to life-saving and disability-preventing surgical services (World Health Organization.  
11 Emergency and Essential Surgical Care. 2013. [www.who.int/surgery/en/](http://www.who.int/surgery/en/)).  
12  
13

14  
15 Similar studies using the WHO Situational Analysis tool have been conducted in  
16 Tanzania,[7] Solomon Islands,[8] Gambia,[9] Liberia,[10] Ghana,[11] Afghanistan,[12]  
17 Sri Lanka,[13] Sierra Leone,[14] and Mongolia.[15]  
18

## 19 **OBJECTIVE**

20  
21  
22 To assess life-saving and disability-preventing surgical services (including emergency,  
23 trauma, obstetrics, anaesthesia) of health facilities in Somalia and to assist in the planning  
24 of strategies for strengthening surgical care systems.  
25

26  
27 To assess the current capacity for essential anaesthesia and surgical services in Somalia  
28 with the purpose of providing a benchmark for critical areas needing improvement.  
29

## 30 **METHODS**

31  
32 The WHO Tool for Situational Analysis to Assess Emergency and Essential Surgical  
33 Care was employed to capture a health facility's capacity to perform basic surgical  
34 (including obstetrics and trauma) and anaesthesia interventions by investigating four  
35 categories of data: infrastructure, human resources, interventions provided and equipment  
36 availability. The tool queries the availability of 8 types of care providers, 35 surgical  
37 interventions and 67 items of equipment.[7]  
38

39  
40 The WHO Tool for Situational Analysis to Assess Emergency and Essential Surgical  
41 Care was distributed by the Ministry of Health and WHO Somalia to 20 first-referral-  
42 level-health facilities around the country and was completed at 14 health facilities  
43 representing 10 of the 18 regions of Somalia and all 3 administrative zones. The survey  
44 was extended to regional medical officers and facility administrators. Participation in the  
45 survey and reporting to the WHO was voluntary The physical surveys were then obtained  
46 during either by post directly to the WHO Somalia office (Nairobi, Kenya) or by site  
47 visits from the Somalia Ministry of Health (MoH), the WHO country office and members  
48 of the Global Initiative for Emergency and Essential Surgical Care (GIEESC) between  
49 September 2011 and April 2012, many of whom were in attendance of the WHO Meeting  
50 on Strengthening Surgical and Obstetrics Care in Somalia in April 2012  
51 ([http://www.who.int/surgery/globalinitiative/gieesc\\_country\\_reports/en/index.html](http://www.who.int/surgery/globalinitiative/gieesc_country_reports/en/index.html)). At  
52 this meeting reporting protocol and initial survey data were discussed..  
53  
54  
55  
56  
57  
58  
59  
60

The answer of available was defined as “fully available for all patients all of the time,” while sometimes was defined as “available with frequent shortages or difficulties”.(WHO EESC Situational Analysis Tool. 2012.

[http://www.who.int/surgery/publications/WHO\\_EESC\\_SituationAnalysisTool.pdf](http://www.who.int/surgery/publications/WHO_EESC_SituationAnalysisTool.pdf)

Despite efforts to standardize the reporting and the collection of much of the data by site-visits performed by agents affiliated to the authors, it must be noted that an inherent reporting bias may be present in the data, given that survey data was compiled by different agents at each site. Further, in a limited number of cases, facilities did not respond to individual questions. Blank answers were considered as neither a positive or negative answer, but simply deemed as unreported.

Data were entered into and analyzed from WHO Global DataCol Database for Emergency and Essential Surgical Care.

Facilities were asked the size of the ‘population served’, intending to quantify the population living in the catchment area. This value represents the number of residents who might use the facility as their first-referral health facility, not the number of patients seen.

## RESULTS

- i Health facility characteristics**
- ii Infrastructure**
- iii Human resources**
- iv Interventions**
- v Equipment**

Data were gathered from 14 health facilities in 10 regions (out of 18) across Somalia, as featured figure 1 and table 1.

| Type of Facility (Self-identified) | Name of Facility        | Region          | Number of Beds | Operating Theaters |
|------------------------------------|-------------------------|-----------------|----------------|--------------------|
| <b>General Hospital</b>            | Garowe Hospital         | Nugaal          | 51-80          | 11-20              |
|                                    | Gardo General Hospital  | Bari            | 21-50          | 1                  |
|                                    | Hergeisa Group Hospital | Woqooyi Galbeed | 301-400        | 5-10               |
| <b>Provincial Hospital</b>         | Borama General Hospital | Awdal           | 201-300        | 1                  |
|                                    | Burao Regional Hospital | Togdeer         | 201-300        | 1                  |
|                                    | Berbera Referral        | Woqooyi         | 101-200        | 2                  |

|                                     |                             |                 |         |      |
|-------------------------------------|-----------------------------|-----------------|---------|------|
|                                     | Hospital                    | Galbeed         |         |      |
|                                     | Erigavo Regional Hospital   | Sanaag          | 81-100  | 1    |
|                                     | Sool Regional Hospital      | Sool            | 81-100  | 1    |
| <b>Health Center</b>                | Doolow Health Center        | Gedo            | 5-10    | 1    |
| <b>Private/NGO/Mission Hospital</b> | Galkayo Medical Center      | Mudug           | 51-80   | 3-4  |
|                                     | Galkayo Specialist Hospital | Mudug           | 3-4     | 1    |
|                                     | Medina Hospital             | Banadir         | 201-300 | 5-10 |
|                                     | Maani Hospital              | Banadir         | 21-50   | 1    |
|                                     | Manhal Specialty Hospital   | Woqooyi Galbeed | 51-80   | 5-10 |

**Table 1.** Responding health facilities. N=14



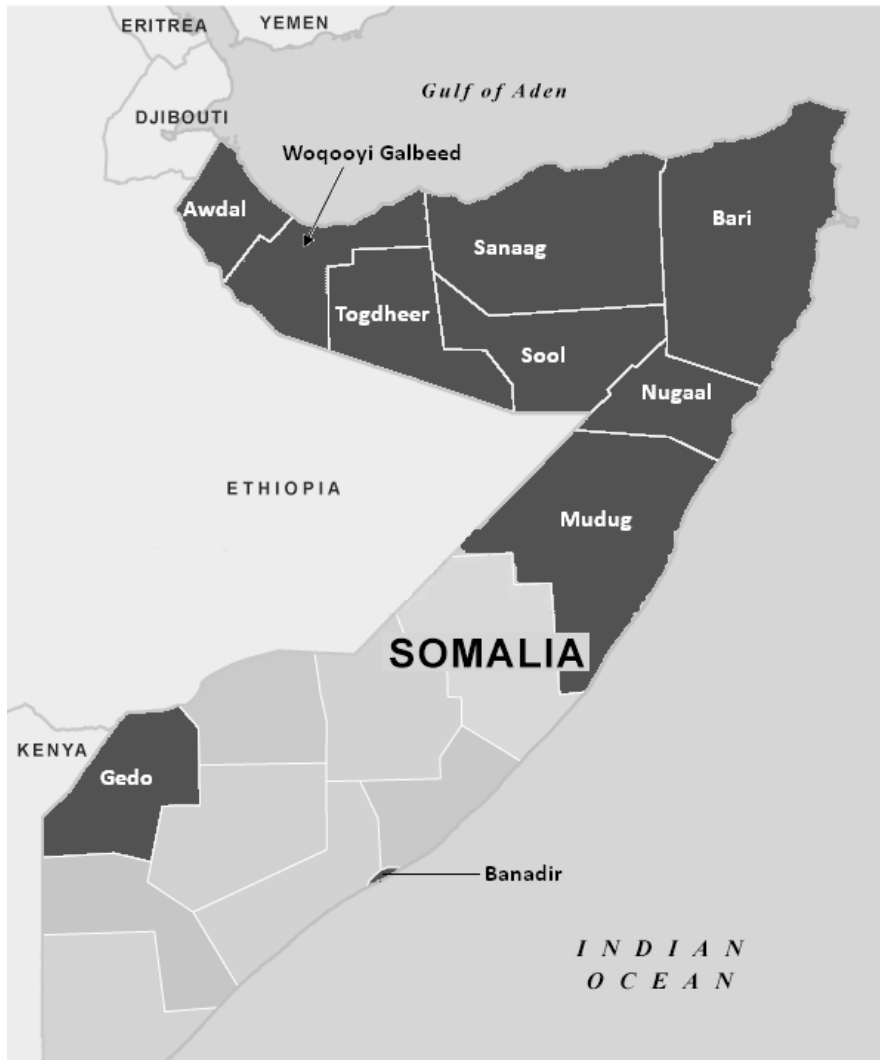

Figure 1. Participating regions of Somalia.

### i. Health facility characteristics

Of the 14 facilities that responded to the survey 5 were provincial hospitals, 5 were private/mission/NGO hospitals, 3 were general hospitals and 1 was a health center. Each facility reported having at least 1 operating theatre, with a maximum of between 11 and 20 operating theatres. The populations served by each facility ranged from 100,000 to 1,000,000 people, with the average of the reporting facilities being 331,250 people.

### ii. Infrastructure

The emergency and surgical infrastructure of the 14 reporting facilities were largely inadequate, with only 22% of health facilities having oxygen cylinder supplies consistently available. 28% of facilities never or only sometimes had access to running water available and only 50% had a consistently available electricity source. Only 50% of the facilities had fully available access to both running water and electricity. Access to a

functional anaesthesia machine was only present in 2 (15%) facilities, one of those facilities being a local health center. Only 3 facilities reported access to a functioning pulse-oximeter.

50% of facilities had areas designated always for emergency care and only 38% of facilities had the same for postoperative care.

A minority of facilities had formal management guidelines for emergency care (3/14 = 21%), surgery (5/14 = 36%), anaesthesia (4/14 = 29%), or pain relief (1/14 = 7%).

Table 2 depicts the key infrastructural elements available in the health facilities accessed.

|                                                 | <b>Always</b> | <b>Sometimes</b> | <b>Not Available</b> |
|-------------------------------------------------|---------------|------------------|----------------------|
| Oxygen cylinder                                 | 3             | 1                | 10                   |
| Running water                                   | 10            | 2                | 2                    |
| Electricity source                              | 7             | 5                | 2                    |
| Operational power generator                     | 2             | 2                | 9                    |
| Blood bank                                      | 5             | 3                | 6                    |
| Hemoglobin & urine testing                      | 12            | 2                | 0                    |
| X-ray machine                                   | 8             | 4                | 2                    |
| Medical records                                 | 10            | 3                | 1                    |
| <b>Pulse Oximeter</b>                           | 3             | 0                | 8                    |
| <b>Area designated for emergency care</b>       | 5             | 1                | 7                    |
| <b>Area designated for postoperative care</b>   | 5             | 1                | 7                    |
| <b>Management Guidelines for Emergency Care</b> | 3             | 1                | 10                   |
| <b>Management Guidelines for Surgery</b>        | 5             | 0                | 9                    |
| <b>Management Guidelines for Anaesthesia</b>    | 4             | 1                | 9                    |
| <b>Management Guidelines for Pain relief</b>    | 1             | 3                | 10                   |
| <b>Functioning anaesthesia machine</b>          | 7             | 5                | 2                    |

**Table 2. Availability of infrastructure and health resources in Somalia, 2012**

Number of facilities where element is always, sometimes, or never available. Bolded items designate those which are specific to quality surgical care delivery. N=14

### iii. Human Resources

More data is needed to comment on the Health Human Resources in Somalia. In this section, blank answers to staffing questions impeded our ability to comment on the state

of the work force completely. We did however summarize the results to survey questions of which all or a majority of facilities supplied data.

The 14 facilities together reported a total of 137 healthcare providers. Only 15 (10.9%) individuals were identified as full time trained surgical specialists, located only at 9 out of 14 of the facilities. 14 (10.9%) were identified as obstetricians, and only 4 (2.9%) individuals were identified as qualified anesthesiologists and were located in only 3 of the 14 facilities, with 27 (19.7%) unlicensed medical staff (Nurses, medical assistants, etc.) providing anesthetic services.

#### iv. Interventions

Of the 35 interventions, only abscess incision and drainage is offered at all 14 facilities. Acute burn management, wound debridement, hydrocele treatment, and male circumcision are widely provided by the surveyed facilities being offered at 86%, 85%, 86%, 86%, of all facilities respectively. Caesarean section is offered at 93% of all facilities (n=14).

Provision of anaesthesia services was severely lacking, however, with only 36% of facilities able to perform general anaesthesia inhalational procedures. Of the 8 facilities that reported back why they could not provide this service, 1(Doolow Health Center) attributed it to lack of skill and 4(Borama General Hospital, Doolow Health Center, Erigavo Regional Hospital, Burao Regional Hospital) to lack of supplies/drugs. 1 (Gardo General Hospital) facility attributed it both to lack of skill and lack of equipment.

The ability of each health facility to provide basic surgical and anaesthesia procedures was assessed (tables 3 and 4).

| General surgery & trauma                                                                                    | Available |
|-------------------------------------------------------------------------------------------------------------|-----------|
| Resuscitation (airway, haemorrhage, peripheral percutaneous intravenous access, peripheral venous cut down) | 11        |
| Cricothyroidotomy/ Tracheostomy                                                                             | 10        |
| Chest tube insertion                                                                                        | 9         |
| Removal of foreign body (throat/ear/eye/nose)                                                               | 11        |
| Acute burn management                                                                                       | 12        |
| Incision & drainage of abscess                                                                              | 14        |
| Suturing (for wounds, episiotomy, cervical & vaginal lacerations)                                           | 13        |
| Wound debridement                                                                                           | 11        |
| Caesarean section                                                                                           | 13        |
| Dilatation & curettage (gynaecology/obstetrics)                                                             | 12        |
| Obstetric fistula repair                                                                                    | 7         |
| Appendectomy                                                                                                | 11        |
| Hernia repair (strangulated, elective)                                                                      | 10        |

|                                                                                                                |        |      |
|----------------------------------------------------------------------------------------------------------------|--------|------|
| Hydrocele                                                                                                      | 12     |      |
| Cystostomy                                                                                                     | 9      |      |
| Urethral stricture dilatation                                                                                  | 11     |      |
| Laparotomy (uterine rupture, ectopic pregnancy,, acute abdomen, intestinal obstruction, perforation, injuries) | 12     |      |
| Male circumcision                                                                                              | 12     |      |
| Congenital hernia repair                                                                                       | 9      |      |
| Neonatal surgery (abdominal wall defect, colostomy imperforate anus, intussusceptions)                         | 5      |      |
| Cleft lip repair                                                                                               | 10     |      |
| Clubfoot repair                                                                                                | 9      |      |
| Contracture release/ skin grafting                                                                             | 10     |      |
| Fracture treatment                                                                                             | Closed | Open |
|                                                                                                                | 10     | 8    |
| Joint dislocation treatment                                                                                    | 9      |      |
| Drainage of osteomyelitis/septic arthritis                                                                     | 9      |      |
| Amputation                                                                                                     | 11     |      |
| Biopsy (lymph node, mass, other)                                                                               | 8      |      |
| Tubal ligation/vasectomy                                                                                       | 9      |      |
| Cataract surgery                                                                                               | 4      |      |

**Table 3. Availability of surgical (including obstetrics and trauma) interventions.**

Number of facilities at which the procedure is available. N=14

|                                  |    |
|----------------------------------|----|
| <b>Anaesthesia</b>               |    |
| Regional anaesthesia blocks      | 6  |
| Spinal anaesthesia               | 13 |
| Ketamine intravenous anaesthesia | 13 |
| General anaesthesia inhalational | 5  |

**Table 4. Availability of anaesthesia interventions** Number of facilities at which the procedure is available. N=14

#### v. Emergency equipment and supplies for resuscitation

Basic equipment access was also lacking. No facility had access to all pieces of basic and essential surgical equipment listed on the tool. Only 1 hospital (7%) always had adult resuscitator bag valves and masks available, and only 2 out 14 facilities (14%) reported the same for pediatric bag valves and masks. 64% of facilities had access to oxygen only sometimes or never, and less than 30% had oropharyngeal airways available always for both adults and children. 39% of institutions were without an examination table.

Basic tools such as suction catheters, IV cannulas, and Foley catheters were only consistently available in less than 30% of all facilities.

57 % of facilities did not have sterile gloves consistently available, and 64% reported the same for examination gloves. Only 64% of the reporting institutions had a sterilizer available all the time. 71% could not make face masks available, and 86% were without consistent availability of eye protection. Availability of soap and wash basins was reported in less than two thirds of the 14 facilities.

The availability of emergency equipment and supplies for resuscitation was assessed in each of the health facilities (depicted in tables 5,6, and7).

| Capital Outlays                                  | Always | Sometimes | Never |
|--------------------------------------------------|--------|-----------|-------|
| Resuscitator bag valve & mask                    |        |           |       |
| Adult                                            | 1      | 7         | 6     |
| Paediatric                                       | 2      | 5         | 7     |
| Oxygen                                           | 5      | 4         | 5     |
| Stethoscope                                      | 9      | 3         | 0     |
| Batteries for flash light                        | 8      | 2         | 4     |
| Suction pump                                     | 11     | 3         | 0     |
| Blood pressure monitoring equipment              | 10     | 3         | 1     |
| Thermometer                                      | 10     | 3         | 1     |
| Scalpel Handle with blade                        | 9      | 4         | 1     |
| Retractor                                        | 7      | 6         | 0     |
| Scissors straight 12cm                           | 8      | 5         | 1     |
| Scissors blunt 14cm                              | 7      | 6         | 0     |
| Oropharyngeal airway                             | 4      | 6         | 4     |
| Adult                                            |        |           |       |
| Paediatric                                       | 4      | 5         | 5     |
| Forceps Kocher no teeth                          | 5      | 7         | 1     |
| Forceps, artery                                  | 8      | 6         | 0     |
| Kidney dishes stainless steel                    | 6      | 6         | 1     |
| Capped bottle, alcohol based solutions           | 2      | 5         | 3     |
| Gloves (sterile)                                 | 6      | 7         | 1     |
| Gloves (examination)                             | 5      | 8         | 1     |
| Needle holder                                    | 9      | 5         | 0     |
| Sterilizer                                       | 9      | 5         | 0     |
| Nail brush, scrubbing surgeon's                  | 7      | 5         | 1     |
| Vaginal speculum                                 | 9      | 2         | 3     |
| Bucket, plastic                                  | 4      | 4         | 4     |
| Drum for sterile compresses, bandages, dressings | 8      | 4         | 1     |
| Examination table                                | 8      | 4         | 1     |

**Table 5. Availability of Capital Outlays for Resuscitation**

Number of facilities where element is always, sometimes, or never available. N=14

| <b>Renewable</b>                                       |   |    |   |
|--------------------------------------------------------|---|----|---|
| Suction catheter sizes 16 FG                           | 2 | 5  | 6 |
| Tongue depressor wooden disposable                     | 3 | 7  | 3 |
| Nasogastric tubes 10 to 16 FG                          | 2 | 10 | 2 |
| Light source (lamp & flash light)                      | 4 | 9  | 1 |
| Intravenous fluid infusion set                         | 3 | 9  | 2 |
| IV cannulas                                            | 4 | 8  | 2 |
| Scalp vein infusion set                                | 3 | 7  | 3 |
| Syringes 2ml                                           | 4 | 9  | 1 |
| Syringes 10 ml                                         | 4 | 10 | 0 |
| Disposable needles                                     | 5 | 8  | 1 |
| Sharps disposal container                              | 5 | 8  | 1 |
| Tourniquet                                             | 4 | 8  | 1 |
| Sterile gauze dressing                                 | 3 | 8  | 2 |
| Bandages sterile                                       | 3 | 7  | 3 |
| Adhesive tape                                          | 3 | 9  | 1 |
| Needles, cutting & round bodied (for suturing)         | 4 | 8  | 2 |
| Suture synthetic absorbable                            | 4 | 6  | 3 |
| Splints for arm, leg                                   | 2 | 8  | 4 |
| Towel cloth                                            | 2 | 8  | 3 |
| Absorbent cotton wool                                  | 2 | 10 | 1 |
| Urinary catheter Foleys disposable #12, 14,18 with bag | 3 | 7  | 3 |
| Sheeting, plastic for examination table                | 4 | 7  | 3 |
| Waste disposal container                               | 4 | 8  | 2 |
| Face masks                                             | 4 | 8  | 2 |
| Eye protection                                         | 2 | 5  | 7 |
| Apron, plastic reusable                                | 3 | 9  | 2 |
| Soap                                                   | 5 | 9  | 0 |
| Wash basin                                             | 4 | 8  | 1 |

**Table 6. Availability of Renewable Supplies for Resuscitation**

Number of facilities where element is always, sometimes, or never available. N=14

| <b>Supplementary equipment</b>  |   |   |    |
|---------------------------------|---|---|----|
| Magills forceps<br>Adult        | 3 | 2 | 9  |
| Paediatric                      | 1 | 2 | 10 |
| Endotracheal tubes              | 1 | 2 | 10 |
| IV infusor bags                 | 1 | 2 | 10 |
| Chest tubes insertion equipment | 1 | 3 | 9  |
| Laryngoscope<br>Adult           | 3 | 3 | 7  |
| Paediatric                      | 1 | 3 | 9  |

|                       |   |   |    |
|-----------------------|---|---|----|
| Cricothyroidotomy set | 1 | 1 | 11 |
|-----------------------|---|---|----|

**Table 7. Availability of Supplementary Equipment for Resuscitation**

Number of facilities where element is always, sometimes, or never available. N=14

## LIMITATIONS

There are a several limitations to this survey. First, it provides only a brief overview of the capacity for surgical care and cannot be used for detailed programme planning. Second, it does not capture data from every first-referral health facility of the country; however, a majority of the first-referral health facilities identified by the MoH and WHO Somalia have responded, allowing us to provide a glimpse into the state of basic surgical capacity in the country. Third, some of the data was taken after the WHO IMEESC toolkit was implemented in the country, and results should be qualified by the possibility of interpretation constraints of the survey.

## DISCUSSION

Surgically treatable diseases are among the top 15 causes of disability,[16] and conservative estimates show that 11% of the world's Disability-Adjusted life years (DALYs) stem from surgically treated conditions.[1] In 2004, South East Asia and Africa accounted for 54% of the global burden,[17] and since then the burden of surgical disease is thought to be increasing.[16]

More than 2 billion people globally are without access to surgical care.[18] Of the 243 million surgical procedures performed globally each year, the 34.8% of the world's population living in low-income countries only have access to 8.1 million (only 3.5%) of such procedures.[2] As a result, rates of maternal mortality are high, minor surgical pathologies become lethal, and treatable trauma progresses to death.

Despite the great, unmet need and inclusion in policy-level dialogue on primary health care, the delivery of emergency surgical care has long been sidelined in global financing and policy debates, largely due to perceived complexity and cost. Further, despite the large and growing need for expanding access to surgical care, human resources, metrics and science focused on global surgery, and sustained financing mechanisms for surgical infrastructure lag behind other public health priorities (Smith-Rohrberg Maru, D, McGee, HM, Brady, JS et al. Global Surgical Care in 2030: Metrics and Strategies for Expansion in Access and Quality. 2013. [www.worldwewant2015.org/file/298623/download/323967](http://www.worldwewant2015.org/file/298623/download/323967))

Enormous shortfalls in infrastructure, supplies, and procedures undertaken are common at district-level health facilities in LMICs.[19] Every \$1 spent strengthening local surgical capacity generates \$10 through improved health and increased productivity.[20] In 2008, the Copenhagen Consensus Center's research identified strengthening surgical capacity, particularly at the district hospital level, as a highly cost-efficient solution to global diseases. Notably, strengthening local surgical capacity is an approach that would both provide a high degree of financial protection to populations and address the most DALYs in a cost effective manner.[1] In fact, the benefit-cost-ratio for the expansion of surgical

1  
2  
3 capacity at district hospitals was found to be 10:1.[21] Further, due to the implementation  
4 of “vertical” programmes in public health (i.e. child health, maternal health, cancer, and  
5 trauma), in which most programmes contain some surgical component, strengthening  
6 surgical services may improve health system overall.[22]  
7  
8

9  
10 This study provides an overview of the capacity for surgical care representing health  
11 facilities from in all 3 administrative zones, including 10 regions of 18 in Somalia, and  
12 demonstrates the significant gaps in infrastructure, life-saving and disability-preventive  
13 surgical interventions and essential equipment. Of the 14 reporting health facilities, 12  
14 identified as full hospitals, serving an average patient population of over 300,000 people,  
15 further indicating the need for surgical care system strengthening.  
16

17  
18 Of the 35 basic surgical and anaesthesia interventions, most hospitals were unable to  
19 provide all of the basic surgical services. Major essential procedures such as Caesarean  
20 section, appendectomy, elective hernia repair, laparotomy, and hydrocele were offered at  
21 a majority of hospitals, but these conflicted directly with the continuous availability of  
22 basic and necessary supplies and infrastructures. Only 3 facilities had any consistent  
23 access to oxygen cylinders, and even less reported access to tubing, valves, and masks.  
24

25  
26 Necessary procedures including resuscitation and airway management were offered at a  
27 majority (79%) of facilities. Those reporting the inability to provide resuscitation  
28 procedures, however, all reported the provision of major surgical procedures that would  
29 require provision and knowledge of those same procedures. The facilities in questions  
30 could not be contacted for confirmation.  
31

32  
33 Still, many facilities lacked access to key equipment and supplies such as provisional  
34 oxygen equipment, oropharyngeal airways, and IV cannulas. Only 2 facilities reported  
35 access to a functional anaesthesia machines, and few facilities noted the ability to provide  
36 general anaesthesia inhalation. Both oxygen and anaesthesia are essential medicines,  
37 (WHO Model List of Essential Medicines. World Health Organizations. 2013.  
38 [http://www.who.int/medicines/publications/essentialmedicines/18th\\_EML\\_Final\\_web\\_8J](http://www.who.int/medicines/publications/essentialmedicines/18th_EML_Final_web_8Jul13.pdf)  
39 [ul13.pdf](http://www.who.int/medicines/publications/essentialmedicines/18th_EML_Final_web_8Jul13.pdf)) and the existing deficit limits the availability safe and effective life-saving  
40 surgeries in Somalia or can result in significant complication or unnecessary patient  
41 suffering when these medicines are not provided.[23]  
42

43  
44 A surprising low amount of facilities reported having access to equipment necessary for  
45 the prevention of HIV transmission and other infection control. Less than half of the  
46 facilities reported access to sterile gloves, waste disposal containers, face masks, eye  
47 masks, aprons, and even soap and only slight more than half of the facilities had access to  
48 a sterilizer, all key components in the reduction of HIV transmission (WHO Prevention  
49 of Transmission of HIV. 2007.  
50 <http://www.who.int/surgery/publications/HIVprevention.pdf>)  
51

52

53  
54 A majority of the facilities lacked any formal guidelines for the management of  
55 emergency care, surgery, pain relief, or anaesthesia, providing a significant barrier to the  
56 strengthening of emergency and surgical care services and severely limiting their ability  
57 to respond to large scale disaster and crisis situations.  
58  
59  
60



1  
2  
3  
4  
5 The severe gaps in infrastructure and capital entail obstacles for the delivery of basic  
6 primary care in these facilities as well. Absence of key infrastructural elements such as  
7 water, electricity, and oxygen, as well as the lack of consistent renewable sterilization  
8 tools and supplies involved in infection prevention (bandages, alcohol, gloves, aprons,  
9 soap, etc.) is common among the facilities depicted. Establishing management guidelines  
10 for surgical infrastructure and targeted development in improving access to these lacking  
11 areas would not only increase the quality of surgical services but also that of basic  
12 primary care services offered by these facilities.  
13  
14  
15

16  
17 Strengthening of surgical systems will not only reduce the disease burden of surgically  
18 related issues but can also increase progress toward achieving the 2015 Millennium  
19 Development Goals (MDGs). Strengthening surgical care delivery can help achieve  
20 MDGs 1 (eradication of poverty), [18] 4 (child health), 5 (maternal health), and 6  
21 (HIV/AIDS prevention). [21] Investments in oxygen and related equipment and basic  
22 infrastructural needs, such as electricity and running water, will also serve to benefit  
23 patients suffering from a range of conditions.  
24  
25  
26

27  
28 To meet the needs of LMICs, the WHO Emergency and Essential Surgical Care (EESC)  
29 program with its partners worldwide developed the *Integrated Management for*  
30 *Emergency and Essential Surgical Care (IMEESC)* toolkit (WHO IMEESC Toolkit:  
31 <http://www.who.int/surgery/en>). It guides policies, research for evidence-based planning  
32 (WHO EESC Situation Analysis Tool to assess emergency, trauma, obstetrics, anesthesia  
33 and surgical services, WHO EESC Global Database), trainings, best practice protocols at  
34 point-of-care, monitoring and evaluation of the progress of surgical care systems. The  
35 IMEESC toolkit provides guidance for policymakers, managers, and providers at various  
36 levels of care, instructional videos, training modules on Emergency & Trauma Care for  
37 frontline health workers, disaster-management resources, and monitoring and evaluation.  
38  
39  
40  
41

42  
43 This study provides insight into the surgical capacity of Somalia, using the WHO Tool  
44 for Situational Analysis to Assess Emergency and Essential Surgical Care. Addressing  
45 the gaps identified by this study and the strengthening of surgical services are needed to  
46 strengthen health systems holistically in Somalia. [24] Further research is needed to  
47 determine the burden of surgical disease in Somalia and to determine the cost-benefit of  
48 specific interventions to improve surgical services.  
49  
50  
51  
52  
53  
54  
55  
56  
57  
58  
59  
60

1  
2  
3  
4  
5  
6  
7  
8  
9  
10  
11  
12  
13  
14  
15  
16  
17  
18  
19  
20  
21  
22  
23  
24  
25  
26  
27  
28  
29  
30  
31  
32  
33  
34  
35  
36  
37  
38  
39  
40  
41  
42  
43  
44  
45  
46  
47  
48  
49  
50  
51  
52  
53  
54  
55  
56  
57  
58  
59  
60

**Disclaimer:** The authors include staff members of WHO. They are responsible for the views expressed in this publication and do not necessarily represent the decisions or stated policy of WHO.

**Acknowledgements:** The following members of GIEESC in Somalia were instrumental in obtaining the reported data: Yassin Arab Abdi, Dr. Nima Abdi Hassan, Mohamed Samy Salama, Dr. Mahmoud Mostafa El-Antably, Dr. Soleh Abdullah Omar, Jamal Mohamed Jama, Abdulkadir Mohamud Giama, Nura Mohamed Ahmed, Saeed Hussien Legeh, Risaaq Mohamoud Yousuf, Cabdi Qaadu Bikri, Ahmed Jama, Dr. Muse Geele, Noor M. Noor.

**Contributors:** NE analyzed and interpreted the data, drafted the article, revised it and finally approved the submitted version. AS analyzed and interpreted the data, drafted the article, revised it and finally approved the submitted version. MC contributed to conception and design, acquisition and interpretation of data, helped draft the article, made critical revisions and finally approved the submitted version. OS contributed to acquisition of data, made critical revisions and finally approved the submitted version. ME contributed to acquisition of data, made critical revisions and finally approved the submitted version. GP contributed to acquisition of data, made critical revisions and finally approved the submitted version. AI contributed to acquisition of data, made critical revisions and finally approved the submitted version.

**Funding Statement:** This research received no specific grant from any funding agency in the public, commercial or not-for-profit sectors.

**Competing interests:** None.

**Data sharing statement:** No additional data are available, all has been included.

## REFERENCES

1. Debas HT, Gosselin R, McCord C, et al. Surgery. In: Jamison D, ed. Disease Control Priorities in Developing Countries. 2<sup>nd</sup> edn. New York: Oxford University Press, 2006:1245-59.
2. Weiser TG, Regenbogen SE, Thompson KD, et al. An estimation of the global volume of surgery: a modelling strategy based on available data. *Lancet* 2008;**372**:139-44.
3. World Health Organisation. Regional Office for the Eastern Mediterranean, Cairo. Country Cooperation Strategy for WHO and Somalia 2010-2014. 2010.
4. UNICEF. The private sector and health: a survey of Somaliland private pharmacies. 2008.
5. UNDP. Population projections. 2007.
6. UNDP. Millennium Development Goals Report for Somalia. 2007
7. Penoyar T, Cohen H, Kibatala P, et al. Emergency and surgery services of primary hospitals in United Republic of Tanzania. *BMJ Open* 2012; **2**(1): e000369
8. Natuzzi ES, Kushner A, Jagilly R, et al. Surgical Care in the Solomon Islands: a road map for universal surgical care delivery. *World J Surg* 2011; **35**(6):1183-93.
9. Idriss A, Shivute N, Bickler S, et al. Emergency, anaesthetic and essential surgical capacity in the Gambia. *Bull World Health Organ*. Epub 2011 May.
10. Sherman L, Clement P, Cherian M, et al. Implementing Liberia's Poverty Reduction Strategy: An Assessment of Emergency and Essential Surgical Care. *Arch Surg* 2011;**146**: 35 - 39.
11. Choo S, Perry H, Hesse AA, et al. Assessment of capacity for surgery, obstetrics and anaesthesia in 17 hospitals in Ghana using a WHO assessment tool. *Trop Med Int Health* 2010 September.
12. Contini S, Taqdeer A, Cherian M, et al. Emergency and Essential Surgical Services in Afghanistan: Still a Missing Challenge. *World J Surg* 2010 January.
13. Taira BR, Cherian MN, Yakandawala H, et al. Survey of Emergency and Surgical Capacity in the Conflict-Affected Regions of Sri Lanka. *World J Surg* 2009 October.

14. Kingham TP, Kamara TB, Cherian MN, et al. Quantifying Surgical Capacity in Sierra Leone: A Guide for Improving Surgical Care. *Arch Surg* 2009;**144**(2):122-127.
15. Cherian MN, Noel L, Buyanjargal Y, et al. Essential emergency and surgical procedures in resource-limited facilities: a WHO workshop in Mongolia. *World Hosp Health Serv* 2004;**40**(4):24-29.
16. Farmer P, Kim J. "Surgery and global health: a view from beyond the OR." *World J Surg* 2008; **32**(4):533-536.
17. Johnson, WD. Surgery as a Global Health Issue. *Surg Neurol Int*. First: 03 April 2013. doi:10.4103/2152-7806.110030
18. Funk, LM, Weiser, TG, Berry, WR, et al. "Global Operating Theatre Distribution and Pulse Oximetry Supply: an Estimation from Reported Data." *Lancet*. 2010;**376**(9746): 1055-1061.
19. Kushner AI, Cherian MN, Shokohmand, AS, et al. Addressing the Millennium Development Goals from a surgical perspective: essential surgery and anesthesia in 8 low- and middle-income countries. *Arch Surg* 2010;**145**(2): 154-159.
20. United Nations. A New Global Partnership: Eradicate Poverty And Transform Economies Through Sustainable Development: The Report of the High-Level Panel of Eminent Persons on the Post-2015 Development Agenda. United Nations Publication 2013.
21. Jamison, D, Jha, P, Bloom, D. Diseases – disease control. In: Lomborg, B. *Global Crises, Global Solutions: 2<sup>nd</sup> ed.* New York: Cambridge University Press. 2009:129-163.
22. Ozgediz, D, Jamison, D, McQueen, K. The burden of surgical conditions and access to surgical care in low- and middle-income countries. *Bull World Health Organ* 2008;**86**(8):646-647
23. Cherian, MN, Merry, AF, Wilson, IH. The World Health Organization and Anaesthesia. *Anaesthesia*, 2007;**62**:65-66
24. Hedges JP, Mock CN, Cherian MN. The Political Economy of emergency and essential surgery in global health. *World J Surg* 2010;**34**:2003–2006. [PubMed: 20454792]

## **A Survey of Essential Surgical Capacity in Somalia**

### **Corresponding Author:**

Akshay Sharma  
254 Cabot Mail Center  
Cambridge, MA USA  
Phone: 001-949-735-4736  
Email: akshay1227@gmail.com

### **Co-Authors:**

Dr. Natalie Elkheir<sup>1</sup>; Akshay Sharma<sup>2</sup>; Dr. Meena Cherian<sup>3</sup>; Dr. Omar Abdelrahman Saleh<sup>4</sup>; Dr. Marthe Everard<sup>5</sup>; Dr. Ghulam Rabani Popal<sup>6</sup>; Dr Abdi Awad Ibrahim<sup>7</sup>

<sup>1</sup>St. George's Hospital, London, United Kingdom

<sup>2</sup>Harvard College, Harvard University, Cambridge, Massachusetts, USA

<sup>3</sup>Emergency & Essential Surgical Care Programme, Health Systems and Innovation, World Health Organization - HQ, Geneva, Switzerland

<sup>4</sup>EHA Coordinator, World Health Organization Somalia, Nairobi, Kenya

<sup>5</sup>World Health Organization Somalia, Nairobi, Kenya

<sup>6</sup>WHO Representative Somalia, World Health Organization Somalia, Nairobi, Kenya

<sup>7</sup>Resident Advisor to the Minister of Health Somalia, Ministry of Health Somalia, Mogadishu, Somalia

**Keywords:** Surgery, Somalia, Emergency, Anaesthesia, Trauma

**Word count:** 2,679

## ABSTRACT

**Objective:** ~~The objective of this study was to~~ assess life-saving and disability-preventing surgical ~~including emergency, trauma, obstetrics, anaesthesia~~ services ~~(including emergency, trauma, obstetrics, anaesthesia)~~ of health facilities in Somalia and to assist in ~~the~~ planning of strategies for strengthening surgical care systems.

**Design:** Cross-sectional survey

**Setting:** Health facilities in all 3 administrative zones of Somalia: northwest Somalia (NWS), known as Somaliland; northeast Somalia (NES), known as Puntland; and south/central Somalia (SCS).

**Participants:** 14 health facilities

**Measures:** The WHO Tool for Situational Analysis to Assess Emergency and Essential Surgical Care was employed to capture a health facility's capacity to deliver ~~surgical (including obstetrics and trauma)~~ and anaesthesia services by investigating four categories of data: infrastructure; human resources; interventions available; and equipment.

**Results:** The 14 facilities surveyed in Somalia represented 10 of 18 districts throughout the country. The facilities served an average patient population of 331,250 people, and 12 of 14 identified as hospitals. While major surgical procedures were provided at many facilities (Caesarean Section, Laparotomy, Appendectomy, etc.), only 22% had fully available oxygen access, 50% fully available electricity, and less than 30% had any management guidelines for emergency and surgical care. Further, only 36% were able to provide general anaesthesia inhalation due to lack of skills, supplies, and equipment. Basic supplies for airway management and ~~the~~ prevention of infection ~~and HIV~~ transmission were severely lacking in most facilities.

**Conclusions:** According to the results of the WHO Tool for Situational Analysis to Assess Emergency and Essential Surgical Care survey, there exist significant gaps in the capacity of emergency and essential surgical services in Somalia including inadequacies in essential equipment, ~~services~~, and infrastructure. The information provided by this tool can serve as a basis for evidenced-based decisions on country-level policy regarding the allocation of resources and provision of emergency and essential surgical services.

## ARTICLE SUMMARY

### Article Focus

- On-site visits to primary health centres in a developing nation
- Evaluate capacity to deliver emergency and essential surgical care

### Strengths and limitations of this study

- Provides insight into the surgical capacity of Somalia
- Identifies significant gaps and areas for improvement towards evidence-based planning to improve surgical infrastructure, skills training, and equipment and supplies
- Does not capture data from every first-referral health facilities of the country.
- Measures are subjective and in some cases estimates

Formatted: Font: Not Bold

Formatted: Pattern: Clear

Formatted: Bullets and Numbering

## INTRODUCTION

Conditions that can be treated with surgery account for an estimated 11% of the world's disability-adjusted life years.[1] Despite recent data estimating the global volume of surgery at 234 million surgical procedures annually and significant disparities between procedures performed in high- and low- income countries, global public health initiatives have traditionally neglected the necessity for the provision of surgical services.[2] Poor access to surgical services, particularly at rural facilities, results in excess morbidity and mortality from a broad range of treatable surgical conditions including injuries, complications of pregnancy, sequelae of infectious diseases, acute abdominal conditions and congenital anomalies. Improving the access to surgical services in low-income countries requires addressing gaps in infrastructure, trained/skilled personnel, appropriate equipment and medications.

## BACKGROUND

Somalia's 21 years of war, armed conflict and insecurity have had a devastating effect on the health sector. The current situation is at its worst level since the beginning of the civil war in 1991, with unprecedented levels of child malnutrition, internal displacement, as well as conflict and insecurity rife in some parts of the country.[3] Continuing conflict has left 90% of health infrastructure looted, damaged or destroyed.[4] The low health workforce ratios before the war have depreciated through high levels of healthcare worker emigration, leaving an estimated 3 physicians per 100000 population (total 253 physicians), 11 nurses per 100 000 population (861 nurses) and 2 midwives per 100 000 population (116 midwives) serving the whole country.[5]

Rates of death and disability from treatable surgical conditions continue to be unacceptably high. Somalia's maternal mortality rate is estimated to be 1044 per 100 000 live births, one of the highest in the region.[6] This corresponds to a lifetime risk of one maternal death for every 10 women. The leading causes of maternal death (ante-partum and postpartum haemorrhage, obstructed labour and eclampsia) can all be addressed with appropriate emergency obstetric care, which often require surgical and/or anaesthesia interventions. Trauma-related mortality, through road traffic accidents, armed fighting and landmine explosions is also common. In 2010 and 2011, WHO reported more than 7500 war-wounded civilians who were admitted to three main hospitals in Mogadishu, one in five being children and one in three women (World Health Organization. Emergency and Essential Surgical Care. 2013. [www.who.int/surgery/en/](http://www.who.int/surgery/en/))

The health sector faces overwhelming challenges in a country where two decades of lawlessness have resulted in the collapse of central government and 3 almost autonomously-ruled zones: northwest Somalia (NWS), known as Somaliland; northeast Somalia (NES), known as Puntland; and south/central Somalia (SCS). Somalia's public

1  
2  
3  
4  
5  
6  
7  
8 health system is tiered, comprising regional referral hospitals, district hospitals, maternal  
9 and child health centres and health posts. However, hospitals and health facilities are  
10 limited in number, inadequately distributed, operate using vastly different standards, and  
11 often cannot provide a minimum package of primary health care (PHC) services. As  
12 funders and public health experts adopt the expansion of primary healthcare services, the  
13 inclusion of surgical services at the first-referral level is critical. The purpose of this  
14 survey was to collect knowledge gained from comprehensive quantitative assessments of  
15 surgical capacity in Somalia in order to assist in planning strategies for universal access  
16 to life-saving and disability-preventing surgical services (World Health Organization.  
17 Emergency and Essential Surgical Care. 2013. [www.who.int/surgery/en/](http://www.who.int/surgery/en/)).

18 Similar studies using the WHO Situational Analysis tool have been conducted in  
19 Tanzania.[7] Solomon Islands.[8] Gambia.[9] Liberia.[10] Ghana.[11] Afghanistan.[12]  
20 Sri Lanka.[13] Sierra Leone.[14] and Mongolia.[15]

## 21 22 23 **OBJECTIVE**

24 To assess life-saving and disability-preventing surgical services (including emergency,  
25 trauma, obstetrics, anaesthesia) of health facilities in Somalia and to assist in the planning  
26 of strategies for strengthening surgical care systems.

27  
28 To assess the current capacity for essential anesthesia and surgical services in Somalia  
29 with the purpose of providing a benchmark for critical areas needing improvement.  
30

## 31 32 **METHODS**

33 The WHO Tool for Situational Analysis to Assess Emergency and Essential Surgical  
34 Care was employed to capture a health facility's capacity to perform basic surgical  
35 (including obstetrics and trauma) and anaesthesia interventions by investigating four  
36 categories of data: infrastructure, human resources, interventions provided and equipment  
37 availability. The tool queries the availability of 8 types of care providers, 35 surgical  
38 interventions and 67 items of equipment. [7]

39 The WHO Tool for Situational Analysis to Assess Emergency and Essential Surgical  
40 Care was distributed by the Ministry of Health and WHO Somalia to 20 first-referral-  
41 level-health facilities around the country and was completed at 14 health facilities  
42 representing 10 of the 18 regions of Somalia and all 3 administrative zones. The survey  
43 was extended to regional medical officers and facility administrators. Participation in the  
44 survey and reporting to the WHO was voluntary The physical surveys were then data  
45 were obtained during either by post directly to the WHO Somalia office (Nairobi, Kenya)  
46 or by site visits from the Somalia Ministry of Health (MoH), the WHO country office and  
47 members of the Global Initiative for Emergency and Essential Surgical Care (GIEESC)  
48 between September 2011 and April 2012, many of whom were in attendance of the WHO  
49 Meeting on Strengthening Surgical and Obstetrics Care in Somalia in April 2012  
50 ([http://www.who.int/surgery/globalinitiative/gieesc\\_country\\_reports/en/index.html](http://www.who.int/surgery/globalinitiative/gieesc_country_reports/en/index.html)). At  
51 this meeting reporting protocol and initial survey data were discussed. Participation in the  
52 survey and reporting to the WHO was voluntary.



The answer of available was defined as “fully available for all patients all of the time,” while sometimes was defined as “available with frequent shortages or difficulties”.(WHO EESC Situational Analysis Tool. 2012. [http://www.who.int/surgery/publications/WHO\\_EESC\\_SituationAnalysisTool.pdf](http://www.who.int/surgery/publications/WHO_EESC_SituationAnalysisTool.pdf))

Despite efforts to standardize the reporting and the collection of much of the data by site-visits performed by agents affiliated to the authors, it must be noted that an inherent reporting bias may be present in the data, given that survey data was compiled by different agents at each site. Further, in a limited number of cases, facilities did not respond to individual questions. Blank answers were considered as neither a positive or negative answer, but simply deemed as unreported.

Data on various indices were entered into and analyzed from WHO Global DataCol Database for Emergency and Essential Surgical Care.

Facilities were asked the size of the ‘population served’, intending to quantify the population living in the catchment area. This value represents the number of residents who might use the facility as their first-referral health facility, not the number of patients seen.

## RESULTS

- i Health facility characteristics
- ii Infrastructure
- iii Human resources
- iv Interventions
- v Equipment

Data were gathered from 14 ~~of 20~~ health facilities in 10 regions (out of 18) across Somalia, as featured figure 1 and table 1.

| Type of Facility (Self-identified) | Name of Facility        | Region          | Number of Beds | Operating Theaters |
|------------------------------------|-------------------------|-----------------|----------------|--------------------|
| General Hospital                   | Garowe Hospital         | Nugaal          | 51-80          | 11-20              |
|                                    | Gardo General Hospital  | Bari            | 21-50          | 1                  |
|                                    | Hergeisa Group Hospital | Woqooyi Galbeed | 301-400        | 5-10               |
|                                    | Borama General Hospital | Awdal           | 201-300        | 1                  |
|                                    | Burao Regional          | Togdeer         | 201-300        | 1                  |

Formatted Table

|                                     |                             |                 |                |             |
|-------------------------------------|-----------------------------|-----------------|----------------|-------------|
| <b>Provincial Hospital</b>          | Hospital                    |                 |                |             |
|                                     | Berbera Referral Hospital   | Woqooyi Galbeed | <u>101-200</u> | <u>2</u>    |
|                                     | Erigavo Regional Hospital   | Sanaag          | <u>81-100</u>  | <u>1</u>    |
|                                     | Sool Regional Hospital      | Sool            | <u>81-100</u>  | <u>1</u>    |
| <b>Health Center</b>                | Doolow Health Center        | Gedo            | <u>5-10</u>    | <u>1</u>    |
| <b>Private/NGO/Mission Hospital</b> | Galkayo Medical Center      | Mudug           | <u>51-80</u>   | <u>3-4</u>  |
|                                     | Galkayo Specialist Hospital | Mudug           | <u>3-4</u>     | <u>1</u>    |
|                                     | Medina Hospital             | Banadir         | <u>201-300</u> | <u>5-10</u> |
|                                     | Maani Hospital              | Banadir         | <u>21-50</u>   | <u>1</u>    |
|                                     | Manhal Specialty Hospital   | Woqooyi Galbeed | <u>51-80</u>   | <u>5-10</u> |

**Table 1.** ~~Participating-Responding~~ health facilities. N=14

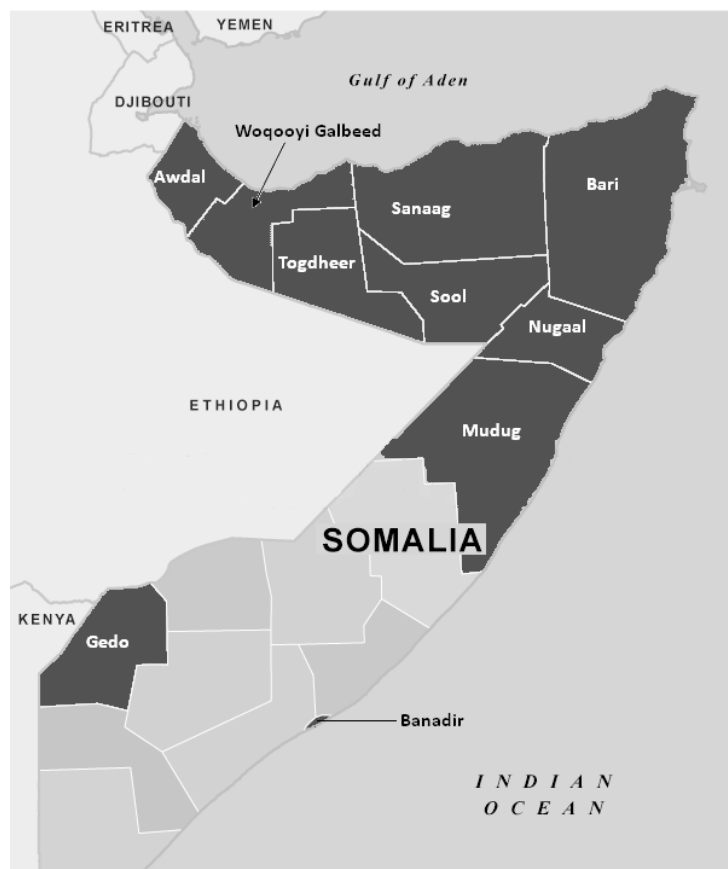

Figure 1. Participating regions of Somalia.

### **i. Health facility characteristics**

Of the 14 facilities that responded to the survey 5 were provincial hospitals, 5 were private/mission/NGO hospitals, 3 were general hospitals and 1 was a health center. Each facility reported having at least 1 operating theatre, with a maximum of between 11 and 20 operating theatres. The populations served by each facility ranged from 100,000 to 1,000,000 people, with the average of the reporting facilities being 331,250 people.

### **ii. Infrastructure**

The emergency and surgical infrastructure of the 14 reporting facilities were largely inadequate, with only 22% of health facilities having oxygen cylinder supplies consistently available. 28% of facilities never or only sometimes had access to running water available and only 50% had a consistently available electricity source. Only 50% of

the facilities had fully available access to both running water and electricity. Access to a functional anaesthesia machine was only present in 2 (15%) ~~of the 14~~ facilities, one of those facilities being a local health center. Only 3 facilities ~~had reported~~ access to a functioning pulse-oximeter.

50% of facilities had areas designated always for emergency care and only 38% of facilities had the same for postoperative care.

A minority of facilities had formal management guidelines for emergency care (3/14 = 21%), surgery (5/14 = 36%), anaesthesia (4/14 = 29%), or pain relief (1/14 = 7%).

Table 2 depicts the key infrastructural elements available in the health facilities accessed.

|                                                           | Always          | Sometimes      | Not Available   |
|-----------------------------------------------------------|-----------------|----------------|-----------------|
| Oxygen cylinder                                           | <del>322</del>  | <del>17</del>  | <del>7110</del> |
| Running water                                             | <del>1072</del> | <del>214</del> | <del>142</del>  |
| Electricity source                                        | <del>507</del>  | <del>365</del> | <del>142</del>  |
| Operational power generator                               | <del>502</del>  | <del>362</del> | <del>149</del>  |
| Blood bank                                                | <del>5</del>    | <del>3</del>   | <del>6</del>    |
| Hemoglobin & urine testing                                | <del>12</del>   | <del>2</del>   | <del>0</del>    |
| X-ray machine                                             | <del>8</del>    | <del>4</del>   | <del>2</del>    |
| Medical records                                           | <del>10</del>   | <del>3</del>   | <del>1</del>    |
| <del>Pulse Oximeter Functioning anaesthesia machine</del> | <del>315</del>  | <del>015</del> | <del>870</del>  |
| <del>Medical records</del>                                | <del>71</del>   | <del>21</del>  | <del>7</del>    |
| <del>Area designated for emergency care</del>             | <del>505</del>  | <del>141</del> | <del>367</del>  |
| <del>Area designated for postoperative care</del>         | <del>385</del>  | <del>81</del>  | <del>547</del>  |
| <del>Management Guidelines for Emergency Care</del>       | <del>213</del>  | <del>71</del>  | <del>7210</del> |
| <del>Management Guidelines for Surgery</del>              | <del>365</del>  | <del>0</del>   | <del>649</del>  |
| <del>Management Guidelines for Anaesthesia</del>          | <del>29</del>   | <del>7</del>   | <del>64</del>   |
| <del>Management Guidelines for Pain relief</del>          | <del>7</del>    | <del>21</del>  | <del>72</del>   |
| <del>Blood bank</del>                                     | <del>36</del>   | <del>21</del>  | <del>43</del>   |
| <del>Management Guidelines for Anaesthesia</del>          | <del>4</del>    | <del>1</del>   | <del>9</del>    |
| <del>Haemoglobin &amp; urine testing</del>                | <del>86</del>   | <del>14</del>  | <del>0</del>    |
| <del>Management Guidelines for Pain relief</del>          | <del>1</del>    | <del>3</del>   | <del>10</del>   |
| <del>X-ray machine</del>                                  | <del>57</del>   | <del>29</del>  | <del>14</del>   |

- Formatted: Font: Bold
- Formatted: Not Highlight
- Formatted: Not Highlight
- Formatted: Not Highlight
- Formatted: Font: Bold
- Formatted: Not Highlight
- Formatted: Not Highlight
- Formatted: Font: Bold
- Formatted: Font: Bold
- Formatted: Font: Bold
- Formatted: Font: Bold, Not Highlight
- Formatted: Not Highlight
- Formatted: Font: Bold
- Formatted: Font: Bold, Not Highlight
- Formatted: Not Highlight
- Formatted: Font: Bold

|                                        |          |          |          |
|----------------------------------------|----------|----------|----------|
| <b>Functioning anaesthesia machine</b> | <u>7</u> | <u>5</u> | <u>2</u> |
|----------------------------------------|----------|----------|----------|

Formatted: Font: Bold

**Table 2. Availability of infrastructure and health resources in Somalia, 2012**

Number% of facilities where element is always, sometimes, or never available. Bolded items designate those which are specific to quality surgical care delivery. N=14

### iii. Human Resources

More data is needed to comment on the Health Human Resources in Somalia. In this section, blank answers to staffing questions impeded our ability to comment on the state of the work force completely. We did however summarize the results to survey questions of which all or a majority of facilities supplied data.

More data is needed to comment on the Health Human Resources in Somalia. The 14 facilities together reported a total of 137 healthcare providers. Only 15 (10.9%) individuals were identified as full time trained surgical specialists, located only at 9 out of 14 of the facilities. 14 (10.9%) were identified as obstetricians, and only 4 (2.9%) individuals were identified as qualified anesthesiologists and were located in only 3 of the 14 facilities, with 27 (19.7%) unlicensed medical staff (Nurses, medical assistants, etc.) providing anesthetic services.

### iv. Interventions

Of the 35 ~~basic~~ interventions ~~listed in the tool~~, only abscess incision and drainage is offered at all 14 facilities. ~~Additionally, a~~ acute burn management, wound debridement, hydrocele treatment, and male circumcision are widely provided by the surveyed facilities being offered at 86%, 85%, 86%, 86%, of all facilities respectively. Caesarean section is offered at 93% of all facilities (n=14).

Provision of anaesthesia services was severely lacking, however, with only 36% of facilities able to perform general anaesthesia inhalational procedures. Of the 8 facilities that reported back why they could not provide this service, 1 (Doolow Health Center) attributed it to lack of skill ~~and~~, 4 (Borama General Hospital, Doolow Health Center, Erigavo Regional Hospital, Burao Regional Hospital) to lack of supplies/drugs, ~~and 2 to a lack of equipment.~~ 1 (Gardo General Hospital) facility attributed it both to lack of skill and lack of equipment.

The ability of each health facility to provide basic surgical and anaesthesia procedures was assessed (tables 3 ~~and~~ 4).

| General surgery & trauma                                                                                    | Available   |
|-------------------------------------------------------------------------------------------------------------|-------------|
| Resuscitation (airway, haemorrhage, peripheral percutaneous intravenous access, peripheral venous cut down) | <u>1179</u> |
| Cricothyroidotomy/ Tracheostomy                                                                             | <u>1071</u> |
| Chest tube insertion                                                                                        | <u>964</u>  |
| Removal of foreign body (throat/ear/eye/nose)                                                               | <u>1179</u> |

|                                                                                                                |                          |
|----------------------------------------------------------------------------------------------------------------|--------------------------|
| Acute burn management                                                                                          | <u>1286</u>              |
| Incision & drainage of abscess                                                                                 | <u>14100</u>             |
| Suturing (for wounds, episiotomy, cervical & vaginal lacerations)                                              | <u>13100</u>             |
| Wound debridement                                                                                              | <u>1185</u>              |
| Caesarean section                                                                                              | <u>1393</u>              |
| Dilatation & curettage (gynaecology/obstetrics)                                                                | <u>1292</u>              |
| Obstetric fistula repair                                                                                       | <u>750</u>               |
| Appendectomy                                                                                                   | <u>7911</u>              |
| Hernia repair (strangulated, elective)                                                                         | <u>7110</u>              |
| Hydrocele                                                                                                      | <u>8612</u>              |
| Cystostomy                                                                                                     | <u>649</u>               |
| Urethral stricture dilatation                                                                                  | <u>7911</u>              |
| Laparotomy (uterine rupture, ectopic pregnancy,, acute abdomen, intestinal obstruction, perforation, injuries) | <u>1286</u>              |
| Male circumcision                                                                                              | <u>8612</u>              |
| Congenital hernia repair                                                                                       | <u>699</u>               |
| Neonatal surgery (abdominal wall defect, colostomy imperforate anus, intussusceptions)                         | <u>395</u>               |
| Cleft lip repair                                                                                               | <u>7110</u>              |
| Clubfoot repair                                                                                                | <u>649</u>               |
| Contracture release/ skin grafting                                                                             | <u>7110</u>              |
| Fracture treatment                                                                                             | Closed   Open            |
|                                                                                                                | <u>7110</u>   <u>578</u> |
| Joint dislocation treatment                                                                                    | <u>649</u>               |
| Drainage of osteomyelitis/septic arthritis                                                                     | <u>649</u>               |
| Amputation                                                                                                     | <u>7911</u>              |
| Biopsy (lymph node, mass, other)                                                                               | <u>578</u>               |
| Tubal ligation/vasectomy                                                                                       | <u>649</u>               |
| Cataract surgery                                                                                               | <u>294</u>               |
| <b>Anaesthesia</b>                                                                                             |                          |
| <u>Regional anaesthesia blocks</u>                                                                             | <u>43</u>                |
| <u>Spinal anaesthesia</u>                                                                                      | <u>93</u>                |
| <u>Ketamine intravenous anaesthesia</u>                                                                        | <u>93</u>                |
| <u>General anaesthesia inhalational</u>                                                                        | <u>36</u>                |

**Table 3. Availability of surgical (including obstetrics and trauma) and anaesthesia interventions. %Number of facilities at which offer the procedure is available. N=14**

|                                         |           |
|-----------------------------------------|-----------|
| <b>Anaesthesia</b>                      |           |
| <u>Regional anaesthesia blocks</u>      | <u>6</u>  |
| <u>Spinal anaesthesia</u>               | <u>13</u> |
| <u>Ketamine intravenous anaesthesia</u> | <u>13</u> |
| <u>General anaesthesia inhalational</u> | <u>5</u>  |

**Table 4. Availability of anaesthesia interventions** Number of facilities at which the procedure is available. N=14

#### v. Emergency equipment and supplies for resuscitation

Formatted: Font: Bold

Basic equipment access was also lacking. No facility had access to all pieces of basic and essential surgical equipment listed on the tool. Only 1 hospital (7%) always had adult resuscitator bag valves and masks ~~always~~ available, and only 2 out of 14 facilities (14%) reported the same for paediatric bag valves and masks. 64% of facilities had access to oxygen only sometimes or never, and less than 30% had oropharyngeal airways available always for both adults and children. 39% of institutions were without an examination table.

Basic tools such as suction catheters, IV cannulas, and Foley catheters were only consistently available in less than 30% of all facilities.

57 % of facilities did not have sterile gloves consistently available, and 64% reported the same for examination gloves. Only 64% of the reporting institutions had a sterilizer available all the time. 71% could not make face masks available, and 86% were without consistent availability of eye protection. Availability of soap and wash basins was reported in less than two thirds of the 14 facilities.

The availability of emergency equipment and supplies for resuscitation was assessed in each of the health facilities (depicted in tables 5.4.6. and 7).

| Capital Outlays                        | Always | Sometimes | Never |
|----------------------------------------|--------|-----------|-------|
| Resuscitator bag valve & mask<br>Adult | 71     | 507       | 436   |
| Paediatric                             | 214    | 536       | 570   |
| Oxygen                                 | 536    | 284       | 365   |
| Stethoscope                            | 759    | 253       | 0     |
| Batteries for flash light              | 578    | 442       | 294   |
| Suction pump                           | 1179   | 213       | 0     |
| Blood pressure monitoring equipment    | 710    | 213       | 71    |
| Thermometer                            | 710    | 213       | 71    |
| Scalpel Handle with blade              | 649    | 294       | 71    |
| Retractor                              | 547    | 466       | 00    |
| Scissors straight 12cm                 | 578    | 365       | 71    |
| Scissors blunt 14cm                    | 547    | 466       | 0     |
| Oropharyngeal airway<br>Adult          | 294    | 426       | 294   |
| Paediatric                             | 284    | 365       | 365   |
| Forceps Kocher no teeth                | 385    | 547       | 81    |
| Forceps, artery                        | 578    | 436       | 00    |

Formatted: Tab stops: 0.51", Left

|                                                         |     |     |     |
|---------------------------------------------------------|-----|-----|-----|
| Kidney dishes stainless steel                           | 466 | 466 | 71  |
| Capped bottle, alcohol based solutions                  | 332 | 425 | 253 |
| Gloves (sterile)                                        | 436 | 507 | 71  |
| Gloves (examination)                                    | 365 | 578 | 71  |
| Needle holder                                           | 649 | 365 | 0   |
| Sterilizer                                              | 649 | 365 | 0   |
| Nail brush, scrubbing surgeon's                         | 547 | 385 | 81  |
| Vaginal speculum                                        | 649 | 442 | 223 |
| Bucket, plastic                                         | 334 | 334 | 334 |
| Drum for sterile compresses, bandages, dressings        | 648 | 344 | 81  |
| Examination table                                       | 648 | 344 | 81  |
| <b>Renewable</b>                                        |     |     |     |
| Suction catheter sizes 16 FG                            | 15  | 39  | 46  |
| Tongue depressor wooden disposable                      | 23  | 54  | 23  |
| Nasogastric tubes 10 to 16 FG                           | 14  | 72  | 14  |
| Light source (lamp & flash light)                       | 29  | 64  | 7   |
| Intravenous fluid infusion set                          | 21  | 65  | 14  |
| IV cannulas                                             | 29  | 57  | 14  |
| Scalp vein infusion set                                 | 23  | 54  | 23  |
| Syringes 2ml                                            | 29  | 64  | 7   |
| Syringes 10 ml                                          | 29  | 71  | 0   |
| Disposable needles                                      | 36  | 57  | 7   |
| Sharps disposal container                               | 36  | 57  | 7   |
| Tourniquet                                              | 31  | 62  | 7   |
| Sterile gauze dressing                                  | 23  | 52  | 15  |
| Bandages sterile                                        | 23  | 54  | 23  |
| Adhesive tape                                           | 23  | 69  | 8   |
| Needles, cutting & round bodied (for suturing)          | 29  | 57  | 14  |
| Suture synthetic absorbable                             | 31  | 46  | 23  |
| Splints for arm, leg                                    | 14  | 57  | 29  |
| Towel cloth                                             | 15  | 62  | 23  |
| Absorbent cotton wool                                   | 15  | 77  | 8   |
| Urinary catheter Foleys disposable #12, 14, 18 with bag | 23  | 54  | 23  |
| Sheeting, plastic for examination table                 | 29  | 50  | 21  |
| Waste disposal container                                | 29  | 57  | 14  |
| Face masks                                              | 29  | 57  | 14  |
| Eye protection                                          | 14  | 36  | 50  |
| Apron, plastic reusable                                 | 22  | 64  | 14  |
| Soap                                                    | 36  | 64  | 0   |
| Wash basin                                              | 31  | 62  | 7   |
| <b>Supplementary equipment</b>                          |     |     |     |
| Magills forceps                                         |     |     |     |



|                                 |    |    |    |
|---------------------------------|----|----|----|
| — Adult                         | 24 | 44 | 64 |
| — Paediatric                    | 7  | 46 | 77 |
| Endotracheal tubes              | 8  | 45 | 77 |
| IV infusor bags                 | 8  | 45 | 77 |
| Chest tubes insertion equipment | 8  | 23 | 69 |
| Laryngoscope                    |    |    |    |
| — Adult                         | 23 | 23 | 54 |
| — Paediatric                    | 8  | 23 | 69 |
| Cricothyroidotomy set           | 8  | 8  | 84 |

**Table 54. Availability of ~~Emergency Equipment and Supplies for~~ Capital Outlays for Resuscitation.**

% Number of facilities where element is always, sometimes, or never available. N=14

| <b>Renewable</b>                                        |   |    |   |
|---------------------------------------------------------|---|----|---|
| Suction catheter sizes 16 FG                            | 2 | 5  | 6 |
| Tongue depressor wooden disposable                      | 3 | 7  | 3 |
| Nasogastric tubes 10 to 16 FG                           | 2 | 10 | 2 |
| Light source (lamp & flash light)                       | 4 | 9  | 1 |
| Intravenous fluid infusion set                          | 3 | 9  | 2 |
| IV cannulas                                             | 4 | 8  | 2 |
| Scalp vein infusion set                                 | 3 | 7  | 3 |
| Syringes 2ml                                            | 4 | 9  | 1 |
| Syringes 10 ml                                          | 4 | 10 | 0 |
| Disposable needles                                      | 5 | 8  | 1 |
| Sharps disposal container                               | 5 | 8  | 1 |
| Tourniquet                                              | 4 | 8  | 1 |
| Sterile gauze dressing                                  | 3 | 8  | 2 |
| Bandages sterile                                        | 3 | 7  | 3 |
| Adhesive tape                                           | 3 | 9  | 1 |
| Needles, cutting & round bodied (for suturing)          | 4 | 8  | 2 |
| Suture synthetic absorbable                             | 4 | 6  | 3 |
| Splints for arm, leg                                    | 2 | 8  | 4 |
| Towel cloth                                             | 2 | 8  | 3 |
| Absorbent cotton wool                                   | 2 | 10 | 1 |
| Urinary catheter Foleys disposable #12, 14, 18 with bag | 3 | 7  | 3 |
| Sheeting, plastic for examination table                 | 4 | 7  | 3 |
| Waste disposal container                                | 4 | 8  | 2 |
| Face masks                                              | 4 | 8  | 2 |
| Eye protection                                          | 2 | 5  | 7 |
| Apron, plastic reusable                                 | 3 | 9  | 2 |
| Soap                                                    | 5 | 9  | 0 |

|                   |          |          |          |
|-------------------|----------|----------|----------|
| <u>Wash basin</u> | <u>4</u> | <u>8</u> | <u>1</u> |
|-------------------|----------|----------|----------|

**Table 6. Availability of Renewable Supplies for Resuscitation**

Number of facilities where element is always, sometimes, or never available. N=14

| <b>Supplementary equipment</b>         |          |          |           |
|----------------------------------------|----------|----------|-----------|
| <u>Magills forceps</u>                 | <u>3</u> | <u>2</u> | <u>9</u>  |
| <u>Adult</u>                           |          |          |           |
| <u>Paediatric</u>                      | <u>1</u> | <u>2</u> | <u>10</u> |
| <u>Endotracheal tubes</u>              | <u>1</u> | <u>2</u> | <u>10</u> |
| <u>IV infusor bags</u>                 | <u>1</u> | <u>2</u> | <u>10</u> |
| <u>Chest tubes insertion equipment</u> | <u>1</u> | <u>3</u> | <u>9</u>  |
| <u>Laryngoscope</u>                    | <u>3</u> | <u>3</u> | <u>7</u>  |
| <u>Adult</u>                           |          |          |           |
| <u>Paediatric</u>                      | <u>1</u> | <u>3</u> | <u>9</u>  |
| <u>Cricothyroidotomy set</u>           | <u>1</u> | <u>1</u> | <u>11</u> |

**Table 7. Availability of Supplementary Equipment for Resuscitation**

Number of facilities where element is always, sometimes, or never available. N=14

**LIMITATIONS**

There are a several limitations to this survey. First, it provides only a brief overview of the capacity for surgical care and cannot be used for detailed programme planning. Second, it does not capture data from every first-referral health facility of the country; however, a majority of the first-referral health facilities identified by the MoH and WHO Somalia have responded, allowing us to provide a glimpse into the state of basic surgical capacity in the country. Third, some of the data was taken after the WHO IMEESC toolkit was implemented in the country, and results should be qualified by the possibility of interpretation constraints of the survey.

**DISCUSSION**

Surgically treatable diseases are among the top 15 causes of disability,[167] and conservative estimates show that 11% of the world’s Disability-Adjusted life years (DALYs) stem from surgically treated conditions.[1] In 2004, South East Asia and Africa accounted for 54% of the global burden,[178] and since then the burden of surgical disease is thought to be increasing.[167]

More than 2 billion people globally are without access to surgical care.[189] Of the 243 million surgical procedures performed globally each year, the 34.8% of the world’s population living in low-income countries only have access to 8.1 million (only 3.5%) of such procedures.[2] As a result, rates of maternal mortality are high, minor surgical pathologies become lethal, and treatable trauma progresses to death.

Despite the great unmet need and inclusion in policy-level dialogue on primary health care, the delivery of emergency surgical care has long been sidelined in global financing

Formatted: Normal

Formatted: Font: 12 pt

Formatted: Font: Not Bold

Formatted: Font: Not Bold

1  
2  
3  
4  
5  
6  
7  
8 and policy debates, largely due to perceived complexity and cost. Further, despite the  
9 large and growing need for expanding access to surgical care, human resources, metrics  
10 and science focused on global surgery, and sustained financing mechanisms for surgical  
11 infrastructure lag behind other public health priorities (Smith-Rohrberg Maru, D, McGee,  
12 HM, Brady, JS et al. Global Surgical Care in 2030: Metrics and Strategies for Expansion  
13 in Access and Quality. 2013. [www.worldwewant2015.org/file/298623/download/323967](http://www.worldwewant2015.org/file/298623/download/323967))  
14

15 Enormous shortfalls in infrastructure, supplies, and procedures undertaken are common at  
16 district-level health facilities in LMICs.<sup>[19+0]</sup> Every \$1 spent strengthening local  
17 surgical capacity generates \$10 through improved health and increased  
18 productivity.<sup>[20+4]</sup> In 2008, the Copenhagen Consensus Center's research identified  
19 strengthening surgical capacity, particularly at the district hospital level, as a highly cost-  
20 efficient solution to global diseases. Notably, strengthening local surgical capacity is an  
21 approach that would both provide a high degree of financial protection to populations and  
22 address the most DALYs in a cost effective manner.<sup>[1]</sup> In fact, the benefit-cost-ratio for  
23 the expansion of surgical capacity at district hospitals was found to be 10:1.<sup>[21+2]</sup>  
24 Further, due to the implementation of "vertical" programmes in public health (i.e. child  
25 health, maternal health, cancer, and trauma), in which most programmes contain some  
26 surgical component, strengthening surgical services may improve health system  
27 overall.<sup>[22+3]</sup>

28 This study provides an overview of the capacity for surgical care representing health  
29 facilities from in all 3 administrative zones, including 10 regions of 18 in Somalia, and  
30 demonstrates the significant gaps in infrastructure, life-saving and disability-preventive  
31 surgical interventions and essential equipment. Of the 14 reporting health facilities, 12  
32 identified as full hospitals, serving an average patient population of over 300,000 people,  
33 further indicating the need for surgical care system strengthening.  
34

35 Of the 35 basic surgical and anaesthesia interventions, most hospitals were unable to  
36 provide all of the basic surgical services. Major essential procedures such as Caesarean  
37 section, appendectomy, elective hernia repair, laparotomy, and hydrocele were offered at  
38 a majority of hospitals, but these conflicted directly with the continuous availability of  
39 basic and necessary supplies and infrastructures. Only 3 facilities had any consistent  
40 access to oxygen cylinders, and even less reported access to tubing, valves, and masks.  
41

42 Necessary procedures including resuscitation and airway management were offered at a  
43 majority (79%) of facilities. Those reporting the inability to provide resuscitation  
44 procedures, however, all reported the provision of major surgical procedures that would  
45 require provision and knowledge of those same procedures. The facilities in questions  
46 could not be contacted for confirmation.  
47

48 Still, many facilities lacked access to key equipment and supplies such as provisional  
49 oxygen equipment, oropharyngeal airways, and IV cannulas. Only 2 facilities reported  
50 access to a functional anaesthesia machines, and few facilities noted the ability to provide  
51 general anaesthesia inhalation. Both oxygen and anaesthesia are essential medicines,  
52 (WHO Model List of Essential Medicines. World Health Organizations. 2013.  
53 [http://www.who.int/medicines/publications/essentialmedicines/18th\\_EML\\_Final\\_web\\_8J](http://www.who.int/medicines/publications/essentialmedicines/18th_EML_Final_web_8J)  
54  
55  
56  
57  
58  
59  
60

1  
2  
3  
4  
5  
6  
7  
8 [ul13.pdf](#)) and the existing deficit limits the availability safe and effective life-saving  
9 surgeries in Somalia or can result in significant complication or unnecessary patient  
10 suffering when these medicines are not provided.[23+4]

11 A surprising low amount of facilities reported having access to equipment necessary for  
12 the prevention of HIV transmission and other infection control. Less than half of the  
13 facilities reported access to sterile gloves, waste disposal containers, face masks, eye  
14 masks, aprons, and even soap and only slight more than half of the facilities had access to  
15 a sterilizer, all key components in the reduction of HIV transmission (WHO Prevention  
16 of Transmission of HIV. 2007.

17 <http://www.who.int/surgery/publications/HIVprevention.pdf>)

18  
19 A majority of the facilities lacked any formal guidelines for the management of  
20 emergency care, surgery, pain relief, or anaesthesia, providing a significant barrier to the  
21 strengthening of emergency and surgical care services and severely limiting their ability  
22 to respond to large scale disaster and crisis situations.

23  
24 The severe gaps in infrastructure and capital entail obstacles for the delivery of basic  
25 primary care in these facilities as well. Absence of key infrastructural elements such as  
26 water, electricity, and oxygen, as well as the lack of consistent renewable sterilization  
27 tools and supplies involved in infection prevention (bandages, alcohol, gloves, aprons,  
28 soap, etc.) is common among the facilities depicted. Establishing management guidelines  
29 for surgical infrastructure and targeted development in improving access to these lacking  
30 areas would not only increase the quality of surgical services but also that of basic  
31 primary care services offered by these facilities.

32  
33  
34 ~~The provision of safe and effective surgical care is dependent on the presence of all~~  
35 ~~components inherent in a functional health system. Systematic investments and changes~~  
36 ~~that address and strengthen the availability of appropriately trained human resources,~~  
37 ~~capital outlays, and necessary infrastructure are necessary to decrease mortality from~~  
38 ~~surgically treatable conditions. Further, s~~Strengthening of surgical systems will not only  
39 reduce the disease burden of surgically related issues but can also increase progress  
40 toward achieving the 2015 Millennium Development Goals (MDGs). Strengthening  
41 surgical care delivery can help achieve MDGs 1 (eradication of poverty),[189] 4 (child  
42 health), 5 (maternal health), and 6 (HIV/AIDS prevention).[21+2] ~~Systematic changes~~  
43 ~~such and i~~Investments in oxygen and related equipment and ~~appropriately trained surgical~~  
44 ~~workforce~~basic infrastructural needs, such as electricity and running water, will also  
45 serve to benefit patients suffering from a range of conditions ~~including sepsis, pneumonia,~~  
46 ~~HIV-related conditions and other infectious diseases.~~

47  
48  
49 To meet the needs of LMICs, the WHO Emergency and Essential Surgical Care (EESC)  
50 program with its partners worldwide developed the *Integrated Management for*  
51 *Emergency and Essential Surgical Care* (IMEESC) toolkit (WHO IMEESC Toolkit:  
52  
53  
54  
55  
56  
57  
58  
59  
60

1  
2  
3  
4  
5  
6  
7  
8 <http://www.who.int/surgery/en>). It guides policies, research for evidence-based planning  
9 (WHO EESC Situation Analysis Tool to assess emergency, trauma, obstetrics, anesthesia  
10 and surgical services, WHO EESC Global Database), trainings, best practice protocols at  
11 point-of-care, monitoring and evaluation of the progress of surgical care systems. The  
12 IMEESC toolkit provides guidance for policymakers, managers, and providers at various  
13 levels of care, instructional videos, training modules on Emergency & Trauma Care for  
14 frontline health workers, disaster-management resources, and monitoring and evaluation.

15  
16  
17 ~~There are a several limitations to this survey. First, it provides only a brief overview of~~  
18 ~~the capacity for surgical care and cannot be used for detailed programme planning.~~  
19 ~~Second, it does not capture data from every first referral health facility of the country;~~  
20 ~~however, a majority of first referral health facilities identified by the MoH and WHO~~  
21 ~~Somalia have responded, allowing us to provide a glimpse into the state of basic surgical~~  
22 ~~capacity in the country. Third, some of the data was taken after the WHO IMEESC~~  
23 ~~toolkit was implemented in the country, and results should be qualified by the possibility~~  
24 ~~of interpretation constraints of the survey.~~

25  
26  
27 ~~However,~~ this study provides insight into the surgical capacity of Somalia, using the  
28 WHO Tool for Situational Analysis to Assess Emergency and Essential Surgical Care.

29 ~~The survey identified significant gaps and areas for improvement towards evidence-based~~  
30 ~~planning to improve surgical infrastructure, skills training, and equipment and supplies.~~

31 Addressing these gaps identified by this study and the strengthening of surgical services  
32 within existing related national programmes are needed to strengthen health systems as a  
33 wholeholistically in Somalia, particularly at the district and sub-district level.[2415]

34 Further research is needed to determine the burden of surgical disease in Somalia and to  
35 determine the cost-benefit of specific interventions to improve surgical services.

36  
37  
38 **Disclaimer:** The authors include staff members of WHO. They are responsible for the  
39 views expressed in this publication and do not necessarily represent the decisions or  
40 stated policy of WHO.

41  
42 **Contributors:** NE analyzed and interpreted the data, drafted the article, revised it and  
43 finally approved the submitted version. AS analyzed and interpreted the data, drafted the  
44 article, revised it and finally approved the submitted version. MC contributed to  
45 conception and design, acquisition and interpretation of data, helped draft the article,  
46 made critical revisions and finally approved the submitted version. OS contributed to  
47 acquisition of data, made critical revisions and finally approved the submitted version.  
48 ME contributed to acquisition of data, made critical revisions and finally approved the  
49 submitted version. GP contributed to acquisition of data, made critical revisions and  
50 finally approved the submitted version. AI contributed to acquisition of data, made  
51 critical revisions and finally approved the submitted version.

52 **Acknowledgements:** The following members of GIEESC in Somalia were instrumental  
53 in obtaining the reported data: Yassin Arab Abdi, Dr. Nima Abdi Hassan, Mohamed  
54  
55  
56  
57  
58  
59  
60

Samy Salama, Dr. Mahmoud Mostafa El-Antably, Dr. Soleh Abdullah Omar, Jamal Mohamed Jama, Abdulcadir Mohamud Giama, Nura Mohamed Ahmed, Saeed Hussien Legeh, Risaaq Mohamoud Yousuf, Cabdi Qaadu Bikri, Ahmed Jama, Dr. Muse Geele, Noor M. Noor.

**Funding Statement:** This research received no specific grant from any funding agency in the public, commercial or not-for-profit sectors.

**Competing interests:** None.

**Data sharing statement:** No additional data are available, all has been included.

## REFERENCES

1. Debas HT, Gosselin R, McCord C, et al. Surgery. In: Jamison D, ed. Disease Control Priorities in Developing Countries. 2<sup>nd</sup> edn. New York: Oxford University Press, 2006:1245-59.
2. Weiser TG, Regenbogen SE, Thompson KD, et al. An estimation of the global volume of surgery: a modelling strategy based on available data. *Lancet* 2008;**372**:139-44.
3. World Health Organisation. Regional Office for the Eastern Mediterranean, Cairo. Country Cooperation Strategy for WHO and Somalia 2010-2014. 2010.
4. UNICEF. The private sector and health: a survey of Somaliland private pharmacies. 2008.
5. UNDP. Population projections. 2007.
6. UNDP. Millennium Development Goals Report for Somalia. 2007.
7. [Penoyar T, Cohen H, Kibatala P, et al. Emergency and surgery services of primary hospitals in United Republic of Tanzania. \*BMJ Open\* 2012; \*\*2\*\*\(1\): e000369.](#)
8. [Natuzzi ES, Kushner A, Jagilly R, et al. Surgical Care in the Solomon Islands: a road map for universal surgical care delivery. \*World J Surg\* 2011; \*\*35\*\*\(6\):1183-93.](#)
9. [Idriss A, Shivute N, Bickler S, et al. Emergency, anaesthetic and essential surgical capacity in the Gambia. \*Bull World Health Organ\*. Epub 2011 May.](#)
10. [Sherman L, Clement P, Cherian M, et al. Implementing Liberia's Poverty Reduction Strategy: An Assessment of Emergency and Essential Surgical Care. \*Arch Surg\* 2011; \*\*146\*\*: 35 - 39.](#)

Formatted: Font: Font color: Black, English (U.S.)

Formatted: Font: Times New Roman, 12 pt

Formatted: Bullets and Numbering

Formatted: Font: Times New Roman, 12 pt, Bold

Formatted: Font: Times New Roman, 12 pt

Formatted: Font color: Auto, Pattern: Clear

Formatted: Font: Times New Roman, 12 pt

Formatted: Bullets and Numbering

Formatted: Font: Times New Roman, 12 pt, Bold

Formatted: Font: Times New Roman, 12 pt

Formatted: Font color: Auto, Pattern: Clear

Formatted: Font: Times New Roman, 12 pt

Formatted: Bullets and Numbering

Formatted: Font color: Auto, Pattern: Clear

Formatted: Font: Times New Roman, 12 pt

Formatted: Bullets and Numbering

Formatted: Font: Times New Roman, 12 pt, Bold

Formatted: Font: Times New Roman, 12 pt

Formatted: Font color: Auto, Pattern: Clear

Formatted: Font: Times New Roman, 12 pt

11. Choo S, Perry H, Hesse AA, et al. Assessment of capacity for surgery, obstetrics and anaesthesia in 17 hospitals in Ghana using a WHO assessment tool. *Trop Med Int Health* 2010 September.

Formatted: Bullets and Numbering

12. Contini S, Faqdeer A, Cherian M, et al. Emergency and Essential Surgical Services in Afghanistan: Still a Missing Challenge. *World J Surg* 2010 January.

Formatted: Font: Times New Roman, 12 pt

Formatted: Font color: Auto, Pattern: Clear

Formatted: Font: Times New Roman, 12 pt

Formatted: Bullets and Numbering

13. Taira BR, Cherian MN, Yakandawala H, et al. Survey of Emergency and Surgical Capacity in the Conflict-Affected Regions of Sri Lanka. *World J Surg* 2009 October.

Formatted: Font color: Auto, Pattern: Clear

Formatted: Font: Times New Roman, 12 pt

Formatted: Bullets and Numbering

14. Kingham TP, Kamara TB, Cherian MN, et al. Quantifying Surgical Capacity in Sierra Leone: A Guide for Improving Surgical Care. *Arch Surg* 2009;144(2):122-127.

Formatted: Font color: Auto, Pattern: Clear

Formatted: Font: Times New Roman, 12 pt

Formatted: Bullets and Numbering

15. Cherian MN, Noel L, Buyanjargal Y, et al. Essential emergency and surgical procedures in resource-limited facilities: a WHO workshop in Mongolia. *World Hosp Health Serv* 2004;40(4):24-29.

Formatted: Font: Times New Roman, 12 pt, Bold

Formatted: Font: Times New Roman, 12 pt

Formatted: Font: 12 pt

Formatted: Font: Times New Roman, 12 pt

Formatted: Font color: Auto, Pattern: Clear

Formatted: Font: Times New Roman, 12 pt

Farmer P, Kim J. "Surgery and global health: a view from beyond the OR." *World J Surg* 2008;32(4):533-536.

Formatted: Space Before: 0 pt, After: 0 pt, Line spacing: single, Numbered + Level: 1 + Numbering Style: 1, 2, 3, ... + Start at: 1 + Alignment: Left + Aligned at: 0.25" + Indent at: 0.5", Pattern: Clear

Johnson, WD. Surgery as a Global Health Issue. *Surg Neurol Int*. First: 03 April 2013. doi:10.4103/2152-7806.110030

Funk, LM, Weiser, TG, Berry, WR, et al. "Global Operating Theatre Distribution and Pulse Oximetry Supply: an Estimation from Reported Data." *Lancet*. 2010;376(9746): 1055-1061.

Formatted: Bullets and Numbering

Formatted: Font: Times New Roman, 12 pt, Bold

Kushner AI, Cherian MN, Shokohmand, AS, et al. Addressing the Millennium Development Goals from a surgical perspective: essential surgery and anesthesia in 8 low- and middle-income countries. *Arch Surg* 2010;145(2): 154-159.

Formatted: Font: Times New Roman, 12 pt

Formatted: Font: 12 pt

Formatted: Font: Times New Roman, 12 pt

Formatted: Font: Font color: Auto

United Nations. A New Global Partnership: Eradicate Poverty And Transform Economies Through Sustainable Development: The Report of the High-Level Panel of Eminent Persons on the Post-2015 Development Agenda. United Nations Publication 2013.

Formatted: Font: Bold

Jamison, D, Jha, P, Bloom, D. Diseases – disease control. In: Lomborg, B. *Global Crises, Global Solutions*: 2<sup>nd</sup> ed. New York: Cambridge University Press. 2009:129-163.

Ozgediz, D, Jamison, D, McQueen, K. The burden of surgical conditions and access to surgical care in low- and middle-income countries. *Bull World Health Organ* 2008;86(8):646-647

Cherian, MN, Merry, AF, Wilson, IH. The World Health Organization and Anaesthesia. *Anaesthesia*, 2007;62:65-66

1  
2  
3  
4  
5  
6  
7  
8 | 15:24. Hedges JP, Mock CN, Cherian MN. The Political Economy of emergency  
9 and essential surgery in global health. *World J Surg* 2010;**34**:2003–  
10 2006. [PubMed: 20454792]  
11  
12  
13  
14  
15  
16  
17  
18  
19  
20  
21  
22  
23  
24  
25  
26  
27  
28  
29  
30  
31  
32  
33  
34  
35  
36  
37  
38  
39  
40  
41  
42  
43  
44  
45  
46  
47  
48  
49  
50  
51  
52  
53  
54  
55  
56  
57  
58  
59  
60



1  
2  
3  
4  
5  
6  
7  
8  
9  
10  
11  
12  
13  
14  
15  
16  
17  
18  
19  
20  
21  
22  
23  
24  
25  
26  
27  
28  
29  
30  
31  
32  
33  
34  
35  
36  
37  
38  
39  
40  
41  
42  
43  
44  
45  
46  
47  
48  
49  
50  
51  
52  
53  
54  
55  
56  
57  
58  
59  
60

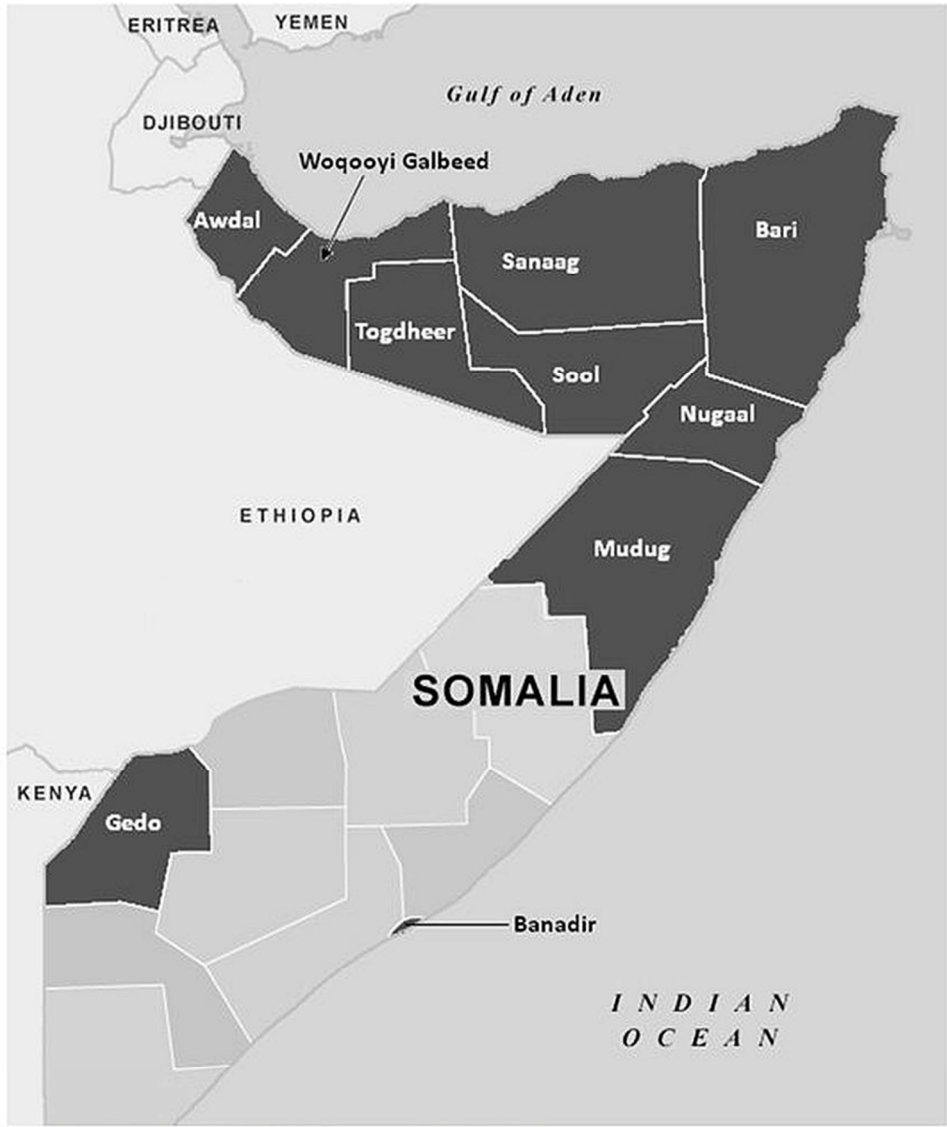

**Figure 1.** Participating regions of Somalia.

Figure 1: Participating regions of Somalia  
75x90mm (300 x 300 DPI)



## A Survey of Essential Surgical Capacity in Somalia

|                                 |                                                                                                                                                                                                                                                                                                                                                                                         |
|---------------------------------|-----------------------------------------------------------------------------------------------------------------------------------------------------------------------------------------------------------------------------------------------------------------------------------------------------------------------------------------------------------------------------------------|
| Journal:                        | <i>BMJ Open</i>                                                                                                                                                                                                                                                                                                                                                                         |
| Manuscript ID:                  | bmjopen-2013-004360.R2                                                                                                                                                                                                                                                                                                                                                                  |
| Article Type:                   | Research                                                                                                                                                                                                                                                                                                                                                                                |
| Date Submitted by the Author:   | 29-Jan-2014                                                                                                                                                                                                                                                                                                                                                                             |
| Complete List of Authors:       | Elkheir, Natalie; St George's Hospital, London, Sharma, Akshay; Harvard University, Harvard College<br>Cherian, M; World Health Organization, Emergency and Essential Surgical Care<br>Saleh, Omar; World Health Organization Somalia, Everard, Marthe; World Health Organization Somalia, Popal, Ghulam; World Health Organization Somalia, Ibrahim, Abdi; Ministry of Health Somalia, |
| <b>Primary Subject Heading</b>: | Surgery                                                                                                                                                                                                                                                                                                                                                                                 |
| Secondary Subject Heading:      | Anaesthesia, Global health, Health services research, Obstetrics and gynaecology, Medical management                                                                                                                                                                                                                                                                                    |
| Keywords:                       | ANAESTHETICS, Health & safety < HEALTH SERVICES ADMINISTRATION & MANAGEMENT, Quality in health care < HEALTH SERVICES ADMINISTRATION & MANAGEMENT, MEDICAL EDUCATION & TRAINING, SURGERY, WOUND MANAGEMENT                                                                                                                                                                              |
|                                 |                                                                                                                                                                                                                                                                                                                                                                                         |

SCHOLARONE™  
Manuscripts

only

# A Survey of Essential Surgical Capacity in Somalia

## Corresponding Author:

Akshay Sharma  
254 Cabot Mail Center  
Cambridge, MA USA  
Phone: 001-949-735-4736  
Email: akshay1227@gmail.com

## Co-Authors:

Dr. Natalie Elkheir<sup>1</sup>; Akshay Sharma<sup>2</sup>; Dr. Meena Cherian<sup>3</sup>; Dr. Omar Abdelrahman Saleh<sup>4</sup>; Dr. Marthe Everard<sup>5</sup>; Dr. Ghulam Rabani Popal<sup>6</sup>; Dr Abdi Awad Ibrahim<sup>7</sup>

<sup>1</sup>St George's Hospital, London, United Kingdom

<sup>2</sup>Harvard College, Harvard University, Cambridge, Massachusetts, USA

<sup>3</sup>Emergency & Essential Surgical Care Programme, Health Systems and Innovation, World Health Organisation - HQ, Geneva, Switzerland

<sup>4</sup>Emergency Humanitarian Action Coordinator, World Health Organisation Somalia, Nairobi, Kenya

<sup>5</sup>World Health Organisation Somalia, Nairobi, Kenya

<sup>6</sup>WHO Representative Somalia, World Health Organisation Somalia, Nairobi, Kenya

<sup>7</sup>Resident Advisor to the Minister of Health Somalia, Ministry of Health Somalia, Mogadishu, Somalia

**Keywords:** Surgery, Somalia, Emergency, Anaesthesia, Trauma

**Word count:** 2,679

## ABSTRACT

**Objective:** To assess life-saving and disability-preventing surgical services (including emergency, trauma, obstetrics, anaesthesia) of health facilities in Somalia and to assist in the planning of strategies for strengthening surgical care systems.

**Design:** Cross-sectional survey.

**Setting:** Health facilities in all 3 administrative zones of Somalia; northwest Somalia (NWS), known as Somaliland; northeast Somalia (NES), known as Puntland; and south/central Somalia (SCS).

**Participants:** 14 health facilities

**Measures:** The WHO Tool for Situational Analysis to Assess Emergency and Essential Surgical Care was employed to capture a health facility's capacity to deliver surgical and anaesthesia services by investigating four categories of data: infrastructure; human resources; interventions available; and equipment.

**Results:** The 14 facilities surveyed in Somalia represent 10 of 18 districts throughout the country. The facilities serve an average patient population of 331,250 people, and 12 of 14 identify as hospitals. While major surgical procedures were provided at many facilities (caesarean Section, laparotomy, appendicectomy, etc.), only 22% had fully available oxygen access, 50% fully available electricity, and less than 30% had any management guidelines for emergency and surgical care. Furthermore, only 36% were able to provide general anaesthesia inhalation due to lack of skills, supplies, and equipment. Basic supplies for airway management and the prevention of infection transmission were severely lacking in most facilities.

**Conclusions:** According to the results of the WHO Tool for Situational Analysis to Assess Emergency and Essential Surgical Care survey, there exist significant gaps in the capacity of emergency and essential surgical services in Somalia including inadequacies in essential equipment, service provision, and infrastructure. The information provided by the WHO tool can serve as a basis for evidenced-based decisions on country-level policy regarding the allocation of resources and provision of emergency and essential surgical services.

## ARTICLE SUMMARY

### Article Focus

- On-site visits to primary health centres in a developing nation
- Evaluate capacity to deliver emergency and essential surgical care

### Strengths and limitations of this study

- Provides insight into the surgical capacity of Somalia
- Identifies significant gaps and areas for improvement towards evidence-based planning to improve surgical infrastructure, skills training, and equipment and supplies
- Does not capture data from every first-referral health facility of the country
- In some cases, measures captured are estimates

## INTRODUCTION

Conditions that can be treated with surgery account for 11% of the world's disability-adjusted life years.[1] Despite recent data estimating the global volume of surgery at 234 million surgical procedures annually and significant disparities between procedures performed in high- and low- income countries, global public health initiatives have traditionally neglected the necessity for the provision of surgical services.[2] Poor access to surgical services, particularly at rural facilities, results in excess morbidity and mortality from a broad range of treatable surgical conditions including injuries, complications of pregnancy, sequelae of infectious diseases, acute abdominal conditions and congenital abnormalities. Improving the access to surgical services in low-income countries requires addressing gaps in infrastructure, the training and skills of personnel, appropriate equipment and medications.

## BACKGROUND

Somalia's 21 years of war, armed conflict and insecurity have had a devastating effect on the health sector. The current situation is at its worst level since the beginning of the civil war in 1991, with unprecedented levels of child malnutrition and internal displacement, as well as conflict and insecurity rife in some parts of the country.[3] Continuing conflict has left 90% of health infrastructure looted, damaged or destroyed.[4] The low health workforce ratios before the war have depreciated through high levels of healthcare worker emigration, leaving an estimated 3 physicians per 100000 population (total 253 physicians), 11 nurses per 100 000 population (861 nurses) and 2 midwives per 100 000 population (116 midwives) serving the whole country.[5]

Rates of death and disability from treatable surgical conditions continue to be unacceptably high. Somalia's maternal mortality rate is estimated to be 1044 per 100 000 live births, one of the highest in the region.[6] This corresponds to a lifetime risk of one maternal death for every 10 women. The leading causes of maternal death (ante-partum and postpartum haemorrhage, obstructed labour and eclampsia) can all be addressed with appropriate emergency obstetric care, which often require surgical and anaesthetic interventions. Trauma, as a consequence of road traffic accidents, armed fighting and landmine explosions, is also common. In 2010 and 2011, WHO reported more than 7500 war-wounded civilians who were admitted to three main hospitals in Mogadishu, one in five being children and one in three women (World Health Organization. Emergency and Essential Surgical Care. 2013. [www.who.int/surgery/en/](http://www.who.int/surgery/en/))

The health sector faces overwhelming challenges in a country where two decades of lawlessness have resulted in the collapse of central government and 3 almost autonomously-ruled zones: northwest Somalia (NWS), known as Somaliland; northeast Somalia (NES), known as Puntland; and south/central Somalia (SCS). Somalia's public health system is tiered, comprising regional referral hospitals, district hospitals, maternal

1  
2  
3 and child health centres and health posts. However, hospitals and health facilities are  
4 limited in number, inadequately distributed, operate using vastly different standards, and  
5 often cannot provide a minimum package of primary health care (PHC) services. As  
6 funders and public health experts adopt the expansion of primary healthcare services, the  
7 inclusion of surgical services at the first-referral level is critical. The purpose of this  
8 survey was to collect knowledge gained from comprehensive quantitative assessments of  
9 surgical capacity in Somalia in order to assist in planning strategies for universal access  
10 to life-saving and disability-preventing surgical services (World Health Organization.  
11 Emergency and Essential Surgical Care. 2013. [www.who.int/surgery/en/](http://www.who.int/surgery/en/)).  
12  
13

14  
15 Similar studies using the WHO Situational Analysis tool have been conducted in  
16 Tanzania,[7] Solomon Islands,[8] Gambia,[9] Liberia,[10] Ghana,[11] Afghanistan,[12]  
17 Sri Lanka,[13] Sierra Leone,[14] and Mongolia.[15]  
18

## 19 **OBJECTIVE**

20  
21  
22 The objective of this study was to assess life-saving and disability-preventing surgical  
23 services (including emergency, trauma, obstetrics, anaesthesia) of health facilities in  
24 Somalia and to assist in the planning of strategies for strengthening surgical care systems.  
25  
26

27 To assess the current capacity for essential anesthesia and surgical services in Somalia  
28 with the purpose of providing a benchmark for critical areas needing improvement.  
29

## 30 **METHODS**

31  
32 The WHO Tool for Situational Analysis to Assess Emergency and Essential Surgical  
33 Care was employed to capture a health facility's capacity to perform basic surgical  
34 (including obstetrics and trauma) and anaesthesia interventions by investigating four  
35 categories of data: infrastructure, human resources, interventions provided and equipment  
36 availability. The tool queries the availability of 8 types of care providers, 35 surgical  
37 interventions and 67 items of equipment.[7] The answer of available was defined as  
38 "fully available for all patients all of the time," while sometimes was defined as  
39 "available with frequent shortages or difficulties".(WHO EESC Situational Analysis Tool.  
40 2012. [http://www.who.int/surgery/publications/WHO\\_EESC\\_SituationAnalysisTool.pdf](http://www.who.int/surgery/publications/WHO_EESC_SituationAnalysisTool.pdf)).  
41  
42

43  
44 Facilities were also asked the size of the 'population served', intending to quantify the  
45 population living in the catchment area. This value represents the number of residents  
46 who might use the facility as their first-referral health facility, not the number of patients  
47 seen.  
48

49  
50 The WHO Tool for Situational Analysis to Assess Emergency and Essential Surgical  
51 Care was distributed by the Ministry of Health and WHO Somalia to 20 first-referral-  
52 level-health facilities around the country and was completed at 14 health facilities  
53 representing 10 of the 18 regions of Somalia and all 3 administrative zones. The survey  
54 was extended to regional medical officers and facility administrators. Participation in the  
55 survey and reporting to the WHO was voluntary. The physical surveys were then  
56 obtained either by post directly to the WHO Somalia office (Nairobi, Kenya) or by site  
57  
58  
59  
60

visits from the Somalia Ministry of Health (MoH), the WHO country office and members of the Global Initiative for Emergency and Essential Surgical Care (GIEESC) between September 2011 and April 2012...

Despite efforts to standardize the reporting and the collection of much of the data by site-visits performed by agents affiliated to the authors, it must be noted that an inherent reporting bias may be present in the data, given that survey data was compiled by different agents at each site. Furthermore, in a limited number of cases, facilities did not respond to individual questions. Blank answers were considered as neither a positive or negative answer, but simply deemed as unreported.

The collected data were then entered into and analyzed from WHO Global DataCol Database for Emergency and Essential Surgical Care.

## RESULTS

- i Health facility characteristics**
- ii Infrastructure**
- iii Human resources**
- iv Interventions**
- v Equipment**

Data were gathered from 14 health facilities in 10 regions (out of 18) across Somalia, as featured figure 1 and table 1. The 6 facilities that received the survey but did not return information are also listed below. Non-reporting can be attributed to a lack of consistent operation, inability to gather the data, and the pervasive political instability and high security risk throughout the country, making the transmission of this data difficult and costly.

| <b>Type of Facility</b> (Self-identified) | <b>Name of Facility</b>   | <b>Region</b>   | <b>Number of Beds</b> | <b>Operating Theaters</b> |
|-------------------------------------------|---------------------------|-----------------|-----------------------|---------------------------|
| <b>General Hospital</b>                   | Garowe Hospital           | Nugaal          | 51-80                 | 11-20                     |
|                                           | Gardo General Hospital    | Bari            | 21-50                 | 1                         |
|                                           | Hergeisa Group Hospital   | Woqooyi Galbeed | 301-400               | 5-10                      |
| <b>Provincial Hospital</b>                | Borama General Hospital   | Awdal           | 201-300               | 1                         |
|                                           | Burao Regional Hospital   | Togdeer         | 201-300               | 1                         |
|                                           | Berbera Referral Hospital | Woqooyi Galbeed | 101-200               | 2                         |
|                                           | Erigavo Regional Hospital | Sanaag          | 81-100                | 1                         |
|                                           | Sool Regional Hospital    | Sool            | 81-100                | 1                         |
| <b>Health Centre</b>                      | Doolow Health Centre      | Gedo            | 5-10                  | 1                         |
|                                           | Galkayo Medical Centre    | Mudug           | 51-80                 | 3-4                       |

|                                            |                                  |                 |         |      |
|--------------------------------------------|----------------------------------|-----------------|---------|------|
| <b>Private/NGO/Mission Hospital</b>        | Galkayo Specialist Hospital      | Mudug           | 3-4     | 1    |
|                                            | Medina Hospital                  | Banadir         | 201-300 | 5-10 |
|                                            | Maani Hospital                   | Banadir         | 21-50   | 1    |
|                                            | Manhal Specialty Hospital        | Woqooyi Galbeed | 51-80   | 5-10 |
| <b>Facilities Not Responding to Survey</b> | Shikh Hospital                   | Woqooyi Galbeed | N/A     | N/A  |
|                                            | Puntland Regional Hospital       | Bossaso         | N/A     | N/A  |
|                                            | General Medical Service Hospital | Mudug           | N/A     | N/A  |
|                                            | Wajed Hospital                   | Bakool          | N/A     | N/A  |
|                                            | Dinsor Hospital                  | Bakool          | N/A     | N/A  |
|                                            | Sama Hospital                    | Bay             | N/A     | N/A  |

**Table 1.** Surveyed health facilities. N=14

### **i. Health facility characteristics**

Of the 14 facilities that responded to the survey 5 were provincial hospitals, 5 were private/mission/NGO hospitals, 3 were general hospitals and 1 was a health centre. Each facility reported having at least 1 operating theatre, with a maximum of between 11 and 20 operating theatres. The populations served by each facility ranged from 100000 to 1000000 people, with the average population of the reporting facilities at 331,250 people.

### **ii. Infrastructure**

The emergency and surgical infrastructure of the 14 reporting facilities were largely inadequate, with only 22% of health facilities having oxygen cylinder supplies consistently available. 28% of facilities never or only sometimes had access to running water available and only 50% had a consistently available electricity source. Only 50% of the facilities had fully available access to both running water and electricity. Access to a functional anaesthesia machine was only present in 2 (15%) facilities, one of those facilities being a local health centre. Only 3 facilities reported access to a functioning pulse-oximeter.

50% of facilities had permanent areas designated for emergency care and only 38% of facilities had the same for postoperative care.

A minority of facilities had formal management guidelines for emergency care (3/14 = 21%), surgery (5/14 = 36%), anaesthesia (4/14 = 29%), or pain relief (1/14 = 7%).



Table 2 depicts the key infrastructural elements available in the health facilities accessed.

|                                                 | Always | Sometimes | Not Available |
|-------------------------------------------------|--------|-----------|---------------|
| Oxygen cylinder                                 | 3      | 1         | 10            |
| Running water                                   | 10     | 2         | 2             |
| Electricity source                              | 7      | 5         | 2             |
| Operational power generator                     | 2      | 2         | 9             |
| Blood bank                                      | 5      | 3         | 6             |
| Hemoglobin & urine testing                      | 12     | 2         | 0             |
| X-ray machine                                   | 8      | 4         | 2             |
| Medical records                                 | 10     | 3         | 1             |
| <b>Pulse Oximeter</b>                           | 3      | 0         | 8             |
| <b>Area designated for emergency care</b>       | 5      | 1         | 7             |
| <b>Area designated for postoperative care</b>   | 5      | 1         | 7             |
| <b>Management Guidelines for Emergency Care</b> | 3      | 1         | 10            |
| <b>Management Guidelines for Surgery</b>        | 5      | 0         | 9             |
| <b>Management Guidelines for Anaesthesia</b>    | 4      | 1         | 9             |
| <b>Management Guidelines for Pain relief</b>    | 1      | 3         | 10            |
| <b>Functioning anaesthesia machine</b>          | 7      | 5         | 2             |

**Table 2. Availability of infrastructure and health resources in Somalia, 2012**

Number of facilities where element is always, sometimes, or never available. Bolded items designate those that are specific to quality surgical care delivery. N=14

### iii. Human Resources

More data is needed to comment on human resources within healthcare in Somalia. In this section, blank answers to staffing questions impeded our ability to comment on the state of the workforce completely. We did however summarise the results to survey questions of which all or a majority of facilities supplied data.

The 14 facilities together reported a total of 137 healthcare providers. Only 15 (11%) individuals were identified as full time trained surgical specialists, located only at 9 out of 14 of the facilities. 14 (11%) were identified as obstetricians, and only 4 (3%) individuals were identified as qualified anesthetists and were located in only 3 of the 14 facilities, with 27 (20%) unlicensed medical staff (nurses, medical assistants, etc.) providing anesthetic services.

### iv. Interventions

Of the 35 interventions queried, only abscess incision and drainage are offered at all 14 facilities. Acute burn management, wound debridement, hydrocoele treatment, and male circumcision are widely provided by the surveyed facilities being offered at 85-86% of all facilities. Caesarean section is offered at 93% of all facilities.

Provision of anaesthesia services was severely lacking, however, with only 36% of facilities able to perform general anaesthesia inhalational procedures. Of the 8 facilities that answered why they could not provide this service, 1 (Doolow Health Center) attributed it to lack of skill and 4 (Borama General Hospital, Doolow Health Center, Erigavo Regional Hospital, Burao Regional Hospital) to lack of supplies or drugs. 1 facility (Gardo General Hospital) attributed it both to lack of skill and lack of equipment.

The ability of each health facility to provide basic surgical and anaesthesia procedures was assessed (tables 3 and 4).

| <b>General surgery &amp; trauma</b>                                                                           | <b>Available</b> |
|---------------------------------------------------------------------------------------------------------------|------------------|
| Resuscitation (airway, haemorrhage, peripheral percutaneous intravenous access, peripheral venous cut down)   | 11               |
| Cricothyroidotomy/ Tracheostomy                                                                               | 10               |
| Chest tube insertion                                                                                          | 9                |
| Removal of foreign body (throat/ear/eye/nose)                                                                 | 11               |
| Acute burn management                                                                                         | 12               |
| Incision & drainage of abscess                                                                                | 14               |
| Suturing (for wounds, episiotomy, cervical & vaginal lacerations)                                             | 13               |
| Wound debridement                                                                                             | 11               |
| Caesarean section                                                                                             | 13               |
| Dilatation & curettage (gynaecology/obstetrics)                                                               | 12               |
| Obstetric fistula repair                                                                                      | 7                |
| Appendicectomy                                                                                                | 11               |
| Hernia repair (strangulated, elective)                                                                        | 10               |
| Hydrocoele                                                                                                    | 12               |
| Cystostomy                                                                                                    | 9                |
| Urethral stricture dilatation                                                                                 | 11               |
| Laparotomy (uterine rupture, ectopic pregnancy, acute abdomen, intestinal obstruction, perforation, injuries) | 12               |
| Male circumcision                                                                                             | 12               |
| Congenital hernia repair                                                                                      | 9                |
| Neonatal surgery (abdominal wall defect, colostomy imperforate anus, intussusceptions)                        | 5                |
| Cleft lip repair                                                                                              | 10               |
| Clubfoot repair                                                                                               | 9                |
| Contracture release/ skin grafting                                                                            | 10               |

|                                            |        |      |
|--------------------------------------------|--------|------|
| Fracture treatment                         | Closed | Open |
|                                            | 10     | 8    |
| Joint dislocation treatment                | 9      |      |
| Drainage of osteomyelitis/septic arthritis | 9      |      |
| Amputation                                 | 11     |      |
| Biopsy (lymph node, mass, other)           | 8      |      |
| Tubal ligation/vasectomy                   | 9      |      |
| Cataract surgery                           | 4      |      |

**Table 3. Availability of surgical (including obstetrics and trauma) interventions.**

Number of facilities at which the procedure is available. N=14

|                                  |    |
|----------------------------------|----|
| <b>Anaesthesia</b>               |    |
| Regional anaesthesia blocks      | 6  |
| Spinal anaesthesia               | 13 |
| Ketamine intravenous anaesthesia | 13 |
| General anaesthesia inhalational | 5  |

**Table 4. Availability of anaesthesia interventions** Number of facilities at which the procedure is available. N=14

## v. Emergency equipment and supplies for resuscitation

Basic equipment access was also lacking. No facility had access to all basic and essential surgical equipment listed by the tool. Only 1 hospital always had adult resuscitator bag valves and masks available, and only 2 out of 14 facilities reported the same for paediatric bag valves and masks. 64% of facilities had access to oxygen only sometimes or never, and less than 30% had oropharyngeal airways always available for both adults and children. 39% of institutions were without an examination table.

Basic equipment such as suction catheters, IV cannulas, and Foley catheters were only consistently available in less than 30% of all facilities.

57 % of facilities did not have sterile gloves consistently available, and 64% reported the same for examination gloves. Only 64% of the reporting institutions had a sterilizer available all the time. 71% did not have face masks available, and 86% were without consistent availability of eye protection. Availability of soap and wash basins was reported in less than two thirds of the 14 facilities.

The availability of emergency equipment and supplies for resuscitation was assessed in each of the health facilities (depicted in tables 5, 6 and 7).

|                               |               |                  |              |
|-------------------------------|---------------|------------------|--------------|
| <b>Capital Outlays</b>        | <b>Always</b> | <b>Sometimes</b> | <b>Never</b> |
| Resuscitator bag valve & mask |               |                  |              |

|                                                     |    |   |   |
|-----------------------------------------------------|----|---|---|
| Adult                                               | 1  | 7 | 6 |
| Paediatric                                          | 2  | 5 | 7 |
| Oxygen                                              | 5  | 4 | 5 |
| Stethoscope                                         | 9  | 3 | 0 |
| Batteries for flash light                           | 8  | 2 | 4 |
| Suction pump                                        | 11 | 3 | 0 |
| Blood pressure monitoring equipment                 | 10 | 3 | 1 |
| Thermometer                                         | 10 | 3 | 1 |
| Scalpel Handle with blade                           | 9  | 4 | 1 |
| Retractor                                           | 7  | 6 | 0 |
| Scissors straight 12cm                              | 8  | 5 | 1 |
| Scissors blunt 14cm                                 | 7  | 6 | 0 |
| Oropharyngeal airway<br>Adult                       | 4  | 6 | 4 |
| Paediatric                                          | 4  | 5 | 5 |
| Forceps Kocher no teeth                             | 5  | 7 | 1 |
| Forceps, artery                                     | 8  | 6 | 0 |
| Kidney dishes stainless steel                       | 6  | 6 | 1 |
| Capped bottle, alcohol based solutions              | 2  | 5 | 3 |
| Gloves (sterile)                                    | 6  | 7 | 1 |
| Gloves (examination)                                | 5  | 8 | 1 |
| Needle holder                                       | 9  | 5 | 0 |
| Sterilizer                                          | 9  | 5 | 0 |
| Nail brush, scrubbing surgeon's                     | 7  | 5 | 1 |
| Vaginal speculum                                    | 9  | 2 | 3 |
| Bucket, plastic                                     | 4  | 4 | 4 |
| Drum for sterile compresses, bandages,<br>dressings | 8  | 4 | 1 |
| Examination table                                   | 8  | 4 | 1 |

**Table 5. Availability of Capital Outlays for Resuscitation**

Number of facilities where element is always, sometimes, or never available. N=14

| <b>Renewable</b>                   |   |    |   |
|------------------------------------|---|----|---|
| Suction catheter sizes 16 FG       | 2 | 5  | 6 |
| Tongue depressor wooden disposable | 3 | 7  | 3 |
| Nasogastric tubes 10 to 16 FG      | 2 | 10 | 2 |
| Light source (lamp & flash light)  | 4 | 9  | 1 |
| Intravenous fluid infusion set     | 3 | 9  | 2 |
| IV cannulas                        | 4 | 8  | 2 |
| Scalp vein infusion set            | 3 | 7  | 3 |
| Syringes 2ml                       | 4 | 9  | 1 |
| Syringes 10 ml                     | 4 | 10 | 0 |
| Disposable needles                 | 5 | 8  | 1 |
| Sharps disposal container          | 5 | 8  | 1 |

|                                                        |   |    |   |
|--------------------------------------------------------|---|----|---|
| Tourniquet                                             | 4 | 8  | 1 |
| Sterile gauze dressing                                 | 3 | 8  | 2 |
| Bandages sterile                                       | 3 | 7  | 3 |
| Adhesive tape                                          | 3 | 9  | 1 |
| Needles, cutting & round bodied (for suturing)         | 4 | 8  | 2 |
| Suture synthetic absorbable                            | 4 | 6  | 3 |
| Splints for arm, leg                                   | 2 | 8  | 4 |
| Towel cloth                                            | 2 | 8  | 3 |
| Absorbent cotton wool                                  | 2 | 10 | 1 |
| Urinary catheter Foleys disposable #12, 14,18 with bag | 3 | 7  | 3 |
| Sheeting, plastic for examination table                | 4 | 7  | 3 |
| Waste disposal container                               | 4 | 8  | 2 |
| Face masks                                             | 4 | 8  | 2 |
| Eye protection                                         | 2 | 5  | 7 |
| Apron, plastic reusable                                | 3 | 9  | 2 |
| Soap                                                   | 5 | 9  | 0 |
| Wash basin                                             | 4 | 8  | 1 |

**Table 6. Availability of Renewable Supplies for Resuscitation**

Number of facilities where element is always, sometimes, or never available. N=14

| <b>Supplementary equipment</b>  |   |   |    |
|---------------------------------|---|---|----|
| Magills forceps                 | 3 | 2 | 9  |
| Adult                           |   |   |    |
| Paediatric                      | 1 | 2 | 10 |
| Endotracheal tubes              | 1 | 2 | 10 |
| IV infusor bags                 | 1 | 2 | 10 |
| Chest tubes insertion equipment | 1 | 3 | 9  |
| Laryngoscope                    | 3 | 3 | 7  |
| Adult                           |   |   |    |
| Paediatric                      | 1 | 3 | 9  |
| Cricothyroidotomy set           | 1 | 1 | 11 |

**Table 7. Availability of Supplementary Equipment for Resuscitation**

Number of facilities where element is always, sometimes, or never available. N=14

## LIMITATIONS

There are a several limitations to this survey. It provides only a brief overview of the capacity for surgical care and cannot be used for detailed programme planning. Although not every first-referral health facility in Somalia was surveyed, the majority identified by the MoH and WHO Somalia did reply and this allows a credible insight into the surgical capacity of the country.

1  
2  
3 Some of the data was taken after the WHO IMEESC toolkit was implemented in the  
4 country, and results should be qualified by the possibility of interpretation constraints of  
5 the survey.  
6  
7

## 8 **DISCUSSION**

9

10 Surgically treatable diseases are among the top 15 causes of disability,[16] and  
11 conservative estimates show that 11% of the world's disability-adjusted life years  
12 (DALYs) stem from surgically treatable conditions.[1] In 2004, South East Asia and  
13 Africa accounted for 54% of the global burden,[17] and since then the burden of surgical  
14 disease is thought to be increasing.[16]  
15  
16

17  
18 More than 2 billion people globally are without access to surgical care.[18] Of the 243  
19 million surgical procedures performed globally each year, the 34.8% of the world's  
20 population living in low-income countries only have access to 8.1 million (only 3.5%) of  
21 such procedures.[2] As a result, rates of maternal mortality are high, minor surgical  
22 pathologies become lethal, and treatable trauma progresses to death.  
23  
24

25 Despite the great, unmet need and inclusion in policy-level dialogue on primary health  
26 care, the delivery of emergency surgical care has long been sidelined in global financing  
27 and policy debates, largely due to perceived complexity and cost. Despite the growing  
28 need for access to surgical care, human resources, metrics and science focused on global  
29 surgery, and sustained financing mechanisms for surgical infrastructure lag behind other  
30 public health priorities (Smith-Rohrberg Maru, D, McGee, HM, Brady, JS et al. Global  
31 Surgical Care in 2030: Metrics and Strategies for Expansion in Access and Quality. 2013.  
32 [www.worldwewant2015.org/file/298623/download/323967](http://www.worldwewant2015.org/file/298623/download/323967))  
33  
34

35 Enormous shortfalls in infrastructure, supplies, and procedures undertaken are common at  
36 district-level health facilities in LMICs.[19] Every \$1 spent strengthening local surgical  
37 capacity generates \$10 through improved health and increased productivity.[20] In 2008,  
38 the Copenhagen Consensus Center's research identified strengthening surgical capacity,  
39 particularly at the district hospital level, as a highly cost-efficient solution to global  
40 diseases. Notably, strengthening local surgical capacity is an approach that would both  
41 provide a high degree of financial protection to populations and address the most DALYs  
42 in a cost effective manner.[1] In fact, the benefit-cost-ratio for the expansion of surgical  
43 capacity at district hospitals was found to be 10:1.[21] Furthermore, due to the  
44 implementation of "vertical" programmes in public health (i.e. child health, maternal  
45 health, cancer, and trauma), in which most programmes contain some surgical component,  
46 strengthening surgical services may improve health system overall.[22]  
47  
48  
49  
50

51 This study provides an overview of the capacity for surgical care representing health  
52 facilities from in all 3 administrative zones of Somalia, including 10 out of 18 regions,  
53 and demonstrates the significant gaps in infrastructure, life-saving and disability-  
54 preventing surgical interventions and essential equipment. Of the 14 reporting health  
55 facilities, 12 identified as full hospitals, serving an average patient population of over  
56 300,000 people, further indicating the need for surgical care system strengthening.  
57  
58  
59  
60

1  
2  
3  
4  
5  
6  
7  
8  
9  
10  
11  
12  
13  
14  
15  
16  
17  
18  
19  
20  
21  
22  
23  
24  
25  
26  
27  
28  
29  
30  
31  
32  
33  
34  
35  
36  
37  
38  
39  
40  
41  
42  
43  
44  
45  
46  
47  
48  
49  
50  
51  
52  
53  
54  
55  
56  
57  
58  
59  
60

Of the 35 basic surgical and anaesthesia interventions, most hospitals were unable to provide all of the basic surgical services. Major essential procedures such as caesarean section, appendicectomy, elective hernia and hydrocele repair, and laparotomy were offered at a majority of hospitals, but these conflicted directly with the continuous availability of basic and necessary supplies and infrastructures. Only 3 facilities had any consistent access to oxygen cylinders, and even less reported access to tubing, valves, and masks.

Necessary procedures including resuscitation and airway management were offered at a majority (79%) of facilities. Those reporting the inability to provide resuscitation procedures, however, all reported the provision of major surgical procedures that would require provision and knowledge of those same procedures. The facilities in questions could not be contacted for confirmation.

Still, many facilities lacked access to key equipment and supplies such as provisional oxygen equipment, oropharyngeal airways, and IV cannulas. Only 2 facilities reported access to a functional anaesthesia machines, and few facilities noted the ability to provide general anaesthesia inhalation. Both oxygen and anaesthesia are essential medicines, (WHO Model List of Essential Medicines. World Health Organizations. 2013. [http://www.who.int/medicines/publications/essentialmedicines/18th\\_EML\\_Final\\_web\\_8Jul13.pdf](http://www.who.int/medicines/publications/essentialmedicines/18th_EML_Final_web_8Jul13.pdf)) and the existing deficit limits the availability of safe and effective life-saving surgeries in Somalia or can result in significant complication or unnecessary patient suffering when these medicines are not provided.[23]

A surprisingly low amount of facilities reported having access to equipment necessary for the prevention of HIV transmission and other infection control. Less than half of the facilities reported access to sterile gloves, waste disposal containers, face masks, eye masks, aprons, and even soap and only slight more than half of the facilities had access to a sterilizer, all key components in the reduction of HIV transmission (WHO Prevention of Transmission of HIV. 2007. <http://www.who.int/surgery/publications/HIVprevention.pdf>)

A majority of the facilities lacked any formal guidelines for the management of emergency care, surgery, pain relief, or anaesthesia, providing a significant barrier to the strengthening of emergency and surgical care services and severely limiting their ability to respond to large scale disaster and crisis situations.

The severe gaps in infrastructure and capital entail obstacles for the delivery of basic primary care in these facilities as well. Absence of key infrastructural elements such as water, electricity, and oxygen, as well as the lack of consistent renewable sterilization tools and supplies involved in infection prevention (bandages, alcohol, gloves, aprons, soap, etc.) is common among the facilities depicted. Establishing management guidelines for surgical infrastructure and targeted development in improving access to these lacking areas would not only increase the quality of surgical services, but also that of basic primary care services offered by these facilities.

1  
2  
3  
4  
5 Strengthening of surgical systems will not only reduce the disease burden of surgically  
6 related issues but can also increase progress toward achieving the 2015 Millennium  
7 Development Goals (MDGs). Strengthening surgical care delivery can help achieve  
8 MDGs 1 (eradication of poverty),[18] 4 (child health), 5 (maternal health), and 6  
9 (HIV/AIDS prevention).[21] Investments in oxygen and related equipment and basic  
10 infrastructural needs, such as electricity and running water, will also serve to benefit  
11 patients suffering from a range of conditions.  
12  
13

14  
15 To meet the needs of LMICs, the WHO Emergency and Essential Surgical Care (EESC)  
16 program with its partners worldwide developed the *Integrated Management for*  
17 *Emergency and Essential Surgical Care* (IMEESC) toolkit (WHO IMEESC Toolkit:  
18 <http://www.who.int/surgery/en>). It guides policies, research for evidence-based planning  
19 (WHO EESC Situation Analysis Tool to assess emergency, trauma, obstetrics, anesthesia  
20 and surgical services, WHO EESC Global Database), training, best practice protocols at  
21 point-of-care, monitoring and evaluation of the progress of surgical care systems. The  
22 IMEESC toolkit provides guidance for policymakers, managers, and providers at various  
23 levels of care, instructional videos, training modules on emergency & trauma for frontline  
24 health workers, disaster- management resources, and monitoring and evaluation.  
25  
26  
27  
28  
29

30  
31 This study provides insight into the surgical capacity of Somalia, using the WHO Tool  
32 for Situational Analysis to Assess Emergency and Essential Surgical Care. Addressing  
33 the gaps identified by this study and the strengthening of surgical services are needed to  
34 strengthen health systems holistically in Somalia.[24] Further research is needed to  
35 determine the burden of surgical disease in Somalia and to determine the cost-benefit of  
36 specific interventions to improve surgical services.  
37  
38

39  
40 **Disclaimer:** The authors include staff members of WHO. They are responsible for the  
41 views expressed in this publication and do not necessarily represent the decisions or  
42 stated policy of WHO.  
43

44 **Contributors:** NE analyzed and interpreted the data, drafted the article, revised it and  
45 finally approved the submitted version. AS analyzed and interpreted the data, drafted the  
46 article, revised it and finally approved the submitted version. MC contributed to  
47 conception and design, acquisition and interpretation of data, helped draft the article,  
48 made critical revisions and finally approved the submitted version. OS contributed to  
49 acquisition of data, made critical revisions and finally approved the submitted version.  
50 ME contributed to acquisition of data, made critical revisions and finally approved the  
51 submitted version. GP contributed to acquisition of data, made critical revisions and  
52 finally approved the submitted version. AI contributed to acquisition of data, made  
53 critical revisions and finally approved the submitted version.  
54  
55

56 **Acknowledgements:** The following members of GIEESC in Somalia were instrumental  
57 in obtaining the reported data: Dr. Yassin Arab Abdi, Dr. Nima Abdi Hassan, Dr.  
58  
59  
60



Mohamed Samy Salama, Dr. Mahmoud Mostafa El-Antably, Dr. Jamal Mohamed Jama, Dr. Abdulcadir Mohamud Giama, Dr. Nura Mohamed Ahmed, Dr. Saeed Hussien Legeh, Dr. Risaaq Mohamoud Yousuf, Dr. Cabdi Qaadu Bikri, Dr. Ahmed Jama, Dr. Muse Geele, Dr. Noor M. Noor.

**Funding Statement:** This research received no specific grant from any funding agency in the public, commercial or not-for-profit sectors.

**Competing interests:** None.

**Data sharing statement:** No additional data are available, all has been included.

## REFERENCES

1. Debas HT, Gosselin R, McCord C, et al. Surgery. In: Jamison D, ed. Disease Control Priorities in Developing Countries. 2<sup>nd</sup> edn. New York: Oxford University Press, 2006:1245-59.
2. Weiser TG, Regenbogen SE, Thompson KD, et al. An estimation of the global volume of surgery: a modelling strategy based on available data. *Lancet* 2008;**372**:139-44.
3. World Health Organisation. Regional Office for the Eastern Mediterranean, Cairo. Country Cooperation Strategy for WHO and Somalia 2010-2014. 2010.
4. UNICEF. The private sector and health: a survey of Somaliland private pharmacies. 2008.
5. UNDP. Population projections. 2007.
6. UNDP. Millennium Development Goals Report for Somalia. 2007
7. Penoyar T, Cohen H, Kibatata P, et al. Emergency and surgery services of primary hospitals in United Republic of Tanzania. *BMJ Open* 2012; **2**(1): e000369
8. Natuzzi ES, Kushner A, Jagilly R, et al. Surgical Care in the Solomon Islands: a road map for universal surgical care delivery. *World J Surg* 2011; **35**(6):1183-93.
9. Idriss A, Shivute N, Bickler S, et al. Emergency, anaesthetic and essential surgical capacity in the Gambia. *Bull World Health Organ*. Epub 2011 May.
10. Sherman L, Clement P, Cherian M, et al. Implementing Liberia's Poverty Reduction Strategy: An Assessment of Emergency and Essential Surgical Care. *Arch Surg* 2011;**146**: 35 - 39.

11. Choo S, Perry H, Hesse AA, et al. Assessment of capacity for surgery, obstetrics and anaesthesia in 17 hospitals in Ghana using a WHO assessment tool. *Trop Med Int Health* 2010 September.
12. Contini S, Taqdeer A, Cherian M, et al. Emergency and Essential Surgical Services in Afghanistan: Still a Missing Challenge. *World J Surg* 2010 January.
13. Taira BR, Cherian MN, Yakandawala H, et al. Survey of Emergency and Surgical Capacity in the Conflict-Affected Regions of Sri Lanka. *World J Surg* 2009 October.
14. Kingham TP, Kamara TB, Cherian MN, et al. Quantifying Surgical Capacity in Sierra Leone: A Guide for Improving Surgical Care. *Arch Surg* 2009;144(2):122-127.
15. Cherian MN, Noel L, Buyanjargal Y, et al. Essential emergency and surgical procedures in resource-limited facilities: a WHO workshop in Mongolia. *World Hosp Health Serv* 2004;40(4):24-29.
16. Farmer P, Kim J. "Surgery and global health: a view from beyond the OR." *World J Surg* 2008; 32(4):533-536.
17. Johnson, WD. Surgery as a Global Health Issue. *Surg Neurol Int*. First: 03 April 2013. doi:10.4103/2152-7806.110030
18. Funk, LM, Weiser, TG, Berry, WR, et al. "Global Operating Theatre Distribution and Pulse Oximetry Supply: an Estimation from Reported Data." *Lancet*. 2010;376(9746): 1055-1061.
19. Kushner AI, Cherian MN, Shokohmand, AS, et al. Addressing the Millennium Development Goals from a surgical perspective: essential surgery and anesthesia in 8 low- and middle-income countries. *Arch Surg* 2010;145(2): 154-159.
20. United Nations. A New Global Partnership: Eradicate Poverty And Transform Economies Through Sustainable Development: The Report of the High-Level Panel of Eminent Persons on the Post-2015 Development Agenda. United Nations Publication 2013.
21. Jamison, D, Jha, P, Bloom, D. Diseases – disease control. In: Lomborg, B. *Global Crises, Global Solutions*: 2<sup>nd</sup> ed. New York: Cambridge University Press. 2009:129-163.
22. Ozgediz, D, Jamison, D, McQueen, K. The burden of surgical conditions and access to surgical care in low- and middle-income countries. *Bull World Health Organ* 2008;86(8):646-647
23. Cherian, MN, Merry, AF, Wilson, IH. The World Health Organization and Anaesthesia. *Anaesthesia*, 2007;62:65-66

1  
2  
3  
4  
5  
6  
7  
8  
9  
10  
11  
12  
13  
14  
15  
16  
17  
18  
19  
20  
21  
22  
23  
24  
25  
26  
27  
28  
29  
30  
31  
32  
33  
34  
35  
36  
37  
38  
39  
40  
41  
42  
43  
44  
45  
46  
47  
48  
49  
50  
51  
52  
53  
54  
55  
56  
57  
58  
59  
60

24. Hedges JP, Mock CN, Cherian MN. The Political Economy of emergency and essential surgery in global health. World J Surg 2010;**34**:2003–2006. [PubMed: 20454792]

For peer review only

# A Survey of Essential Surgical Capacity in Somalia

## Corresponding Author:

Akshay Sharma  
254 Cabot Mail Center  
Cambridge, MA USA  
Phone: 001-949-735-4736  
Email: akshay1227@gmail.com

## Co-Authors:

Dr. Natalie Elkheir<sup>1</sup>; Akshay Sharma<sup>2</sup>; Dr. Meena Cherian<sup>3</sup>; Dr. Omar Abdelrahman Saleh<sup>4</sup>; Dr. Marthe Everard<sup>5</sup>; Dr. Ghulam Rabani Popal<sup>6</sup>; Dr Abdi Awad Ibrahim<sup>7</sup>

<sup>1</sup>St. George's Hospital, London, United Kingdom

<sup>2</sup>Harvard College, Harvard University, Cambridge, Massachusetts, USA

<sup>3</sup>Emergency & Essential Surgical Care Programme, Health Systems and Innovation, World Health Organization - HQ, Geneva, Switzerland

<sup>4</sup>[Emergency Humanitarian Action](#) Coordinator, World Health Organization Somalia, Nairobi, Kenya

<sup>5</sup>World Health Organization Somalia, Nairobi, Kenya

<sup>6</sup>WHO Representative Somalia, World Health Organization Somalia, Nairobi, Kenya

<sup>7</sup>Resident Advisor to the Minister of Health Somalia, Ministry of Health Somalia, Mogadishu, Somalia

**Keywords:** Surgery, Somalia, Emergency, Anaesthesia, Trauma

**Word count:** 2,679

## ABSTRACT

**Objective:** ~~The objective of this study was to~~To assess life-saving and disability-preventing surgical services (including emergency, trauma, obstetrics, anaesthesia) of health facilities in Somalia and to assist in the planning of strategies for strengthening surgical care systems.

**Design:** Cross-sectional survey.

**Setting:** Health facilities in all 3 administrative zones of Somalia: northwest Somalia (NWS), known as Somaliland; northeast Somalia (NES), known as Puntland; and south/central Somalia (SCS).

**Participants:** 14 health facilities

**Measures:** The WHO Tool for Situational Analysis to Assess Emergency and Essential Surgical Care was employed to capture a health facility's capacity to deliver surgical and anaesthesia services by investigating four categories of data: infrastructure; human resources; interventions available; and equipment.

**Results:** The 14 facilities surveyed in Somalia represent 10 of 18 districts throughout the country. The facilities serve an average patient population of 331,250 people, and 12 of 14 identify as hospitals. While major surgical procedures were provided at many facilities (cCaesarean Section, Laparotomy, ~~appendectomy~~Appendectomy, etc.), only 22% had fully available oxygen access, 50% fully available electricity, and less than 30% had any management guidelines for emergency and surgical care. Furthermore, only 36% were able to provide general anaesthesia inhalation due to lack of skills, supplies, and equipment. Basic supplies for airway management and the prevention of infection transmission were severely lacking in most facilities.

**Conclusions:** According to the results of the WHO Tool for Situational Analysis to Assess Emergency and Essential Surgical Care survey, there exist significant gaps in the capacity of emergency and essential surgical services in Somalia including inadequacies in essential equipment, services provision, and infrastructure. The information provided by ~~this~~ WHO tool can serve as a basis for evidenced-based decisions on country-level policy regarding the allocation of resources and provision of emergency and essential surgical services.

## ARTICLE SUMMARY

### Article Focus

- On-site visits to primary health centres in a developing nation
- Evaluate capacity to deliver emergency and essential surgical care

### Strengths and limitations of this study

- Provides insight into the surgical capacity of Somalia
- Identifies significant gaps and areas for improvement towards evidence-based planning to improve surgical infrastructure, skills training, and equipment and supplies
- Does not capture data from every first-referral health facilities of the country

Formatted: Font: Times New Roman, 12 pt

- ~~Measures are subjective and i~~n some cases, measures captured are estimates

## INTRODUCTION

Conditions that can be treated with surgery account for ~~an estimated~~ 11% of the world's disability-adjusted life years.[1] Despite recent data estimating the global volume of surgery at 234 million surgical procedures annually and significant disparities between procedures performed in high- and low- income countries, global public health initiatives have traditionally neglected the necessity for the provision of surgical services.[2] Poor access to surgical services, particularly at rural facilities, results in excess morbidity and mortality from a broad range of treatable surgical conditions including injuries, complications of pregnancy, sequelae of infectious diseases, acute abdominal conditions and congenital ~~abnormalities~~anomalies. Improving the access to surgical services in low-income countries requires addressing gaps in infrastructure, the training and skills of ~~rained/skilled~~ personnel, appropriate equipment and medications.

## BACKGROUND

Somalia's 21 years of war, armed conflict and insecurity have had a devastating effect on the health sector. The current situation is at its worst level since the beginning of the civil war in 1991, with unprecedented levels of child malnutrition and, internal displacement, as well as conflict and insecurity rife in some parts of the country.[3] Continuing conflict has left 90% of health infrastructure looted, damaged or destroyed.[4] The low health workforce ratios before the war have depreciated through high levels of healthcare worker emigration, leaving an estimated 3 physicians per 100000 population (total 253 physicians), 11 nurses per 100 000 population (861 nurses) and 2 midwives per 100 000 population (116 midwives) serving the whole country.[5]

Rates of death and disability from treatable surgical conditions continue to be unacceptably high. Somalia's maternal mortality rate is estimated to be 1044 per 100 000 live births, one of the highest in the region.[6] This corresponds to a lifetime risk of one maternal death for every 10 women. The leading causes of maternal death (ante-partum and postpartum haemorrhage, obstructed labour and eclampsia) can all be addressed with appropriate emergency obstetric care, which often require surgical and ~~for~~ anaesthetics interventions. Trauma ~~related mortality, as a consequence of through~~ road traffic accidents, armed fighting and landmine explosions, is also common. In 2010 and 2011, WHO reported more than 7500 war-wounded civilians who were admitted to three main hospitals in Mogadishu, one in five being children and one in three women (World Health Organization. Emergency and Essential Surgical Care. 2013. [www.who.int/surgery/en/](http://www.who.int/surgery/en/))

The health sector faces overwhelming challenges in a country where two decades of lawlessness have resulted in the collapse of central government and 3 almost

1  
2  
3  
4  
5  
6  
7  
8  
9  
10  
11  
12  
13  
14  
15  
16  
17  
18  
19  
20  
21  
22  
23  
24  
25  
26  
27  
28  
29  
30  
31  
32  
33  
34  
35  
36  
37  
38  
39  
40  
41  
42  
43  
44  
45  
46  
47  
48  
49  
50  
51  
52  
53  
54  
55  
56  
57  
58  
59  
60

autonomously-ruled zones: northwest Somalia (NWS), known as Somaliland; northeast Somalia (NES), known as Puntland; and south/central Somalia (SCS). Somalia's public health system is tiered, comprising regional referral hospitals, district hospitals, maternal and child health centres and health posts. However, hospitals and health facilities are limited in number, inadequately distributed, operate using vastly different standards, and often cannot provide a minimum package of primary health care (PHC) services. As funders and public health experts adopt the expansion of primary healthcare services, the inclusion of surgical services at the first-referral level is critical. The purpose of this survey was to collect knowledge gained from comprehensive quantitative assessments of surgical capacity in Somalia in order to assist in planning strategies for universal access to life-saving and disability-preventing surgical services (World Health Organization. Emergency and Essential Surgical Care. 2013. [www.who.int/surgery/en/](http://www.who.int/surgery/en/)).

Similar studies using the WHO Situational Analysis tool have been conducted in Tanzania,[7] Solomon Islands,[8] Gambia,[9] Liberia,[10] Ghana,[11] Afghanistan,[12] Sri Lanka,[13] Sierra Leone,[14] and Mongolia.[15]

## OBJECTIVE

The objective of this study was to assess life-saving and disability-preventing surgical services (including emergency, trauma, obstetrics, anaesthesia) of health facilities in Somalia and to assist in the planning of strategies for strengthening surgical care systems.

To assess the current capacity for essential anaesthesia and surgical services in Somalia with the purpose of providing a benchmark for critical areas needing improvement.

## METHODS

The WHO Tool for Situational Analysis to Assess Emergency and Essential Surgical Care was employed to capture a health facility's capacity to perform basic surgical (including obstetrics and trauma) and anaesthesia interventions by investigating four categories of data: infrastructure, human resources, interventions provided and equipment availability. The tool queries the availability of 8 types of care providers, 35 surgical interventions and 67 items of equipment.[7] The answer of available was defined as "fully available for all patients all of the time," while sometimes was defined as "available with frequent shortages or difficulties" (WHO EESC Situational Analysis Tool, 2012. [http://www.who.int/surgery/publications/WHO\\_EESC\\_SituationAnalysisTool.pdf](http://www.who.int/surgery/publications/WHO_EESC_SituationAnalysisTool.pdf)).

Facilities were also asked the size of the 'population served', intending to quantify the population living in the catchment area. This value represents the number of residents who might use the facility as their first-referral health facility, not the number of patients seen.

▲ The WHO Tool for Situational Analysis to Assess Emergency and Essential Surgical Care was distributed by the Ministry of Health and WHO Somalia to 20 first-referral-level-health facilities around the country and was completed at 14 health facilities representing 10 of the 18 regions of Somalia and all 3 administrative zones. The survey

Formatted: Pattern: Clear (White)

was extended to regional medical officers and facility administrators. Participation in the survey and reporting to the WHO was voluntary. The physical surveys were then obtained either by post directly to the WHO Somalia office (Nairobi, Kenya) or by site visits from the Somalia Ministry of Health (MoH), the WHO country office and members of the Global Initiative for Emergency and Essential Surgical Care (GIEESC) between September 2011 and April 2012.

Despite efforts to standardize the reporting and the collection of much of the data by site-visits performed by agents affiliated to the authors, it must be noted that an inherent reporting bias may be present in the data, given that survey data was compiled by different agents at each site. Furthermore, in a limited number of cases, facilities did not respond to individual questions. Blank answers were considered as neither a positive or negative answer, but simply deemed as unreported.

The collected data were then entered into and analyzed from WHO Global DataCol Database for Emergency and Essential Surgical Care.

## RESULTS

- i Health facility characteristics
- ii Infrastructure
- iii Human resources
- iv Interventions
- v Equipment

Data were gathered from 14 health facilities in 10 regions (out of 18) across Somalia, as featured figure 1 and table 1. [The 6 facilities that received the survey but did not return information are also listed below. Non-reporting can be attributed to a lack of consistent operation, inability to gather the data, and the pervasive political instability and high security risk throughout the country, making the transmission of this data difficult and costly.](#)

| Type of Facility (Self-identified) | Name of Facility          | Region          | Number of Beds | Operating Theaters |
|------------------------------------|---------------------------|-----------------|----------------|--------------------|
| General Hospital                   | Garowe Hospital           | Nugaal          | 51-80          | 11-20              |
|                                    | Gardo General Hospital    | Bari            | 21-50          | 1                  |
|                                    | Hergeisa Group Hospital   | Woqooyi Galbeed | 301-400        | 5-10               |
| Provincial Hospital                | Borama General Hospital   | Awdal           | 201-300        | 1                  |
|                                    | Burao Regional Hospital   | Togdeer         | 201-300        | 1                  |
|                                    | Berbera Referral Hospital | Woqooyi Galbeed | 101-200        | 2                  |
|                                    | Erigavo Regional Hospital | Sanaag          | 81-100         | 1                  |

Formatted Table



|                                            |                                                  |                                 |                     |                     |
|--------------------------------------------|--------------------------------------------------|---------------------------------|---------------------|---------------------|
|                                            | Sool Regional Hospital                           | Sool                            | 81-100              | 1                   |
| <b>Health Centreeer</b>                    | Doolow Health Centreeer                          | Gedo                            | 5-10                | 1                   |
| <b>Private/NGO/Mission Hospital</b>        | Galkayo Medical Centreeer                        | Mudug                           | 51-80               | 3-4                 |
|                                            | Galkayo Specialist Hospital                      | Mudug                           | 3-4                 | 1                   |
|                                            | Medina Hospital                                  | Banadir                         | 201-300             | 5-10                |
|                                            | Maani Hospital                                   | Banadir                         | 21-50               | 1                   |
|                                            | Manhal Specialty Hospital                        | Woqooyi Galbeed                 | 51-80               | 5-10                |
| <b>Facilities Not Responding to Survey</b> | <a href="#">Shikh Hospital</a>                   | <a href="#">Woqooyi Galbeed</a> | <a href="#">N/A</a> | <a href="#">N/A</a> |
|                                            | <a href="#">Puntland Regional Hospital</a>       | <a href="#">Bossaso</a>         | <a href="#">N/A</a> | <a href="#">N/A</a> |
|                                            | <a href="#">General Medical Service Hospital</a> | <a href="#">Mudug</a>           | <a href="#">N/A</a> | <a href="#">N/A</a> |
|                                            | <a href="#">Wajed Hospital</a>                   | <a href="#">Bakool</a>          | <a href="#">N/A</a> | <a href="#">N/A</a> |
|                                            | <a href="#">Dinsor Hospital</a>                  | <a href="#">Bakool</a>          | <a href="#">N/A</a> | <a href="#">N/A</a> |
|                                            | <a href="#">Sama Hospital</a>                    | <a href="#">Bay</a>             | <a href="#">N/A</a> | <a href="#">N/A</a> |

Formatted: Font: Bold

Table 1. [Surveyed hResponding](#) health facilities. N=14

Formatted: Font: Not Bold

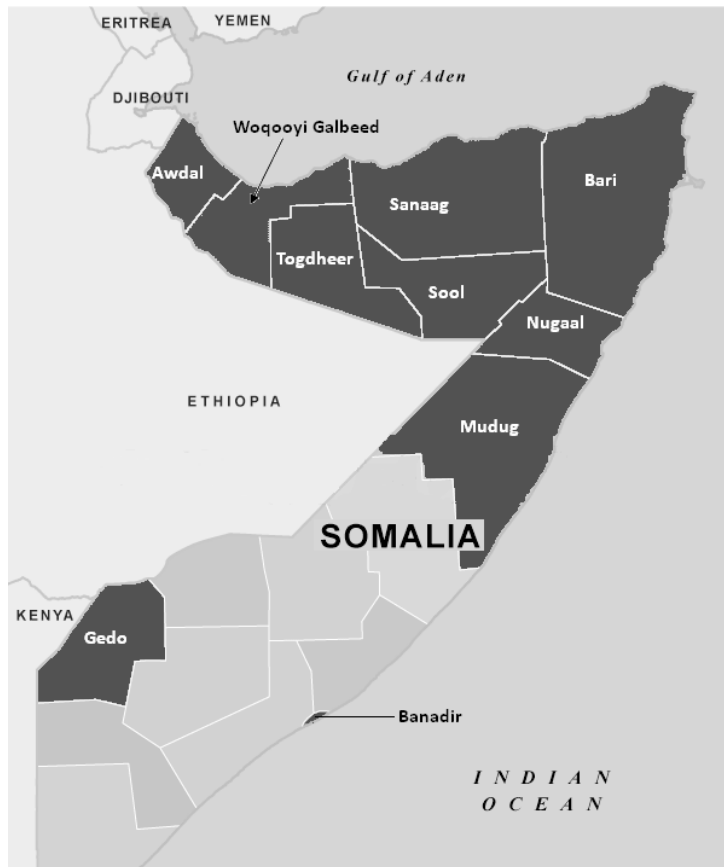

Figure 1. Participating regions of Somalia.

### i. Health facility characteristics

Of the 14 facilities that responded to the survey 5 were provincial hospitals, 5 were private/mission/NGO hospitals, 3 were general hospitals and 1 was a health center. Each facility reported having at least 1 operating theatre, with a maximum of between 11 and 20 operating theatres. The populations served by each facility ranged from 100,000 to 1,000,000 people, with the average population of the reporting facilities at being 331,250 people.

### ii. Infrastructure

The emergency and surgical infrastructure of the 14 reporting facilities were largely inadequate, with only 22% of health facilities having oxygen cylinder supplies consistently available. 28% of facilities never or only sometimes had access to running water available and only 50% had a consistently available electricity source. Only 50% of

the facilities had fully available access to both running water and electricity. Access to a functional anaesthesia machine was only present in 2 (15%) facilities, one of those facilities being a local health center. Only 3 facilities reported access to a functioning pulse-oximeter.

50% of facilities had permanent areas designated always for emergency care and only 38% of facilities had the same for postoperative care.

A minority of facilities had formal management guidelines for emergency care (3/14 = 21%), surgery (5/14 = 36%), anaesthesia (4/14 = 29%), or pain relief (1/14 = 7%).

Table 2 depicts the key infrastructural elements available in the health facilities accessed.

|                                                 | Always | Sometimes | Not Available |
|-------------------------------------------------|--------|-----------|---------------|
| Oxygen cylinder                                 | 3      | 1         | 10            |
| Running water                                   | 10     | 2         | 2             |
| Electricity source                              | 7      | 5         | 2             |
| Operational power generator                     | 2      | 2         | 9             |
| Blood bank                                      | 5      | 3         | 6             |
| Hemoglobin & urine testing                      | 12     | 2         | 0             |
| X-ray machine                                   | 8      | 4         | 2             |
| Medical records                                 | 10     | 3         | 1             |
| <b>Pulse Oximeter</b>                           | 3      | 0         | 8             |
| <b>Area designated for emergency care</b>       | 5      | 1         | 7             |
| <b>Area designated for postoperative care</b>   | 5      | 1         | 7             |
| <b>Management Guidelines for Emergency Care</b> | 3      | 1         | 10            |
| <b>Management Guidelines for Surgery</b>        | 5      | 0         | 9             |
| <b>Management Guidelines for Anaesthesia</b>    | 4      | 1         | 9             |
| <b>Management Guidelines for Pain relief</b>    | 1      | 3         | 10            |
| <b>Functioning anaesthesia machine</b>          | 7      | 5         | 2             |

**Table 2. Availability of infrastructure and health resources in Somalia, 2012**

Number of facilities where element is always, sometimes, or never available. Bolded items designate those which that are specific to quality surgical care delivery. N=14

### iii. Human Resources

More data is needed to comment on the Health Human Resources within healthcare in Somalia. In this section, blank answers to staffing questions impeded our ability to

comment on the state of the workforce completely. We did however summarise the results to survey questions of which all or a majority of facilities supplied data.

The 14 facilities together reported a total of 137 healthcare providers. Only 15 (110.9%) individuals were identified as full time trained surgical specialists, located only at 9 out of 14 of the facilities. 14 (110.9%) were identified as obstetricians, and only 4 (32.9%) individuals were identified as qualified ~~anesthesiologists-anesthetists~~ and were located in only 3 of the 14 facilities, with 27 (2019.7%) unlicensed medical staff (~~N~~nurses, medical assistants, etc.) providing anesthetic services.

#### iv. Interventions

Of the 35 interventions queried, only abscess incision and ~~drainage-drainage arcs~~ offered at all 14 facilities. Acute burn management, wound debridement, hydroco~~ele~~ treatment, and male circumcision are widely provided by the surveyed facilities being offered at 85-865% 86%, 85%, 86%, 86%, of all facilities ~~respectively~~. Caesarean section is offered at 93% of all facilities (~~n=14~~).

Provision of anaesthesia services was severely lacking, however, with only 36% of facilities able to perform general anaesthesia inhalational procedures. Of the 8 facilities that ~~reported backanswered~~ why they could not provide this service, 1 (Doolow Health Center) attributed it to lack of skill and 4 (Borama General Hospital, Doolow Health Center, Erigavo Regional Hospital, Burao Regional Hospital) to lack of supplies or /drugs. 1 facility (Gardo General Hospital) ~~facility~~ attributed it both to lack of skill and lack of equipment.

The ability of each health facility to provide basic surgical and anaesthesia procedures was assessed (tables 3 and 4).

| General surgery & trauma                                                                                    | Available |
|-------------------------------------------------------------------------------------------------------------|-----------|
| Resuscitation (airway, haemorrhage, peripheral percutaneous intravenous access, peripheral venous cut down) | 11        |
| Cricothyroidotomy/ Tracheostomy                                                                             | 10        |
| Chest tube insertion                                                                                        | 9         |
| Removal of foreign body (throat/ear/eye/nose)                                                               | 11        |
| Acute burn management                                                                                       | 12        |
| Incision & drainage of abscess                                                                              | 14        |
| Suturing (for wounds, episiotomy, cervical & vaginal lacerations)                                           | 13        |
| Wound debridement                                                                                           | 11        |
| Caesarean section                                                                                           | 13        |
| Dilatation & curettage (gynaecology/obstetrics)                                                             | 12        |
| Obstetric fistula repair                                                                                    | 7         |
| <del>Appendectomy Appendicectomy</del>                                                                      | 11        |

|                                                                                                               |        |      |
|---------------------------------------------------------------------------------------------------------------|--------|------|
| Hernia repair (strangulated, elective)                                                                        | 10     |      |
| Hydrocoele                                                                                                    | 12     |      |
| Cystostomy                                                                                                    | 9      |      |
| Urethral stricture dilatation                                                                                 | 11     |      |
| Laparotomy (uterine rupture, ectopic pregnancy, acute abdomen, intestinal obstruction, perforation, injuries) | 12     |      |
| Male circumcision                                                                                             | 12     |      |
| Congenital hernia repair                                                                                      | 9      |      |
| Neonatal surgery (abdominal wall defect, colostomy imperforate anus, intussusceptions)                        | 5      |      |
| Cleft lip repair                                                                                              | 10     |      |
| Clubfoot repair                                                                                               | 9      |      |
| Contracture release/ skin grafting                                                                            | 10     |      |
| Fracture treatment                                                                                            | Closed | Open |
|                                                                                                               | 10     | 8    |
| Joint dislocation treatment                                                                                   | 9      |      |
| Drainage of osteomyelitis/septic arthritis                                                                    | 9      |      |
| Amputation                                                                                                    | 11     |      |
| Biopsy (lymph node, mass, other)                                                                              | 8      |      |
| Tubal ligation/vasectomy                                                                                      | 9      |      |
| Cataract surgery                                                                                              | 4      |      |

**Table 3. Availability of surgical (including obstetrics and trauma) interventions.**  
Number of facilities at which the procedure is available. N=14

| <b>Anaesthesia</b>               |    |
|----------------------------------|----|
| Regional anaesthesia blocks      | 6  |
| Spinal anaesthesia               | 13 |
| Ketamine intravenous anaesthesia | 13 |
| General anaesthesia inhalational | 5  |

**Table 4. Availability of anaesthesia interventions** Number of facilities at which the procedure is available. N=14

#### v. Emergency equipment and supplies for resuscitation

Basic equipment access was also lacking. No facility had access to all ~~pieces of~~ basic and essential surgical equipment listed ~~on~~by the tool. Only 1 hospital (~~7%~~) always had adult resuscitator bag valves and masks available, and only 2 out of 14 facilities (~~14%~~) reported the same for paediatric bag valves and masks. 64% of facilities had access to oxygen only sometimes or never, and less than 30% had oropharyngeal airways always available ~~always~~ for both adults and children. 39% of institutions were without an examination table.

Basic ~~equipment~~~~tools~~ such as suction catheters, IV cannulas, and Foley catheters were only consistently available in less than 30% of all facilities.

57 % of facilities did not have sterile gloves consistently available, and 64% reported the same for examination gloves. Only 64% of the reporting institutions had a sterilizer available all the time. 71% ~~did not have~~~~could not make~~ face masks available, and 86% were without consistent availability of eye protection. Availability of soap and wash basins was reported in less than two thirds of the 14 facilities.

The availability of emergency equipment and supplies for resuscitation was assessed in each of the health facilities (depicted in tables 5, 6, and 7).

| Capital Outlays                                  | Always | Sometimes | Never |
|--------------------------------------------------|--------|-----------|-------|
| Resuscitator bag valve & mask                    |        |           |       |
| Adult                                            | 1      | 7         | 6     |
| Paediatric                                       | 2      | 5         | 7     |
| Oxygen                                           | 5      | 4         | 5     |
| Stethoscope                                      | 9      | 3         | 0     |
| Batteries for flash light                        | 8      | 2         | 4     |
| Suction pump                                     | 11     | 3         | 0     |
| Blood pressure monitoring equipment              | 10     | 3         | 1     |
| Thermometer                                      | 10     | 3         | 1     |
| Scalpel Handle with blade                        | 9      | 4         | 1     |
| Retractor                                        | 7      | 6         | 0     |
| Scissors straight 12cm                           | 8      | 5         | 1     |
| Scissors blunt 14cm                              | 7      | 6         | 0     |
| Oropharyngeal airway                             | 4      | 6         | 4     |
| Adult                                            |        |           |       |
| Paediatric                                       | 4      | 5         | 5     |
| Forceps Kocher no teeth                          | 5      | 7         | 1     |
| Forceps, artery                                  | 8      | 6         | 0     |
| Kidney dishes stainless steel                    | 6      | 6         | 1     |
| Capped bottle, alcohol based solutions           | 2      | 5         | 3     |
| Gloves (sterile)                                 | 6      | 7         | 1     |
| Gloves (examination)                             | 5      | 8         | 1     |
| Needle holder                                    | 9      | 5         | 0     |
| Sterilizer                                       | 9      | 5         | 0     |
| Nail brush, scrubbing surgeon's                  | 7      | 5         | 1     |
| Vaginal speculum                                 | 9      | 2         | 3     |
| Bucket, plastic                                  | 4      | 4         | 4     |
| Drum for sterile compresses, bandages, dressings | 8      | 4         | 1     |
| Examination table                                | 8      | 4         | 1     |

**Table 5. Availability of Capital Outlays for Resuscitation**

Number of facilities where element is always, sometimes, or never available. N=14

| <b>Renewable</b>                                       |   |    |   |
|--------------------------------------------------------|---|----|---|
| Suction catheter sizes 16 FG                           | 2 | 5  | 6 |
| Tongue depressor wooden disposable                     | 3 | 7  | 3 |
| Nasogastric tubes 10 to 16 FG                          | 2 | 10 | 2 |
| Light source (lamp & flash light)                      | 4 | 9  | 1 |
| Intravenous fluid infusion set                         | 3 | 9  | 2 |
| IV cannulas                                            | 4 | 8  | 2 |
| Scalp vein infusion set                                | 3 | 7  | 3 |
| Syringes 2ml                                           | 4 | 9  | 1 |
| Syringes 10 ml                                         | 4 | 10 | 0 |
| Disposable needles                                     | 5 | 8  | 1 |
| Sharps disposal container                              | 5 | 8  | 1 |
| Tourniquet                                             | 4 | 8  | 1 |
| Sterile gauze dressing                                 | 3 | 8  | 2 |
| Bandages sterile                                       | 3 | 7  | 3 |
| Adhesive tape                                          | 3 | 9  | 1 |
| Needles, cutting & round bodied (for suturing)         | 4 | 8  | 2 |
| Suture synthetic absorbable                            | 4 | 6  | 3 |
| Splints for arm, leg                                   | 2 | 8  | 4 |
| Towel cloth                                            | 2 | 8  | 3 |
| Absorbent cotton wool                                  | 2 | 10 | 1 |
| Urinary catheter Foleys disposable #12, 14,18 with bag | 3 | 7  | 3 |
| Sheeting, plastic for examination table                | 4 | 7  | 3 |
| Waste disposal container                               | 4 | 8  | 2 |
| Face masks                                             | 4 | 8  | 2 |
| Eye protection                                         | 2 | 5  | 7 |
| Apron, plastic reusable                                | 3 | 9  | 2 |
| Soap                                                   | 5 | 9  | 0 |
| Wash basin                                             | 4 | 8  | 1 |

**Table 6. Availability of Renewable Supplies for Resuscitation**

Number of facilities where element is always, sometimes, or never available. N=14

| <b>Supplementary equipment</b>  |   |   |    |
|---------------------------------|---|---|----|
| Magills forceps<br>Adult        | 3 | 2 | 9  |
| Paediatric                      | 1 | 2 | 10 |
| Endotracheal tubes              | 1 | 2 | 10 |
| IV infusor bags                 | 1 | 2 | 10 |
| Chest tubes insertion equipment | 1 | 3 | 9  |

|                       |   |   |    |
|-----------------------|---|---|----|
| Laryngoscope<br>Adult | 3 | 3 | 7  |
| Paediatric            | 1 | 3 | 9  |
| Cricothyroidotomy set | 1 | 1 | 11 |

**Table 7. Availability of Supplementary Equipment for Resuscitation**

Number of facilities where element is always, sometimes, or never available. N=14

## LIMITATIONS

There are several limitations to this survey. ~~Firstly, it~~ provides only a brief overview of the capacity for surgical care and cannot be used for detailed programme planning.

~~Second, although not every first-referral health facility in Somalia was surveyed, the majority identified by the MoH and WHO Somalia did reply and this allows a credible insight into the surgical capacity of the country.~~

~~Third, it does not capture data from every first-referral health facility of the country; however, a majority of the first-referral health facilities identified by the MoH and WHO Somalia have responded, allowing us to provide a glimpse into the state of basic surgical capacity in the country.~~ ~~Third, s~~ Some of the data was taken after the WHO IMEESC toolkit was implemented in the country, and results should be qualified by the possibility of interpretation constraints of the survey.

## DISCUSSION

Surgically treatable diseases are among the top 15 causes of disability,[16] and conservative estimates show that 11% of the world's ~~d~~Disability-~~a~~Adjusted life years (DALYs) stem from surgically treatable ~~ableed~~ conditions.[1] In 2004, South East Asia and Africa accounted for 54% of the global burden,[17] and since then the burden of surgical disease is thought to be increasing.[16]

More than 2 billion people globally are without access to surgical care.[18] Of the 243 million surgical procedures performed globally each year, the 34.8% of the world's population living in low-income countries only have access to 8.1 million (only 3.5%) of such procedures.[2] As a result, rates of maternal mortality are high, minor surgical pathologies become lethal, and treatable trauma progresses to death.

Despite the great, unmet need and inclusion in policy-level dialogue on primary health care, the delivery of emergency surgical care has long been sidelined in global financing and policy debates, largely due to perceived complexity and cost. ~~Further, d~~Despite the ~~large and~~ growing need for ~~expanding~~ access to surgical care, human resources, metrics and science focused on global surgery, and sustained financing mechanisms for surgical infrastructure lag behind other public health priorities (Smith-Rohrberg Maru, D, McGee, HM, Brady, JS et al. Global Surgical Care in 2030: Metrics and Strategies for Expansion in Access and Quality. 2013. [www.worldwewant2015.org/file/298623/download/323967](http://www.worldwewant2015.org/file/298623/download/323967))



1  
2  
3  
4  
5  
6  
7  
8  
9  
10  
11  
12  
13  
14  
15  
16  
17  
18  
19  
20  
21  
22  
23  
24  
25  
26  
27  
28  
29  
30  
31  
32  
33  
34  
35  
36  
37  
38  
39  
40  
41  
42  
43  
44  
45  
46  
47  
48  
49  
50  
51  
52  
53  
54  
55  
56  
57  
58  
59  
60

Enormous shortfalls in infrastructure, supplies, and procedures undertaken are common at district-level health facilities in LMICs.[19] Every \$1 spent strengthening local surgical capacity generates \$10 through improved health and increased productivity.[20] In 2008, the Copenhagen Consensus Center's research identified strengthening surgical capacity, particularly at the district hospital level, as a highly cost-efficient solution to global diseases. Notably, strengthening local surgical capacity is an approach that would both provide a high degree of financial protection to populations and address the most DALYs in a cost effective manner.[1] In fact, the benefit-cost-ratio for the expansion of surgical capacity at district hospitals was found to be 10:1.[21] Furthermore, due to the implementation of "vertical" programmes in public health (i.e. child health, maternal health, cancer, and trauma), in which most programmes contain some surgical component, strengthening surgical services may improve health system overall.[22]

This study provides an overview of the capacity for surgical care representing health facilities from in all 3 administrative zones of Somalia, including 10 out of 18 regions regions-of-18-in-Somalia, and demonstrates the significant gaps in infrastructure, life-saving and disability-preventing surgical interventions and essential equipment. Of the 14 reporting health facilities, 12 identified as full hospitals, serving an average patient population of over 300,000 people, further indicating the need for surgical care system strengthening.

Of the 35 basic surgical and anaesthesia interventions, most hospitals were unable to provide all of the basic surgical services. Major essential procedures such as Caesarean section, appendicectomy, elective hernia and hydrocele repair, and laparotomy were offered at a majority of hospitals, but these conflicted directly with the continuous availability of basic and necessary supplies and infrastructures. Only 3 facilities had any consistent access to oxygen cylinders, and even less reported access to tubing, valves, and masks.

Necessary procedures including resuscitation and airway management were offered at a majority (79%) of facilities. Those reporting the inability to provide resuscitation procedures, however, all reported the provision of major surgical procedures that would require provision and knowledge of those same procedures. The facilities in questions could not be contacted for confirmation.

Still, many facilities lacked access to key equipment and supplies such as provisional oxygen equipment, oropharyngeal airways, and IV cannulas. Only 2 facilities reported access to a functional anaesthesia machines, and few facilities noted the ability to provide general anaesthesia inhalation. Both oxygen and anaesthesia are essential medicines, (WHO Model List of Essential Medicines. World Health Organizations. 2013. [http://www.who.int/medicines/publications/essentialmedicines/18th\\_EML\\_Final\\_web\\_8Jul13.pdf](http://www.who.int/medicines/publications/essentialmedicines/18th_EML_Final_web_8Jul13.pdf)) and the existing deficit limits the availability of safe and effective life-saving surgeries in Somalia or can result in significant complication or unnecessary patient suffering when these medicines are not provided.[23]

A surprisingly low amount of facilities reported having access to equipment necessary for the prevention of HIV transmission and other infection control. Less than half of the

1  
2  
3  
4  
5  
6  
7  
8 facilities reported access to sterile gloves, waste disposal containers, face masks, eye  
9 masks, aprons, and even soap and only slight more than half of the facilities had access to  
10 a sterilizer, all key components in the reduction of HIV transmission (WHO Prevention  
11 of Transmission of HIV. 2007.

12 <http://www.who.int/surgery/publications/HIVprevention.pdf>

13  
14 A majority of the facilities lacked any formal guidelines for the management of  
15 emergency care, surgery, pain relief, or anaesthesia, providing a significant barrier to the  
16 strengthening of emergency and surgical care services and severely limiting their ability  
17 to respond to large scale disaster and crisis situations.

18  
19 The severe gaps in infrastructure and capital entail obstacles for the delivery of basic  
20 primary care in these facilities as well. Absence of key infrastructural elements such as  
21 water, electricity, and oxygen, as well as the lack of consistent renewable sterilization  
22 tools and supplies involved in infection prevention (bandages, alcohol, gloves, aprons,  
23 soap, etc.) is common among the facilities depicted. Establishing management guidelines  
24 for surgical infrastructure and targeted development in improving access to these lacking  
25 areas would not only increase the quality of surgical services, but also that of basic  
26 primary care services offered by these facilities.

27  
28  
29 Strengthening of surgical systems will not only reduce the disease burden of surgically  
30 related issues but can also increase progress toward achieving the 2015 Millennium  
31 Development Goals (MDGs). Strengthening surgical care delivery can help achieve  
32 MDGs 1 (eradication of poverty),[18] 4 (child health), 5 (maternal health), and 6  
33 (HIV/AIDS prevention).[21] Investments in oxygen and related equipment and basic  
34 infrastructural needs, such as electricity and running water, will also serve to benefit  
35 patients suffering from a range of conditions.

36  
37  
38 To meet the needs of LMICs, the WHO Emergency and Essential Surgical Care (EESC)  
39 program with its partners worldwide developed the *Integrated Management for*  
40 *Emergency and Essential Surgical Care* (IMEESC) toolkit (WHO IMEESC Toolkit:  
41 <http://www.who.int/surgery/en>). It guides policies, research for evidence-based planning  
42 (WHO EESC Situation Analysis Tool to assess emergency, trauma, obstetrics, anaesthesia  
43 and surgical services, WHO EESC Global Database), trainings, best practice protocols at  
44 point-of-care, monitoring and evaluation of the progress of surgical care systems. The  
45 IMEESC toolkit provides guidance for policymakers, managers, and providers at various  
46 levels of care, instructional videos, training modules on ~~e~~Emergency & ~~T~~rauma-Care for  
47 frontline health workers, disaster- management resources, and monitoring and evaluation.

48  
49  
50 This study provides insight into the surgical capacity of Somalia, using the WHO Tool  
51 for Situational Analysis to Assess Emergency and Essential Surgical Care. Addressing  
52 the gaps identified by this study and the strengthening of surgical services are needed to  
53  
54  
55  
56  
57  
58  
59  
60

strengthen health systems holistically in Somalia.[24] Further research is needed to determine the burden of surgical disease in Somalia and to determine the cost-benefit of specific interventions to improve surgical services.

**Disclaimer:** The authors include staff members of WHO. They are responsible for the views expressed in this publication and do not necessarily represent the decisions or stated policy of WHO.

**Contributors:** NE analyzed and interpreted the data, drafted the article, revised it and finally approved the submitted version. AS analyzed and interpreted the data, drafted the article, revised it and finally approved the submitted version. MC contributed to conception and design, acquisition and interpretation of data, helped draft the article, made critical revisions and finally approved the submitted version. OS contributed to acquisition of data, made critical revisions and finally approved the submitted version. ME contributed to acquisition of data, made critical revisions and finally approved the submitted version. GP contributed to acquisition of data, made critical revisions and finally approved the submitted version. AI contributed to acquisition of data, made critical revisions and finally approved the submitted version.

**Acknowledgements:** The following members of GIEESC in Somalia were instrumental in obtaining the reported data: [Dr. Yassin Arab Abdi](#), [Dr. Nima Abdi Hassan](#), [Dr. Mohamed Samy Salama](#), [Dr. Mahmoud Mostafa El-Antably](#), [Dr. Soleh Abdullah Omar](#), [Dr. Jamal Mohamed Jama](#), [Dr. Abdulcadir Mohamud Giama](#), [Dr. Nura Mohamed Ahmed](#), [Dr. Saeed Hussien Legeh](#), [Dr. Risaaq Mohamoud Yousuf](#), [Dr. Cabdi Qaadu Bikri](#), [Dr. Ahmed Jama](#), [Dr. Muse Geele](#), [Dr. Noor M. Noor](#).

**Funding Statement:** This research received no specific grant from any funding agency in the public, commercial or not-for-profit sectors.

**Competing interests:** None.

**Data sharing statement:** No additional data are available, all has been included.

## REFERENCES

1. Debas HT, Gosselin R, McCord C, et al. Surgery. In: Jamison D, ed. Disease Control Priorities in Developing Countries. 2<sup>nd</sup> edn. New York: Oxford University Press, 2006:1245-59.
2. Weiser TG, Regenbogen SE, Thompson KD, et al. An estimation of the global volume of surgery: a modelling strategy based on available data. *Lancet* 2008;**372**:139-44.
3. World Health Organisation. Regional Office for the Eastern Mediterranean, Cairo. Country Cooperation Strategy for WHO and Somalia 2010-2014. 2010.
4. UNICEF. The private sector and health: a survey of Somaliland private pharmacies. 2008.

- 1
  - 2
  - 3
  - 4
  - 5
  - 6
  - 7
  - 8
  - 9
  - 10
  - 11
  - 12
  - 13
  - 14
  - 15
  - 16
  - 17
  - 18
  - 19
  - 20
  - 21
  - 22
  - 23
  - 24
  - 25
  - 26
  - 27
  - 28
  - 29
  - 30
  - 31
  - 32
  - 33
  - 34
  - 35
  - 36
  - 37
  - 38
  - 39
  - 40
  - 41
  - 42
  - 43
  - 44
  - 45
  - 46
  - 47
  - 48
  - 49
  - 50
  - 51
  - 52
  - 53
  - 54
  - 55
  - 56
  - 57
  - 58
  - 59
  - 60
5. UNDP. Population projections. 2007.
  6. UNDP. Millennium Development Goals Report for Somalia. 2007
  7. Penoyar T, Cohen H, Kibatala P, et al. Emergency and surgery services of primary hospitals in United Republic of Tanzania. *BMJ Open* 2012; **2**(1): e000369
  8. Natuzzi ES, Kushner A, Jagilly R, et al. Surgical Care in the Solomon Islands: a road map for universal surgical care delivery. *World J Surg* 2011; **35**(6):1183-93.
  9. Idriss A, Shivute N, Bickler S, et al. Emergency, anaesthetic and essential surgical capacity in the Gambia. *Bull World Health Organ*. Epub 2011 May.
  10. Sherman L, Clement P, Cherian M, et al. Implementing Liberia's Poverty Reduction Strategy: An Assessment of Emergency and Essential Surgical Care. *Arch Surg* 2011;**146**: 35 - 39.
  11. Choo S, Perry H, Hesse AA, et al. Assessment of capacity for surgery, obstetrics and anaesthesia in 17 hospitals in Ghana using a WHO assessment tool. *Trop Med Int Health* 2010 September.
  12. Contini S, Taqdeer A, Cherian M, et al. Emergency and Essential Surgical Services in Afghanistan: Still a Missing Challenge. *World J Surg* 2010 January.
  13. Taira BR, Cherian MN, Yakandawala H, et al. Survey of Emergency and Surgical Capacity in the Conflict-Affected Regions of Sri Lanka. *World J Surg* 2009 October.
  14. Kingham TP, Kamara TB, Cherian MN, et al. Quantifying Surgical Capacity in Sierra Leone: A Guide for Improving Surgical Care. *Arch Surg* 2009;**144**(2):122-127.
  15. Cherian MN, Noel L, Buyanjargal Y, et al. Essential emergency and surgical procedures in resource-limited facilities: a WHO workshop in Mongolia. *World Hosp Health Serv* 2004;**40**(4):24-29.
  16. Farmer P, Kim J. "Surgery and global health: a view from beyond the OR." *World J Surg* 2008; **32**(4):533-536.
  17. Johnson, WD. Surgery as a Global Health Issue. *Surg Neurol Int*. First: 03 April 2013. doi:10.4103/2152-7806.110030

18. Funk, LM, Weiser, TG, Berry, WR, et al. "Global Operating Theatre Distribution and Pulse Oximetry Supply: an Estimation from Reported Data." *Lancet*. 2010;**376**(9746): 1055-1061.
19. Kushner AI, Cherian MN, Shokohmand, AS, et al. Addressing the Millennium Development Goals from a surgical perspective: essential surgery and anesthesia in 8 low- and middle-income countries. *Arch Surg* 2010;**145**(2): 154-159.
20. United Nations. A New Global Partnership: Eradicate Poverty And Transform Economies Through Sustainable Development: The Report of the High-Level Panel of Eminent Persons on the Post-2015 Development Agenda. United Nations Publication 2013.
21. Jamison, D, Jha, P, Bloom, D. Diseases – disease control. In: Lomborg, B. *Global Crises, Global Solutions: 2<sup>nd</sup> ed.* New York: Cambridge University Press. 2009:129-163.
22. Ozgediz, D, Jamison, D, McQueen, K. The burden of surgical conditions and access to surgical care in low- and middle-income countries. *Bull World Health Organ* 2008;**86**(8):646-647
23. Cherian, MN, Merry, AF, Wilson, IH. The World Health Organization and Anaesthesia. *Anaesthesia*, 2007;**62**:65-66
24. Hedges JP, Mock CN, Cherian MN. The Political Economy of emergency and essential surgery in global health. *World J Surg* 2010;**34**:2003–2006. [PubMed: 20454792]

1  
2  
3  
4  
5  
6  
7  
8  
9  
10  
11  
12  
13  
14  
15  
16  
17  
18  
19  
20  
21  
22  
23  
24  
25  
26  
27  
28  
29  
30  
31  
32  
33  
34  
35  
36  
37  
38  
39  
40  
41  
42  
43  
44  
45  
46  
47  
48  
49  
50  
51  
52  
53  
54  
55  
56  
57  
58  
59  
60

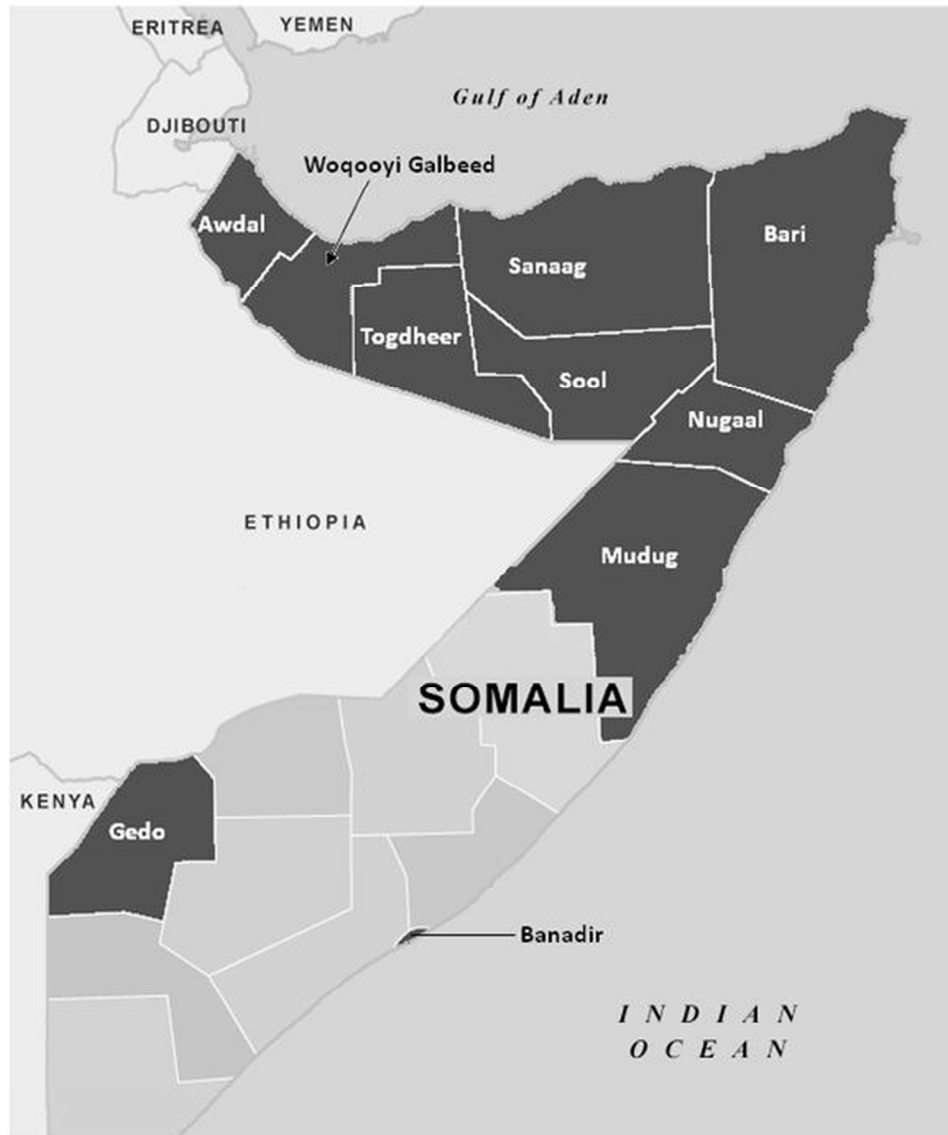

**Figure 1.** Participating regions of Somalia.

Figure 1: Participating regions of Somalia  
90x108mm (300 x 300 DPI)
